# Supplementary material for: Effectiveness of an anti-inflammatory diet versus low-fat diet for knee osteoarthritis: the FEAST randomised controlled trial protocol
Source: PubMed Central journal article supplement — BMJ Open. 2024 Apr 2;14(4):e079374. doi: 10.1136/bmjopen-2023-079374 (PMC10989185; doi:10.1136/bmjopen-2023-079374), 2024-04-02
Supplement: bmjopen-2023-079374.draft_revisions.pdf [file bmjopen-2023-079374.draft_revisions.pdf]

# BMJ Open

BMJ Open is committed to open peer review. As part of this commitment we make the peer review history of every article we publish publicly available.

When an article is published we post the peer reviewers' comments and the authors' responses online. We also post the versions of the paper that were used during peer review. These are the versions that the peer review comments apply to.

The versions of the paper that follow are the versions that were submitted during the peer review process. They are not the versions of record or the final published versions. They should not be cited or distributed as the published version of this manuscript.

BMJ Open is an open access journal and the full, final, typeset and author-corrected version of record of the manuscript is available on our site with no access controls, subscription charges or pay-per-view fees (<http://bmjopen.bmj.com>).

If you have any questions on BMJ Open's open peer review process please email [info.bmjopen@bmj.com](mailto:info.bmjopen@bmj.com)

# BMJ Open

## The effectiveness of an anti-inflammatory diet versus low-fat diet for knee osteoarthritis: the FEAST randomised controlled trial protocol

|                               |                                                                                                                                                                                                                                                                                                                                                                                                                                                                                                                                                                                                                                                                                                                                                                                                                                                                                                                                                                                                                                                                                                                                                                                            |
|-------------------------------|--------------------------------------------------------------------------------------------------------------------------------------------------------------------------------------------------------------------------------------------------------------------------------------------------------------------------------------------------------------------------------------------------------------------------------------------------------------------------------------------------------------------------------------------------------------------------------------------------------------------------------------------------------------------------------------------------------------------------------------------------------------------------------------------------------------------------------------------------------------------------------------------------------------------------------------------------------------------------------------------------------------------------------------------------------------------------------------------------------------------------------------------------------------------------------------------|
| Journal:                      | <i>BMJ Open</i>                                                                                                                                                                                                                                                                                                                                                                                                                                                                                                                                                                                                                                                                                                                                                                                                                                                                                                                                                                                                                                                                                                                                                                            |
| Manuscript ID                 | bmjopen-2023-079374                                                                                                                                                                                                                                                                                                                                                                                                                                                                                                                                                                                                                                                                                                                                                                                                                                                                                                                                                                                                                                                                                                                                                                        |
| Article Type:                 | Protocol                                                                                                                                                                                                                                                                                                                                                                                                                                                                                                                                                                                                                                                                                                                                                                                                                                                                                                                                                                                                                                                                                                                                                                                   |
| Date Submitted by the Author: | 30-Aug-2023                                                                                                                                                                                                                                                                                                                                                                                                                                                                                                                                                                                                                                                                                                                                                                                                                                                                                                                                                                                                                                                                                                                                                                                |
| Complete List of Authors:     | <p>Law, Lynette; La Trobe University, La Trobe Sport and Exercise Medicine Research Centre</p> <p>Heerey, Joshua; La Trobe University, La Trobe Sport and Exercise Medicine Research Centre</p> <p>Devlin, Brooke; University of Queensland, School of Human Movement and Nutrition Sciences</p> <p>Brukner, Peter; La Trobe University, La Trobe Sport and Exercise Medicine Research Centre</p> <p>Kemp, Joanne; La Trobe University, La Trobe Sport and Exercise Medicine Research Centre</p> <p>Attanayake, Amanda; La Trobe University, La Trobe Sport and Exercise Medicine Research Centre</p> <p>Hulett, Mark; La Trobe University, Department of Biochemistry and Chemistry, La Trobe Institute for Molecular Science</p> <p>De Livera, Alysha; La Trobe University, Department of Mathematics and Statistics; The University of Melbourne, School of Population and Global Health</p> <p>Mosler, Andrea; La Trobe University, La Trobe Sport and Exercise Medicine Research Centre</p> <p>Morris, Hayden; Melbourne Knee Centre</p> <p>White, Nathan; Melbourne Knee Centre</p> <p>Culvenor, Adam; La Trobe University, La Trobe Sport and Exercise Medicine Research Centre</p> |
| Keywords:                     | Knee < ORTHOPAEDIC & TRAUMA SURGERY, Chronic Disease, REHABILITATION MEDICINE, NUTRITION & DIETETICS                                                                                                                                                                                                                                                                                                                                                                                                                                                                                                                                                                                                                                                                                                                                                                                                                                                                                                                                                                                                                                                                                       |
|                               |                                                                                                                                                                                                                                                                                                                                                                                                                                                                                                                                                                                                                                                                                                                                                                                                                                                                                                                                                                                                                                                                                                                                                                                            |

SCHOLARONE™  
Manuscripts

# 1 The effectiveness of an anti-inflammatory diet versus low- 2 fat diet for knee osteoarthritis: the FEAST randomised 3 controlled trial protocol

4 Lynette Law<sup>1</sup>, Joshua J Heerey<sup>1</sup>, Brooke L Devlin<sup>2</sup>, Peter Brukner<sup>1</sup>, Joanne L Kemp<sup>1</sup>, Amanda  
5 Attanayake<sup>1</sup>, Mark D Hulett<sup>3</sup>, Alysha De Livera<sup>4, 5, 6</sup>, Andrea B Mosler<sup>1</sup>, Hayden G Morris<sup>7</sup>,  
6 Nathan P White<sup>7</sup>, Adam G Culvenor<sup>1</sup>

- 7 1. La Trobe Sport and Exercise Medicine Research Centre, School of Allied Health,  
8 Human Services and Sport, La Trobe University, Bundoora, Victoria, Australia
- 9 2. School of Human Movement and Nutrition Sciences, University of Queensland,  
10 Brisbane, Australia
- 11 3. Department of Biochemistry and Chemistry, La Trobe Institute for Molecular Science,  
12 La Trobe University, Bundoora, Victoria, Australia
- 13 4. Department of Mathematics and Statistics, La Trobe University, Bundoora, Victoria,  
14 Australia
- 15 5. School of Population and Global Health, The University of Melbourne, Victoria,  
16 Australia
- 17 6. Baker Heart and Diabetes Research Institute, Melbourne, Victoria, Australia
- 18 7. Melbourne Knee Centre, Melbourne, Victoria, Australia.

## 19 **Corresponding Author:**

20  
21 Dr Adam Culvenor  
22 La Trobe Sport and Exercise Medicine Research Centre,  
23 La Trobe University,  
24 Kingsbury Drive, Bundoora, 3086  
25 Victoria, Australia  
26 Phone: +61 9479 5116  
27 Email: a.culvenor@latrobe.edu.au

28  
29 **Word count:** 3,998

1  
2  
3  
4 30 **ABSTRACT**

5  
6 31 **Introduction:** Chronic inflammation plays a key role in knee osteoarthritis pathophysiology  
7  
8 32 and increases risk of comorbidities, yet most interventions do not typically target  
9  
10 33 inflammation. Our study will investigate if an anti-inflammatory dietary program is superior  
11  
12 34 to a standard care low-fat dietary program for improving knee pain, function and quality-of-  
13  
14 35 life in people with knee osteoarthritis.

15 36 **Methods and analysis:** The FEAST (eFEct of an Anti-inflammatory diet for knee  
16  
17 37 oSTeoarthritis) Study is a parallel-group, assessor-blinded, superiority randomised  
18  
19 38 controlled trial. Following baseline assessment, 140 participants aged 45-85 years with  
20  
21 39 symptomatic knee osteoarthritis will be randomly allocated to one of two treatment groups  
22  
23 40 (1:1 ratio). Participants randomised to the anti-inflammatory dietary program will receive six  
24  
25 41 dietary consultations over 12 weeks (2 in-person, 4 phone/videoconference) and additional  
26  
27 42 educational and behaviour change resources. The consultations and resources emphasise  
28  
29 43 nutrient-dense minimally processed anti-inflammatory foods and discourage pro-  
30  
31 44 inflammatory processed foods. Participants randomised to the standard care low-fat dietary  
32  
33 45 program will receive three dietary consultations over 12 weeks (2 in-person, 1  
34  
35 46 phone/videoconference) consisting of healthy eating advice and education based on the  
36  
37 47 Australian Dietary Guidelines, reflecting usual care in Australia. Adherence will be assessed  
38  
39 48 with 3-day food diaries. Outcomes are assessed at 12 weeks and 6 months. The primary  
40  
41 49 outcome will be change from baseline to 12 weeks in the mean score on four Knee injury  
42  
43 50 and Osteoarthritis Outcome Score (KOOS<sub>4</sub>) subscales: knee pain, symptoms, function in daily  
44  
45 51 activities and knee-related quality-of-life. Secondary outcomes include change in individual  
46  
47 52 KOOS subscale scores, patient-perceived improvement, health-related quality-of-life, body  
48  
49 53 mass and composition using dual-energy X-ray absorptiometry, inflammatory (high-  
50  
51 54 sensitivity C-Reactive Protein, Interleukins, Tumour Necrosis Factor- $\alpha$ ) and metabolic blood  
52  
53 55 biomarkers (glucose, HbA1c, insulin, liver function, lipids), lower-limb function and physical  
54  
55 56 activity.

56  
57 57 **Ethics and Dissemination:** Approved by La Trobe University Human Ethics Committee.  
58  
59 58 Results will be presented in peer-reviewed journals and at international conferences.

59 59 **Trial registration:** ACTRN12622000440729  
60

1  
2  
3 60 **Keywords:** Inflammation, Low-carbohydrate, Anti-inflammatory, Pain, Osteoarthritis, Knee,  
4  
5 61 Chronic disease, Rehabilitation, Diet  
6  
7

8 62  
9

10  
11 63 **STRENGTHS AND LIMITATIONS OF THIS STUDY**  
12

- 13  
14 64 • The anti-inflammatory dietary program was codeveloped and piloted with patients and  
15 65 clinicians, with the comparison low-fat dietary program representing usual care.  
16  
17  
18 66 • Sufficiently powered trial evaluating change from baseline to 12 weeks (primary  
19 67 endpoint) and 6 months facilitating longer-term effectiveness evaluation of the anti-  
20 68 inflammatory dietary program.  
21  
22  
23  
24 69 • This trial will evaluate both self-reported and objective outcomes to understand  
25 70 potential mechanisms of symptomatic changes.  
26  
27  
28  
29 71 • While outcome assessors are blinded to group allocation, the health professionals  
30 72 delivering the interventions and participants are unable to be blinded to group  
31 73 allocation due to the type of interventions.  
32  
33  
34  
35  
36  
37  
38  
39  
40  
41  
42  
43  
44  
45  
46  
47  
48  
49  
50  
51  
52  
53  
54  
55  
56  
57  
58  
59  
60

## 74 INTRODUCTION

75 Osteoarthritis (OA) is the most common rheumatic disease affecting approximately 15% of  
76 the population, with OA of the knee being most prevalent<sup>1</sup>. Knee OA and its associated  
77 symptoms can be disabling and lead to substantial societal and healthcare costs<sup>2</sup>. In Australia  
78 alone, annual OA-related healthcare expenditure exceeds \$2.1 billion<sup>3</sup>. Although the main  
79 symptom of knee OA is pain, individuals with knee OA have an increased risk of other chronic  
80 diseases, including cardiovascular disease and diabetes<sup>4</sup>. As many as two-thirds of older  
81 adults with knee OA have more than one comorbidity<sup>5</sup>.

82  
83 Clinical guidelines for knee OA recommend exercise-therapy and weight-loss as first-line  
84 management strategies due to their excellent safety profile and therapeutic effects similar to  
85 commonly used analgesics<sup>2 6</sup>. However, the effectiveness of exercise-therapy has recently  
86 been questioned due to its lack of benefit over an open-label placebo<sup>7</sup>, and findings that one-  
87 third of people completing an exercise program do not achieve a clinically meaningful  
88 improvement in pain<sup>8 9</sup>. Weight-loss programs in those who are overweight or obese typically  
89 consist of caloric restrictive diets, which are challenging to adhere to and sustain<sup>10</sup>. A meta-  
90 analysis highlighted that, within two years of a calorie-restrictive program, over half of initial  
91 weight lost was regained, and by 5 years, this figure jumped to >80%<sup>11</sup>.

92  
93 Anti-inflammatory diets provide an alternative to calorie-restrictive approaches by targeting  
94 local and systemic inflammation, both contributors to OA disease onset, progression and  
95 symptom burden<sup>12-14</sup>. Anti-inflammatory diets are typically high in minimally processed,  
96 nutrient rich foods such as fruit, vegetables, spices and extra virgin olive oil, which are dense  
97 in nutrients such as polyphenols, carotenoids, fibre, monounsaturated and polyunsaturated  
98 fatty acids<sup>15-18</sup>. These nutrients can significantly reduce inflammation even in the absence of  
99 weight loss<sup>19</sup> via antioxidant and anti-inflammatory properties by neutralising free radicals  
100 and associated cell damage, as well as improved lipid profiles<sup>15 16 20</sup>. Due to their focus on real  
101 foods and consumption to satiety, anti-inflammatory diets are likely more sustainable than  
102 traditional calorie-restrictive approaches<sup>16</sup>.

103

1  
2  
3 104 Anti-inflammatory diets have garnered much interest in recent years due to their  
4  
5 105 effectiveness in alleviating symptoms and improving biomarkers for a variety of chronic  
6  
7 106 diseases, including diabetes<sup>17</sup>, cardiovascular disease<sup>21</sup>, epilepsy<sup>22</sup> and rheumatoid arthritis<sup>23</sup>.  
8  
9 107 Small studies investigating anti-inflammatory diets for knee OA have demonstrated feasibility  
10  
11 108 and effectiveness in reducing symptoms and inflammation over 12-16 weeks<sup>14 24 25</sup>. To date,  
12  
13 109 no fully powered randomised controlled trial (RCT) has evaluated the effectiveness of an anti-  
14  
15 110 inflammatory diet in knee OA.

111

112 The primary aim of this RCT is to estimate the average effect of an anti-inflammatory dietary  
113 program compared to a standard care low-fat dietary program on knee-related pain, function  
114 and quality of life in individuals with knee OA. We hypothesise that the anti-inflammatory  
115 dietary program will result in greater improvements in knee-related pain, function and quality  
116 of life after 12 weeks (primary endpoint) and 6 months (secondary endpoint) compared to  
117 the standard care low-fat dietary program. Secondary aims are to assess 12-week and 6-  
118 month effectiveness of the anti-inflammatory dietary program on: i) self-reported global  
119 rating of change and achievement of acceptable symptoms; ii) health-related quality of life;  
120 iii) body mass and composition using dual-energy X-ray absorptiometry (DXA); iv)  
121 inflammatory and metabolic blood biomarkers, global lower-limb function and physical  
122 activity.

123

## 124 **METHODS AND ANALYSIS**

### 125 **Study Design**

126 This protocol describes a pragmatic, 2-arm, parallel-group assessor-blinded superiority RCT  
127 conforming to the Standard Protocol Items: Recommendations for Interventional Trials  
128 (SPIRIT) statement<sup>26</sup>. Reporting of the completed RCT will conform to the Consolidated  
129 Standards of Reporting Trials (CONSORT) statement<sup>27</sup>. The FEAST trial will be conducted at a  
130 single site (La Trobe University) in Melbourne, Australia with enrolment anticipated to occur  
131 over 24 months (2022-2024) and 6-month follow-up completed in 2024. The primary  
132 endpoint will be at 12 weeks, with additional follow-up at 6 months (further longer-term  
133 follow-up dependent on funding). The study was prospectively registered on the Australian  
134 and New Zealand Clinical Trial Registry (ACTRN 12622000440729).

135

136 **Participants**

137 One hundred and forty adults 45-85 years old with chronic knee pain consistent with a clinical  
 138 OA diagnosis using criteria from the National Institute for Health and Care Excellence, which  
 139 does not require radiographic evidence<sup>28</sup>, will be enrolled (table 1).

140

141

142 **Table 1.** Eligibility criteria

| Inclusion criteria                                                                                                                                                                                                                                                                                                                                                                                                                                                                  | Exclusion criteria                                                                                                                                   |
|-------------------------------------------------------------------------------------------------------------------------------------------------------------------------------------------------------------------------------------------------------------------------------------------------------------------------------------------------------------------------------------------------------------------------------------------------------------------------------------|------------------------------------------------------------------------------------------------------------------------------------------------------|
| Fulfil National Institute for Health and Care Excellence <sup>28</sup> clinical criteria for osteoarthritis: <ul style="list-style-type: none"> <li>• Activity-related joint pain with average knee pain severity <math>\geq 4</math> on 11-point numeric rating scale (NRS, where 0 = no pain, 10 = worst pain possible) in the past week;</li> <li>• No morning stiffness or morning stiffness <math>\leq 30</math> min; and</li> <li>• Age <math>\geq 45</math> years</li> </ul> | Knee injection, injury or surgery in the past 3 months                                                                                               |
| Age $\leq 85$ years – due to potential safety reasons and additional co-morbidities                                                                                                                                                                                                                                                                                                                                                                                                 | Had all eligible knee joints replaced by arthroplasty                                                                                                |
| History of knee pain on most days for at least 3 months                                                                                                                                                                                                                                                                                                                                                                                                                             | Planning to have knee surgery in next six months                                                                                                     |
| Be willing and able to attend 3-4 phone consults and 12-week and 6-month follow-up assessments                                                                                                                                                                                                                                                                                                                                                                                      | Already strictly following an anti-inflammatory diet (e.g., low carbohydrate, high-fat, paleo, Mediterranean) or strict exclusion diet (e.g., vegan) |
| Able to understand written and spoken English, and to give informed consent                                                                                                                                                                                                                                                                                                                                                                                                         | Unable to follow anti-inflammatory diet (e.g., medically contraindicated, history of food allergy/hypersensitivity, family reasons)                  |
|                                                                                                                                                                                                                                                                                                                                                                                                                                                                                     | Taking the following medication that affects blood sugar levels: insulin, SGLT 2 inhibitors, sulfonylureas                                           |
|                                                                                                                                                                                                                                                                                                                                                                                                                                                                                     | Contraindications for DXA scans (e.g., pregnant, breastfeeding, planning pregnancy in next 6 months, $>200$ kg body weight)                          |



---

>5kg weight fluctuation in past 3 months  
(i.e., unstable weight)

---

Dietary intervention (by a qualified dietitian)  
in past 3 months

---

A diagnosed psychiatric disorder (excluding  
anxiety and depression), eating disorder or  
past bariatric surgery

---

143 NRS, numeric rating scale; SGLT, sodium glucose co-transporter; DXA, dual-energy X-ray  
144 absorptiometry

145

### 146 **Recruitment and screening procedure**

147 Trial flow is outlined in figure 1. Participants will be recruited from our network of  
148 collaborating orthopaedic surgeons in Victoria, Australia. Consistent with our prior work in  
149 other musculoskeletal conditions<sup>29 30</sup>, potentially eligible participants (i.e., individuals aged  
150 45-85 years with a history of knee pain for which medical care was sought) will be sent a study  
151 information letter inviting them to contact the research team. Additional recruitment  
152 strategies will include advertisements in local newspapers, community/university  
153 magazines/posters, community market stalls and social media.

154

155 **\*\*\*FIGURE ONE HERE\*\*\*\*\***

156

157 Potential participants will be screened for eligibility via telephone. Once eligibility is  
158 confirmed, participants will attend a study orientation session via videoconference to explain  
159 further study details (e.g., fasting requirements) and be orientated to the dietary assessment  
160 tool (3-day food diary). If both knees meet the inclusion criteria, the most symptomatic knee  
161 will be considered as the index knee.

162

### 163 *Randomisation procedure, concealment of allocation and blinding*

164 Upon completion of baseline assessment, participants will be randomised to either the anti-  
165 inflammatory dietary program or standard care low-fat dietary program. Study treatments,  
166 but not study hypotheses, will be revealed to participants. A computer-generated  
167 randomisation schedule has been developed *a priori* by an independent statistician in random  
168 permuted blocks of 4-8 and stratified by sex and body mass index ( $\geq 30\text{kg.m}^{-2}$  vs  $< 30\text{kg.m}^{-2}$ ).

1  
2  
3 169 To ensure concealed allocation, the randomisation schedule will be stored electronically in  
4  
5 170 the secure Research Electronic Data Capture (REDCap®) system and only accessible to an  
6  
7 171 unblinded researcher once baseline measures have been obtained, who will communicate  
8  
9 172 treatment allocation to the participant. Investigators conducting the follow-up assessments  
10  
11 173 will be blinded to group allocation. As the primary outcome is self-reported, participants are  
12  
13 174 considered assessors; therefore, participants (and thus assessors) will be blinded to previous  
14  
15 175 scores. Health professionals delivering the interventions and participants cannot be blinded  
16  
17 176 to group allocation owing to the type of interventions. An independent statistician, blinded  
18  
19 177 to group allocation, will perform the primary RCT analysis.  
20  
21 178

## 21 179 **Interventions**

23 180 The anti-inflammatory dietary program and standard care low-fat dietary program are  
24  
25 181 summarised aligning to Template for Intervention Description and Replication (TIDieR)  
26  
27 182 guidelines<sup>31</sup> (table 2). The same health professionals will deliver the intervention for both  
28  
29 183 groups.  
30  
31 184

### 33 185 *Anti-inflammatory dietary program*

35 186 Participants allocated to the anti-inflammatory dietary program will receive specific anti-  
36  
37 187 inflammatory dietary education and an individualised eating plan, as well as a suite of  
38  
39 188 resources to support behaviour change. The anti-inflammatory dietary program will be  
40  
41 189 delivered over 12 weeks by a qualified dietitian or by another health professional specially  
42  
43 190 trained to deliver the intervention (e.g., physiotherapist).  
44  
45 191

46 192 Participants will be encouraged to follow a diet containing minimal processed foods and high  
47  
48 193 amounts of healthy fats and nutrient-dense wholefoods known to fight inflammation (e.g.,  
49  
50 194 fresh fruits low in natural sugar such as berries, non-starchy vegetables, nuts and seeds,  
51  
52 195 seafood, poultry, red meat, eggs, full-fat dairy). Healthy fats include monounsaturated and  
53  
54 196 polyunsaturated fats with optimal omega-3: omega-6 ratios as found in seafood, nuts, and  
55  
56 197 extra-virgin olive oil. Participants will be advised to limit processed foods, refined  
57  
58 198 carbohydrates (e.g., pasta, bread, rice), confectionary and foods with added sugar.  
59  
60

1  
2  
3 199 Participants will be encouraged to consume a normocaloric diet and to eat to satiety, with no  
4  
5 200 specific percentage of total energy intake targets for carbohydrate, fat or protein.  
6

7 201

8  
9 202 An initial in-person consultation (~45 minutes) will occur immediately following group  
10  
11 203 allocation to constructively review participant's current dietary intake (using baseline 3-day  
12  
13 204 food diary) and develop an individualised meal plan. Participants will be provided with a  
14  
15 205 comprehensive explanation of anti-inflammatory dietary principles, its rationale (e.g., the role  
16  
17 206 of inflammation in OA, link between foods and inflammation) and its potential benefits and  
18  
19 207 side-effects, and address questions and/or concerns. The following educational and  
20  
21 208 behaviour change resources will also be provided at the initial consultation to support  
22  
23 209 adherence: i) bespoke information booklet providing anti-inflammatory eating information,  
24  
25 210 example meal plans, and foods that are encouraged and foods to avoid; ii) complimentary  
26  
27 211 subscription to an anti-inflammatory program (Defeat Diabetes phone app/website),  
28  
29 212 providing anti-inflammatory recipes, masterclasses, meal plans and educational articles; iii)  
30  
31 213 complimentary links to recommended documentaries exploring the benefits of anti-  
32  
33 214 inflammatory nutrition (i.e., Fat Fiction, Cereal Killers, That Sugar Film); and iv) complimentary  
34  
35 215 copy of a book exploring benefits of anti-inflammatory approach (A Fat Lot of Good<sup>32</sup>).  
36

37 216

38 217 Follow-up phone/videoconference consultations (~30 minutes) will be scheduled in weeks 2,  
39  
40 218 4, 6, and 9, with timing to be negotiated between each participant and the health professional  
41  
42 219 delivering the intervention. A final in-person consultation will be delivered immediately  
43  
44 220 following the completion of the 12-week assessment. These follow-up consultations will  
45  
46 221 provide participants with ongoing support, education and accountability. A 3-day food diary,  
47  
48 222 completed prior to each consultation (see outcomes/adherence section), will guide  
49  
50 223 individualised feedback and support to adapt meal plans to optimise adherence.  
51  
52  
53  
54  
55  
56  
57  
58  
59  
60

224 **Table 2:** Overview of intervention delivery described according to the TIDieR guidelines

| 1. BRIEF NAME        | Anti-inflammatory dietary program                                                                                                                                                                                                                                                                                                                                                                                                                       | Standard care low-fat dietary program                                                                                                                                                                                                                                                                      |
|----------------------|---------------------------------------------------------------------------------------------------------------------------------------------------------------------------------------------------------------------------------------------------------------------------------------------------------------------------------------------------------------------------------------------------------------------------------------------------------|------------------------------------------------------------------------------------------------------------------------------------------------------------------------------------------------------------------------------------------------------------------------------------------------------------|
| 2. WHY               | Anti-inflammatory diets targeting systemic inflammation assist in the prevention and management of various chronic diseases <sup>15</sup> . Small pilot studies have shown a positive effect of anti-inflammatory diets to improve knee-related symptoms in people with knee osteoarthritis <sup>25</sup> .                                                                                                                                             | Healthy eating guidelines and dietary advice described in the standard care program booklet was based on Australian Dietary Guidelines (ADGs) <sup>33 34</sup> .<br><br>Two-three dietetic consultations represent usual care for patients referred for dietary management in Australia <sup>18 19</sup> . |
| 3. WHAT (MATERIALS)  | Participants receive an intervention handbook containing all study details, key anti-inflammatory eating principles, example meal plans, traffic light system of foods encouraged and discouraged, and education (e.g., common myths, tips for eating out, shopping tips); complimentary access to the Defeat Diabetes program app/website; complimentary links to three movies; and a complimentary copy of the book "A Fat Lot of Good" <sup>32</sup> | Participants receive an educational handbook emphasising ADGs healthy eating principles and are provided links to the online resources from the Eat for Health website ( <a href="https://www.eatforhealth.gov.au/">https://www.eatforhealth.gov.au/</a> ).                                                |
| 4. WHAT (PROCEDURES) | Six consultations providing individualised guidance and support to follow an anti-inflammatory eating pattern, emphasising the consumption of fruits, non-starchy vegetables, fish, poultry, red meat, eggs, full-fat dairy, nuts, seeds, and extra virgin olive oil. Participants will be encouraged to avoid highly processed foods, refined carbohydrates, added sugar, and processed meats.                                                         | Three consultations providing general advice and education regarding healthy eating based on the ADGs. The principles focus on consumption of foods from the five food groups, while limiting intake of foods containing saturated fat, added salt, added sugars and alcohol.                              |
| 5. WHO PROVIDED      | A qualified dietitian or health professional specially trained to deliver all components.                                                                                                                                                                                                                                                                                                                                                               | A qualified dietitian or health professional specially trained to deliver all components.                                                                                                                                                                                                                  |
| 6. HOW               | Delivered with individual support for 12 weeks, after which, participants will be encouraged to sustain the anti-inflammatory diet unsupported up to 6 months. Consultations are one-to-one.                                                                                                                                                                                                                                                            | Delivered with standard healthy eating advice for 12 weeks, after which, participants will be encouraged to sustain the program unsupported up to 6 months. Consultations are one-to-one.                                                                                                                  |
| 7. WHERE             | In-person consultations will occur at La Trobe University Nutrition and Dietetics research laboratory. Additional                                                                                                                                                                                                                                                                                                                                       | In-person consultations will occur at the La Trobe University Nutrition and Dietetics research                                                                                                                                                                                                             |

|                               |                                                                                                                                                                                                                                                                                                                                                                                   |                                                                                                                                                                                                                                                                                                                                |
|-------------------------------|-----------------------------------------------------------------------------------------------------------------------------------------------------------------------------------------------------------------------------------------------------------------------------------------------------------------------------------------------------------------------------------|--------------------------------------------------------------------------------------------------------------------------------------------------------------------------------------------------------------------------------------------------------------------------------------------------------------------------------|
|                               | consultations will occur via telephone/videoconference (e.g., Zoom). Participants will integrate the diet principles into their daily consumption of foods and beverages.                                                                                                                                                                                                         | laboratory. Additional consultations will occur via telephone/videoconference (e.g., Zoom). Participants will integrate the diet principles into their daily consumption of foods and beverages.                                                                                                                               |
| <b>8. WHEN AND HOW MUCH</b>   | Two in-person consultations at baseline (~45 mins) and week 12 (~30 mins)<br>Four phone/videoconference follow-up consultations (~30 mins) in week 2, 4, 6, and 9.<br><b>Total active intervention delivery time:</b> ~3.5 hours<br><br>Participants are provided with self-management resources to optimise adherence to the anti-inflammatory diet up to the 6-month follow-up. | Two in-person consultations at baseline (~45 mins) and week 12 (~30 mins)<br>One phone/videoconference follow-up consultation (30 mins) in week 6.<br><b>Total active control delivery time:</b> ~1.5 hours<br><br>Participants encouraged to sustain their diet up to 6-month follow-up.                                      |
| <b>9. TAILORING</b>           | Individualised anti-inflammatory dietary advice, education, and support aligning with participant preferences and goals.                                                                                                                                                                                                                                                          | Advice based on the ADGs.                                                                                                                                                                                                                                                                                                      |
| <b>10. MODIFICATIONS</b>      | Any modifications will be reported.                                                                                                                                                                                                                                                                                                                                               |                                                                                                                                                                                                                                                                                                                                |
| <b>11. HOW WELL (planned)</b> | Two-three professionals (qualified dietitian and other health professional) receive prior training in how to deliver and supervise the program. Fidelity is assessed through regular auditing. Participant adherence to the anti-inflammatory diet is assessed through consultation attendance, regular 3-day food diaries and self-report.                                       | Two-three professionals (qualified dietitian and health professional) receive prior training in how to deliver and supervise the program. Fidelity assessed through auditing. Participant adherence to the standard care low-fat diet is assessed through consultation attendance, regular 3-day food diaries and self-report. |
| <b>12. HOW WELL (actual)</b>  | This will be reported in the primary paper.                                                                                                                                                                                                                                                                                                                                       |                                                                                                                                                                                                                                                                                                                                |

225 TIDieR, Template for Intervention Description and Replication; ADG, Australian Dietary Guidelines

1  
2 226 *Standard care low-fat dietary program*  
3  
4

5 227 Participants allocated to the standard care low-fat dietary program will receive advice and  
6 228 education regarding healthy eating based on the Australian Dietary Guidelines<sup>35</sup>. These  
7 229 government-endorsed guidelines aim to optimise nutrition intake through adequate  
8 230 consumption of foods from the five core food groups (grains and cereals; fruit; vegetables and  
9 231 legumes; lean meats and poultry, fish, eggs, and tofu; reduced fat dairy or alternatives), while  
10 232 limiting intake of foods containing saturated fat, added salt, added sugars and alcohol. They are  
11 233 high-carbohydrate and low-fat focused – participants will be encouraged to include at least four  
12 234 serves of wholegrains daily (e.g., brown rice, pasta, bread, quinoa, oats) and to choose low-fat  
13 235 protein and dairy foods where possible.  
14  
15  
16  
17  
18  
19  
20  
21  
22 236

23  
24  
25 237 The program will be delivered through individual consultations with the treating dietitian or other  
26 238 specially trained health professional – the first in-person consultation immediately following  
27 239 baseline assessment (~45 minutes), the second via phone/videoconference at 6 weeks (~30  
28 240 minutes) and the third in-person at 12-week follow-up with timing individualised as required.  
29 241 Two to three consultations represents usual care for patients referred for dietary management  
30 242 in Australia through the current public healthcare (Medicare) rebate system<sup>34 36</sup>. During the initial  
31 243 in-person consultation, participants will be provided with a bespoke educational booklet and  
32 244 advice and education emphasising the Australian Dietary Guideline principles  
33 245 (<https://www.eatforhealth.gov.au/guidelines>) and informed of complementary and publicly  
34 246 available online resources from the Eat for Health website (<https://www.eatforhealth.gov.au/>).  
35  
36  
37  
38  
39  
40  
41  
42  
43

44 247  
45  
46 248 The follow-up phone/videoconference consultation in week-6 and in-person follow-up in week-  
47 249 12 will provide participants with ongoing support, education and accountability. The 3-day food  
48 250 diary, completed prior to each consultation (see outcomes/adherence section), will guide  
49 251 feedback and support to adapt meal plans to optimise adherence. The treating health  
50 252 professionals delivering the two dietary programs will be based centrally at La Trobe University  
51 253 and will be trained by the senior study dietitian (BLD) until deemed competent in intervention  
52 254 delivery.  
53  
54  
55  
56  
57  
58  
59 255  
60

1  
2 256 Irrespective of group allocation, participants can continue usual medical care and consult with  
3  
4 257 their treating health professionals as necessary (e.g., general practitioner regarding medication  
5  
6 258 changes).

7 259

## 9 260 **Data collection procedure**

10  
11 261 Data will be collected at baseline and 6 weeks, 12 weeks and 6 months after randomisation, with  
12  
13 262 12 weeks the *a priori* primary endpoint as this coincides with completion of supported  
14  
15 263 interventions (table 3). Where possible, data will be collected and managed using a secure web-  
16  
17 264 based software platform (REDCap<sup>®</sup>) hosted at La Trobe University<sup>37</sup>, which has equivalent  
18  
19 265 measurement properties to paper-based completion<sup>38</sup>. This strategy was used in our pilot study<sup>25</sup>  
20  
21 266 and other trials of musculoskeletal conditions<sup>39</sup>. Paper versions will also be available if preferred.  
22  
23 267

## 25 268 **OUTCOMES**

### 27 269 **Baseline characteristics**

28  
29 270 Participant characteristics including age, sex, ethnicity, knee pain/surgery details, socioeconomic  
30  
31 271 details (e.g., education level, employment status, living status), medical history and health  
32  
33 272 literacy (assessed with the Rapid Estimate of Adult Literacy in Medicine (REALM)<sup>40</sup>) will be  
34  
35 273 collected (table 3).

### 38 275 **Primary Outcome**

39  
40 276 The primary outcome is the change from baseline to 12 weeks in the mean score on four Knee  
41  
42 277 injury and Osteoarthritis Outcome Score (KOOS<sub>4</sub>) subscales covering knee pain, symptoms,  
43  
44 278 function in daily activities and knee-related quality of life. The KOOS is a 42-item patient-reported  
45  
46 279 outcome measure assessing five separately scored subscales: Pain, Symptoms, Function in Sport  
47  
48 280 and Recreation (Sport/Rec), Activities of Daily Living (ADL), and Quality of Life. The KOOS<sub>4</sub> and all  
49  
50 281 KOOS subscale scores range from 0 (extreme problems) to 100 (no problems). The KOOS is a  
51  
52 282 valid, responsive and reliable questionnaire, with KOOS<sub>4</sub> a primary outcome for other knee OA  
53  
54 283 trials<sup>30 41 42</sup>.

54 284

55 285

56 286

57 287

58 288

289 **Table 3.** Overview of data collection

| Variable                                      | Baseline | 6 weeks | 12 weeks | 6 months |
|-----------------------------------------------|----------|---------|----------|----------|
| <b>Participant characteristics</b>            |          |         |          |          |
| Age                                           | X        |         |          |          |
| Sex                                           | X        |         |          |          |
| Ethnicity                                     | X        |         |          |          |
| Education level                               | X        |         |          |          |
| Health literacy (REALM)                       | X        |         |          |          |
| Employment status                             | X        |         |          |          |
| Smoking status                                | X        |         |          |          |
| Civil status, living situation                | X        |         |          |          |
| Medical history, comorbidities                | X        |         |          |          |
| Knee pain/injury/surgery history              | X        |         |          |          |
| <b>Objective Clinical Outcomes</b>            |          |         |          |          |
| Height, weight, waist girth                   | X        |         | X        | X        |
| 30-second chair stand test                    | X        |         | X        | X        |
| 40 metre walk test                            | X        |         | X        | X        |
| Body composition (DXA)                        | X        |         | X        | X        |
| Blood inflammatory and metabolic biomarkers   | X        |         | X        | X        |
| Blood pressure                                | X        |         | X        | X        |
| <b>Patient-reported Outcomes</b>              |          |         |          |          |
| KOOS subscales                                | X        | X       | X        | X        |
| Global rating of change                       |          | X       | X        | X        |
| Desire for knee surgery                       | X        | X       | X        | X        |
| Medication use                                | X        | X       | X        | X        |
| Knee pain (current and worst in past week)    | X        | X       | X        | X        |
| EQ-5D-5L                                      | X        | X       | X        | X        |
| Patient acceptable symptom state              | X        | X       | X        | X        |
| Brief Pain Inventory                          | X        |         | X        | X        |
| International Physical Activity Questionnaire | X        |         | X        | X        |
| Kessler Psychological Distress Scale (K10)    | X        |         | X        | X        |
| 3-day Food Diaries*                           | X        | X       | X        | X        |
| Adverse events                                |          | X       | X        | X        |

290 REALM, Rapid Estimate of Adult Literacy in Medicine; KOOS, Knee injury and Osteoarthritis Outcome  
 291 Score; DXA, Dual-Energy X-ray absorptiometry

292 \*3-day food diaries are also assessed prior to anti-inflammatory dietary program consultations at 2, 4 and  
 293 9 weeks



1  
2 2943  
4 295 **Secondary effectiveness outcomes**5  
6 296 *KOOS subscales*

7  
8 297 To allow for clinical in-depth interpretation, scores for the five KOOS subscales will be reported  
9  
10 298 individually (i.e., pain, symptoms, function in sports and recreational activities, activities of daily  
11  
12 299 living, quality of life)<sup>9 42</sup>.

13  
14 30015  
16 301 *Global Rating of Change (GROC) and patient-acceptable state*

17  
18 302 Self-perceived change in pain and function will be assessed using a 7-point Likert scale ranging  
19  
20 303 from 'much worse' to 'much better' in response to the questions: "Overall, how has your knee  
21  
22 304 pain changed since the start of the study?" and "Overall, how has your knee function changed  
23  
24 305 since the start of the study?", respectively. Treatment success will be defined as a response of  
25  
26 306 either 'better' or 'much better'. Satisfaction with current knee function using the self-reported  
27  
28 307 Patient Acceptable Symptom State (PASS) question<sup>43</sup>. Participants not satisfied with current knee  
29  
30 308 function at follow-up assessments will be asked a second question to determine if they  
31  
32 309 considered the treatment to have failed<sup>43</sup>.

33 310

34  
35 311 *Anthropometrics*

36  
37 312 Height and weight will be assessed using a seca 217 stadiometer and seca 703 EMR-validated  
38  
39 313 column scale (Hammer Steindamm, Hamburg, Germany), respectively. Waist circumference will  
40  
41 314 be measured using a metal tape measure (Lufkin W606PM ¼ inch x 2m Executive Thinline Pocket  
42  
43 315 Tape).

44  
45 31646  
47 317 *Global lower-limb function*

48  
49 318 Two performance-based tests of lower-limb function recommended by the OA Research Society  
50  
51 319 International (OARSI) will be conducted: the 30-second chair-stand test (number of chair-stands  
52  
53 320 from a standardised height chair in 20 seconds) and 40-metre walk test (time to walk 40 metres  
54  
55 321 safely, using walking aids if required)<sup>44</sup>.

56  
57 322

58

59

60

## 323 *Body composition*

324 A whole-body DXA scan will be acquired using a Hologic Horizon® DXA scanner (Bedford, MA,  
325 United States) to assess adiposity (visceral, peripheral) and lean mass<sup>45</sup>.

## 327 *Inflammatory and metabolic biomarkers*

328 An array of blood inflammatory and metabolic biomarkers will be analysed from samples of blood  
329 collected, including high sensitivity C-Reactive Protein (hsCRP), cytokines (IL-1 $\beta$ , IL-6, IL-8, IL-10,  
330 TNF- $\alpha$ ), blood glucose, HbA1c, serum insulin, liver function tests (including albumin), and lipids  
331 (e.g., high density lipoprotein, triglycerides). Participants will be instructed to fast for at least 10  
332 hours prior to blood collection and a single forearm venepuncture will take place to collect a total  
333 of  $\leq$ 30 mL blood. All samples will be centrifuged (3000ms, 10 minutes), and plasma and serum  
334 frozen (-80°C) for later analysis (Supplementary File 2).

## 336 **Secondary safety outcomes**

### 337 *Adverse events*

338 Adverse events and serious adverse events will be recorded at 6-week, 12-week and 6-month  
339 follow-up via open probe questioning to optimise collection of sufficient detail. Under the  
340 Preferred Reporting Items for Systematic Reviews and Meta-Analyses (PRISMA) harms  
341 statement, an adverse event is defined as any undesirable experience causing participants to  
342 seek medical treatment (e.g., general practitioner)<sup>46</sup>. A serious adverse event is defined as any  
343 undesirable event/illness/injury classified as having the potential to significantly compromise  
344 clinical outcome or result in significant disability or incapacity, those requiring inpatient or  
345 outpatient hospital care, to be life-threatening or result in death.

## 347 **Exploratory outcomes**

### 348 *Dietary Analysis*

349 Participants will record food and beverage intake over three days via the smartphone application  
350 *Australia Calorie Counter - Easy Diet Diary* (Xyris Software Pty Ltd) or on paper (personal  
351 preference). Easy Diet Diary is a commercial calorie counter and food diary that allows users to  
352 email recorded diaries to treating professionals. Once received by the treating health  
353 professional, the 3-day food diaries will be imported into, and analysed using, Foodworks®

1  
2 354 Premium Edition nutrient analysis software (Version 10, Brisbane, Australia 2019) and Australian  
3  
4 355 food composition databases. Paper-based 3-day food diaries will be manually entered into  
5  
6 356 FoodWorks®. Total energy intake, macronutrients, micronutrients and core food group analysis  
7  
8 357 will be reported. Dietary analysis data will also be used to calculate the inflammatory potential  
9  
10  
11 358 of participants' diets (e.g., Dietary Inflammatory Index)<sup>47</sup>.

### 12 13 360 *Quality of life*

14  
15 361 Health-related quality of life will be assessed with the EQ-5D-5L generic health index, which  
16  
17 362 comprises five dimensions of health (mobility, self-care, usual activities, pain or discomfort,  
18  
19 363 anxiety or depression) and a Visual Analogue Scale (VAS) of current overall health status<sup>48</sup>. Both  
20  
21 364 validity and reliability has been demonstrated in arthritic populations<sup>49</sup>.

### 22 23 365 24 25 366 *Knee pain and interference*

26  
27 367 Self-reported knee pain (current, worst over past week, average over past week) will be assessed  
28  
29 368 using a 100mm VAS (0=no pain, 100=worst pain imaginable). The degree to which knee pain  
30  
31 369 interferes with participant's daily functioning will be assessed using the Brief Pain Inventory<sup>50</sup>, a  
32  
33 370 tool with reliability and validity demonstrated in knee pain populations<sup>51 52</sup>.

### 34 35 371 36 37 372 *Change in analgesic medication use*

38  
39 373 Change in analgesic medication use from baseline to 12-week and 6-month follow-up will be  
40  
41 374 assessed with a 7-point Likert scale (much less to much more).

### 42 43 375 44 45 376 *Physical activity*

46  
47 377 Physical activity will be assessed using the International Physical Activity Questionnaire (IPAQ)<sup>53</sup>,  
48  
49 378 a standardised and valid questionnaire providing an estimate of physical activity and sedentary  
50  
51 379 behaviour, which has been widely validated<sup>53 54 55</sup>. Respondents are asked to report time spent  
52  
53 380 in physical activity across three intensities (walking, moderate, vigorous). Using the IPAQ scoring  
54  
55 381 protocol<sup>56</sup>, total weekly physical activity can be estimated by weighting time spent in each activity  
56  
57 382 intensity with its estimated metabolic equivalent (MET) energy expenditure<sup>57</sup>.

1  
2 384 *Blood pressure*  
3

4 385 A pair of seated blood pressure measurements will be obtained using an automated monitor  
5  
6 386 (Omron Model HEM-7121). The blood pressure cuff is placed over the mid-upper arm with the  
7  
8 387 participant seated.  
9

10 388

11  
12 389 *Self-perceived wellness*  
13

14 390 Self-reported sleep quality, hunger, fatigue and energy levels will be assessed using a 100mm  
15  
16 391 VAS (0=worst outcome, 100=best outcome).  
17

18 392

19  
20 393 *Intervention adherence*  
21

22  
23 394 In both randomised groups, intervention adherence will be collected via: i) secure online app  
24  
25 395 (e.g., Foodworks® 3-day food diary) and/or self-reported paper logbooks as preferred, completed  
26  
27 396 in the week prior to each consultation and follow-up assessment; and ii) overall adherence rating  
28  
29 397 (e.g., 5-point Likert scale) at each follow-up assessment.  
30

31 398

32  
33 399 **DATA MANAGEMENT**

34 400 Most outcome data will be collected and managed electronically via REDCap© web-based  
35  
36 401 software hosted at La Trobe University. Other data (e.g., DXA reports) will be stored electronically  
37  
38 402 on the La Trobe University secure research drive. All electronic data will be de-identified  
39  
40 403 (participant code) and exported for data analysis and saved in a password protected database on  
41  
42 404 the La Trobe University research drive only accessible to the research team. Paper-based  
43  
44 405 identifying documents (e.g., consent forms) will be securely stored in a locked filing cabinet  
45  
46 406 accessible only to members of the research team and separately from re-identifiable (i.e., coded)  
47  
48 407 data.  
49

50 408

51 409 Due to the minimal known risks associated with the interventions being evaluated, our study will  
52  
53 410 not have a formal data monitoring committee and does not require an interim analysis. Any  
54  
55 411 unexpected serious adverse events or outcomes will be discussed by the trial management  
56  
57 412 committee (authors of this protocol) and reported to the approving human research ethics  
58  
59 413 committee for monitoring.  
60

60 414

## 415 **Sample size calculation**

416 This trial has been powered to detect a clinically significant between-group difference for the  
417 primary outcome of KOOS<sub>4</sub>. The estimated effect size for low-inflammatory diets on self-reported  
418 pain and function in individuals with arthritis is at least moderate (Cohen's d 0.62)<sup>58</sup>. Recruiting  
419 112 participants (equally distributed between two arms) would yield 90% power to observe such  
420 an effect or larger at a two-tailed Type I error of 0.05. This sample size estimation is conservative  
421 since it is based on independent samples t-test. Using an ANCOVA model that includes the  
422 baseline value as a covariate and is pre-specified for the analysis should provide higher power for  
423 the same sample size. To account for a potential 20% drop-out, we will recruit 140 participants.  
424 This sample size will be sufficient to detect a minimal important change (MIC) in KOOS<sub>4</sub> estimated  
425 at 10 points in patients with knee OA (with a common between-subject standard deviation of  
426 15). Including 140 participants will also provide ≥90% power to detect a statistically significant  
427 between-group difference (two-tailed  $\alpha=0.05$ ) on the secondary outcome of inflammatory  
428 biomarkers (anticipated effect size: Cohen's d 2.33 for hsCRP/IL-6)<sup>58</sup>.

## 430 **Statistical analyses**

431 Analysis will be performed according to the Estimands Framework<sup>59</sup> with a statistical analyst  
432 blinded to group allocation. All outcomes and analyses are prospectively categorised as primary,  
433 secondary or exploratory. For the primary hypothesis, a linear model with baseline value, sex and  
434 BMI ( $\geq 30$  vs  $< 30$  kg.m<sup>-2</sup>) as covariates and treatment condition as a fixed factor will evaluate the  
435 treatment effect on KOOS<sub>4</sub> at 12 weeks. A linear mixed model utilising repeated measures at all  
436 time-points for secondary hypotheses will allow non-biased estimates of treatment effect in the  
437 presence of any potential missing cases, providing data are missing at random. A sensitivity  
438 analysis using pattern-mixture model to investigate the deviation from the missingness-at-  
439 random assumption will be carried out<sup>60</sup>. For secondary binary outcomes (e.g., treatment  
440 success), mixed-effect logistic regression models will be used to assess the effect of treatment. A  
441 subsequent analysis of participants classified as adherent to the protocol will be performed.

## 443 **Healthcare resource use**

444 Healthcare resource utilisation (e.g., hospitalisations, medical imaging, healthcare visits,  
445 medication use) will be assessed by participant self-report to estimate costs associated with the  
446 trial programs (e.g., hospital admissions, medication use, clinician visits, imaging tests, out-of-  
447 pocket expenses).

448

## 449 **Process Evaluation**

450 Semi-structured interviews will be conducted on a subset of consenting participants (until data  
451 saturation reached) at 6 months. Interviews will explore experiences, knowledge and  
452 understanding of interventions received including potential benefits; acceptability and perceived  
453 effectiveness of the intervention; and reasons for adhering (or not) to the allocated diet.  
454 Purposive sampling will be used to recruit interview participants who will then be stratified based  
455 upon characteristics and outcomes of the trial (good outcome; poor outcome). Interviews will be  
456 audio recorded, transcribed and analysed using Framework Analysis<sup>61</sup>. Data will be coded and an  
457 inductive thematic analysis will be applied until no new themes emerge.

### 459 *Patient and public involvement*

460 Participants and clinicians co-designed the anti-inflammatory intervention, research questions  
461 and study methods. This input was gained from: i) qualitative interviews with participants from  
462 the pilot study as part of formal process evaluation strategies<sup>25</sup>; ii) participant and clinician focus  
463 groups providing feedback on study recruitment material and participant handbooks; and iii)  
464 discussion with experienced clinicians managing knee OA and dietary intervention strategies as  
465 part of FEAST development. Patients and clinicians will provide input into the dissemination of  
466 study results by assisting with the decision on what information to share and in what format.

## 468 **ETHICS AND DISSEMINATION**

469 This study complies with the Declaration of Helsinki and has received approval from La Trobe  
470 University Human Ethics Committee (HEC-22044). Written informed consent will be obtained  
471 from participants prior to enrolment (Supplementary File 1). Anti-inflammatory diets are  
472 associated with minimal and transient adverse events, thus there are minimal safety  
473 considerations associated with this trial.

474  
475 Study outcomes will be widely disseminated through a variety of sources. Results will be reported  
476 in peer-reviewed publications and presented at key national and international conferences. Only  
477 aggregate data will be reported. A lay summary report will be available for study participants.  
478 Any important protocol amendments will be reported to the approving ethics committee,  
479 registered at ANZCTR and communicated in the primary RCT paper. Any serious adverse events  
480 will be recorded and reported to the approving ethics committee.

481

**DISCUSSION**

The current RCT will be the first full-scale trial to evaluate the symptomatic, inflammatory, functional and body composition benefits of an anti-inflammatory dietary program compared to a standard care low-fat dietary program based on Australian Dietary Guidelines. While outcome assessors are blinded to group allocation, owing to the type of interventions (i.e., dietary advice) blinding of participants will not be possible.

The evaluation of a non-pharmacological anti-inflammatory dietary program to improve pain, symptoms, and quality of life for individuals with OA could have important individual and socio-economic benefits – decreased healthcare dollars spent on managing OA and reduced surgery waiting lists. Another benefit is that anti-inflammatory diets are also effective at combating metabolic syndrome, a key risk factor for chronic diseases, and thus the benefits from treating OA could stretch further to improving other medical co-morbidities<sup>62</sup>. This fully-powered RCT represents a crucial step towards the development of a sustainable and cost-effective therapy that can both supplement and complement existing treatment strategies to optimise OA outcomes.

**AUTHOR CONTRIBUTIONS**

AGC, BLD, PB and JLK conceived the study and obtained funding. AGC, BLD, PB, and JLK designed the study protocol with input from LL, JJH and ABM. ADL provided statistical expertise and will conduct primary statistical analysis. MDH provided blood analysis expertise and will lead inflammatory and metabolic marker analyses. HGM and NPW assisted with participant recruitment from their clinical population with knee osteoarthritis. LL drafted the manuscript with input from AGC, JJH, BLD, PB, JLK, AA, MDH, ADL, ABM, HGM and NPW. All authors read and approved the final manuscript.

**FUNDING**

This trial is supported by the National Health and Medical Research Council (NHMRC) of Australia through an Investigator Grant held by AGC (GNT2008523), an Investigator Grant held by JLK (APP2017844), and a philanthropic donation from PB.

**COMPETING INTERESTS STATEMENT**



1  
2 515 PB is the founder of Defeat Diabetes and author of “A Fat Lot of Good”. PB contributed to study  
3  
4 516 design but has no role in study execution, data management, analysis or the decision to publish.  
5  
6 517 The NHMRC has no role in study design and will not have any role in its execution, data  
7  
8 518 management, analysis and interpretation or on the decision to submit the results for publication.  
9  
10 519 JLK is an editor of the British Journal of Sports Medicine (British Medical Journal Group). AGC is  
11  
12 520 an associate editor of British Journal of Sports Medicine (British Medical Journal Group). All other  
13  
14 521 authors have no competing interests.  
15  
16 522

## 16 523 **ACKNOWLEDGEMENTS**

17  
18 524 We thank La Trobe University Medical Centre for assistance with blood collection, La Trobe  
19  
20 525 Nutrition and Dietetics department for the use of the nutrition lab and DXA scanner, and  
21  
22 526 Melbourne Pathology for providing pathology collection kits and analysis of biomarkers from  
23  
24 527 blood specimens.  
25  
26 528

## 27 529 **FIGURE LEGENDS**

28  
29 530 **Figure 1.** Flow of participants through the trial. DXA, Dual X-ray Absorptiometry; KOOS, Knee  
30  
31 531 injury and Osteoarthritis Outcome Score  
32  
33 532 \*Optional qualitative interview for process evaluation at 6 months  
34  
35 533  
36  
37 534

## 38 535 **SUPPLEMENTARY FILES**

39  
40 536 **Supplementary File 1.** Patient information and consent form  
41  
42 537 **Supplementary File 2.** Standard Operating Procedures for blood collection, processing and  
43  
44 538 storage  
45  
46 539

## 48 49 540 **REFERENCES**

- 50  
51 541 1. Cui A, Li H, Wang D, et al. Global, regional prevalence, incidence and risk factors of knee osteoarthritis  
52 542 in population-based studies. *EClinicalMedicine* 2020;29-30:100587. doi:  
53 543 10.1016/j.eclinm.2020.100587 [published Online First: 2021/09/11]  
54 544 2. Weng Q, Goh S-L, Wu J, et al. Comparative efficacy of exercise therapy and oral non-steroidal anti-  
55 545 inflammatory drugs and paracetamol for knee or hip osteoarthritis: a network meta-analysis of  
56 546 randomised controlled trials. *British Journal of Sports Medicine* 2023;bjsports-2022-105898. doi:  
57 547 10.1136/bjsports-2022-105898  
58 548 3. Ackerman I, Bohensky M, Pratt C, et al. Counting the Cost: Part 1 Healthcare costs. The current and  
59 549 future burden of arthritis2016.



- 1  
2 550 4. Williams A, Kamper SJ, Wiggers JH, et al. Musculoskeletal conditions may increase the risk of chronic  
3 551 disease: a systematic review and meta-analysis of cohort studies. *BMC Med* 2018;16(1):167. doi:  
4 552 10.1186/s12916-018-1151-2 [published Online First: 2018/09/27]
- 5 553 5. Pihl K, Roos EM, Taylor RS, et al. Associations between comorbidities and immediate and one-year  
6 554 outcomes following supervised exercise therapy and patient education - A cohort study of  
7 555 24,513 individuals with knee or hip osteoarthritis. *Osteoarthritis Cartilage* 2021;29(1):39-49. doi:  
8 556 10.1016/j.joca.2020.11.001 [published Online First: 2020/11/22]
- 9 557 6. Juhl C, Christensen R, Roos EM, et al. Impact of exercise type and dose on pain and disability in knee  
10 558 osteoarthritis: a systematic review and meta-regression analysis of randomized controlled trials.  
11 559 *Arthritis Rheumatol* 2014;66(3):622-36. doi: 10.1002/art.38290 [published Online First:  
12 560 2014/02/28]
- 13 561 7. Henriksen M, Hansen JB, Klokke L, et al. Comparable effects of exercise and analgesics for pain  
14 562 secondary to knee osteoarthritis: a meta-analysis of trials included in Cochrane systematic  
15 563 reviews. *J Comp Eff Res* 2016;5(4):417-31. doi: 10.2217/ce-2016-0007 [published Online First:  
16 564 2016/06/28]
- 17 565 8. Barton CJ, Kemp JL, Roos EM, et al. Program evaluation of GLA:D® Australia: Physiotherapist training  
18 566 outcomes and effectiveness of implementation for people with knee osteoarthritis.  
19 567 *Osteoarthritis and Cartilage Open* 2021;3(3):100175. doi:  
20 568 <https://doi.org/10.1016/j.ocarto.2021.100175>
- 21 569 9. Roos EM, Grønne DT, Skou ST, et al. Immediate outcomes following the GLA:D® program in Denmark,  
22 570 Canada and Australia. A longitudinal analysis including 28,370 patients with symptomatic knee  
23 571 or hip osteoarthritis. *Osteoarthritis Cartilage* 2021;29(4):502-06. doi: 10.1016/j.joca.2020.12.024  
24 572 [published Online First: 2021/02/10]
- 25 573 10. Das SK, Gilhooly CH, Golden JK, et al. Long-term effects of 2 energy-restricted diets differing in  
26 574 glycemic load on dietary adherence, body composition, and metabolism in CALERIE: a 1-y  
27 575 randomized controlled trial. *Am J Clin Nutr* 2007;85(4):1023-30. doi: 10.1093/ajcn/85.4.1023  
28 576 [published Online First: 2007/04/07]
- 29 577 11. Hall KD, Kahan S. Maintenance of Lost Weight and Long-Term Management of Obesity. *Med Clin*  
30 578 *North Am* 2018;102(1):183-97. doi: 10.1016/j.mcna.2017.08.012 [published Online First:  
31 579 2017/11/21]
- 32 580 12. Ansari MY, Ahmad N, Haqqi TM. Oxidative stress and inflammation in osteoarthritis pathogenesis:  
33 581 Role of polyphenols. *Biomed Pharmacother* 2020;129:110452. doi:  
34 582 10.1016/j.biopha.2020.110452 [published Online First: 2020/08/10]
- 35 583 13. Goldring MB, Otero M. Inflammation in osteoarthritis. *Curr Opin Rheumatol* 2011;23(5):471-8. doi:  
36 584 10.1097/BOR.0b013e328349c2b1 [published Online First: 2011/07/27]
- 37 585 14. Strath LJ, Jones CD, Philip George A, et al. The Effect of Low-Carbohydrate and Low-Fat Diets on Pain  
38 586 in Individuals with Knee Osteoarthritis. *Pain Med* 2020;21(1):150-60. doi: 10.1093/pm/pnz022  
39 587 [published Online First: 2019/03/14]
- 40 588 15. Galbete C, Kröger J, Jannasch F, et al. Nordic diet, Mediterranean diet, and the risk of chronic  
41 589 diseases: the EPIC-Potsdam study. *BMC Medicine* 2018;16(1):99. doi: 10.1186/s12916-018-1082-  
42 590 y
- 43 591 16. Simopoulos AP. The importance of the ratio of omega-6/omega-3 essential fatty acids. *Biomed*  
44 592 *Pharmacother* 2002;56(8):365-79. doi: 10.1016/s0753-3322(02)00253-6 [published Online First:  
45 593 2002/11/22]
- 46 594 17. Esposito K, Maiorino MI, Bellastella G, et al. A journey into a Mediterranean diet and type 2 diabetes:  
47 595 a systematic review with meta-analyses. *BMJ Open* 2015;5(8):e008222. doi: 10.1136/bmjopen-  
48 596 2015-008222
- 49 597 18. Hussain T, Tan B, Yin Y, et al. Oxidative Stress and Inflammation: What Polyphenols Can Do for Us?  
50 598 *Oxid Med Cell Longev* 2016;2016:7432797. doi: 10.1155/2016/7432797 [published Online First:  
51 599 2016/10/16]
- 52 600 19. Neale EP, Batterham MJ, Tapsell LC. Consumption of a healthy dietary pattern results in significant  
53 601 reductions in C-reactive protein levels in adults: a meta-analysis. *Nutr Res* 2016;36(5):391-401.  
54 602 doi: 10.1016/j.nutres.2016.02.009 [published Online First: 2016/04/23]

- 1  
2 603 20. Ciaffi J, Mitselman D, Mancarella L, et al. The Effect of Ketogenic Diet on Inflammatory Arthritis and  
3 604 Cardiovascular Health in Rheumatic Conditions: A Mini Review. *Frontiers in Medicine* 2021;8 doi:  
4 605 10.3389/fmed.2021.792846
- 5 606 21. Li J, Lee DH, Hu J, et al. Dietary Inflammatory Potential and Risk of Cardiovascular Disease Among  
6 607 Men and Women in the U.S. *J Am Coll Cardiol* 2020;76(19):2181-93. doi:  
7 608 10.1016/j.jacc.2020.09.535 [published Online First: 2020/11/07]
- 8 609 22. D'Andrea Meira I, Romão TT, Pires do Prado HJ, et al. Ketogenic Diet and Epilepsy: What We Know So  
9 610 Far. *Front Neurosci* 2019;13:5. doi: 10.3389/fnins.2019.00005 [published Online First:  
10 611 2019/02/15]
- 11 612 23. Schönenberger KA, Schüpfer AC, Gloy VL, et al. Effect of Anti-Inflammatory Diets on Pain in  
12 613 Rheumatoid Arthritis: A Systematic Review and Meta-Analysis. *Nutrients* 2021;13(12) doi:  
13 614 10.3390/nu13124221 [published Online First: 2021/12/29]
- 14 615 24. Dyer J, Davison G, Marcora SM, et al. Effect of a Mediterranean Type Diet on Inflammatory and  
15 616 Cartilage Degradation Biomarkers in Patients with Osteoarthritis. *J Nutr Health Aging*  
16 617 2017;21(5):562-66. doi: 10.1007/s12603-016-0806-y [published Online First: 2017/04/28]
- 17 618 25. Cooper I, Brukner P, Devlin B, et al. An anti-inflammatory diet intervention for knee osteoarthritis: a  
18 619 feasibility study. *BMC Musculoskeletal Disorders* 2022;23 doi: 10.1186/s12891-022-05003-7
- 19 620 26. Chan A-W, Tetzlaff JM, Gøtzsche PC, et al. SPIRIT 2013 explanation and elaboration: guidance for  
20 621 protocols of clinical trials. *BMJ : British Medical Journal* 2013;346:e7586. doi:  
21 622 10.1136/bmj.e7586
- 22 623 27. Moher D, Hopewell S, Schulz KF, et al. CONSORT 2010 Explanation and Elaboration: updated  
23 624 guidelines for reporting parallel group randomised trials. *BMJ* 2010;340:c869. doi:  
24 625 10.1136/bmj.c869
- 25 626 28. National Clinical Guideline C. National Institute for Health and Clinical Excellence: Guidance.  
26 627 Osteoarthritis: Care and Management in Adults. London: National Institute for Health and Care  
27 628 Excellence (UK)
- 28 629 Copyright © National Clinical Guideline Centre, 2014. 2014.
- 29 630 29. Culvenor AG, Collins NJ, Guermazi A, et al. Early knee osteoarthritis is evident one year following  
30 631 anterior cruciate ligament reconstruction: a magnetic resonance imaging evaluation. *Arthritis*  
31 632 *Rheumatol* 2015;67(4):946-55. doi: 10.1002/art.39005 [published Online First: 2015/02/19]
- 32 633 30. Culvenor AG, Collins NJ, Guermazi A, et al. Early Patellofemoral Osteoarthritis Features One Year  
33 634 After Anterior Cruciate Ligament Reconstruction: Symptoms and Quality of Life at Three Years.  
34 635 *Arthritis Care Res (Hoboken)* 2016;68(6):784-92. doi: 10.1002/acr.22761 [published Online First:  
35 636 2015/10/17]
- 36 637 31. Hoffmann TC, Glasziou PP, Boutron I, et al. Better reporting of interventions: template for  
37 638 intervention description and replication (TIDieR) checklist and guide. *BMJ : British Medical*  
38 639 *Journal* 2014;348:g1687. doi: 10.1136/bmj.g1687
- 39 640 32. Brukner DP. A Fat Lot of Good. 1 ed: Penguin Australia Pty Ltd 2018:368.
- 40 641 33. Wingrove K, Lawrence MA, Russell C, et al. Evidence Use in the Development of the Australian  
41 642 Dietary Guidelines: A Qualitative Study. *Nutrients* 2021;13(11):3748.
- 42 643 34. Cant RP. Patterns of delivery of dietetic care in private practice for patients referred under Medicare  
43 644 Chronic Disease Management: results of a national survey. *Aust Health Rev* 2010;34(2):197-203.  
44 645 doi: 10.1071/ah08724 [published Online First: 2010/05/26]
- 45 646 35. Health N, Council MR. Australian dietary guidelines. Canberra (Australia): National Health and  
46 647 Medical Research Council. 2013
- 47 648 36. Spencer L, O'Shea MC, Ball L, et al. Attendance, weight and waist circumference outcomes of  
48 649 patients with type 2 diabetes receiving Medicare-subsidised dietetic services. *Aust J Prim Health*  
49 650 2014;20(3):291-7. doi: 10.1071/py13021 [published Online First: 2013/07/05]
- 50 651 37. Harris PA, Taylor R, Minor BL, et al. The REDCap consortium: Building an international community of  
51 652 software platform partners. *J Biomed Inform* 2019;95:103208. doi: 10.1016/j.jbi.2019.103208  
52 653 [published Online First: 2019/05/13]
- 53 654 38. Gudbergesen H, Bartels EM, Krusager P, et al. Test-retest of computerized health status  
54 655 questionnaires frequently used in the monitoring of knee osteoarthritis: a randomized crossover  
55 656 trial. *BMC Musculoskeletal Disorders* 2011;12(1):190. doi: 10.1186/1471-2474-12-190

- 1  
2 657 39. Culvenor AG, West TJ, Bruder AM, et al. Supervised exercise-therapy and Patient Education  
3 658 Rehabilitation (SUPER) versus minimal intervention for young adults at risk of knee  
4 659 osteoarthritis after ACL reconstruction: SUPER-Knee randomised controlled trial protocol. *BMJ*  
5 660 *Open* 2023;13(1):e068279. doi: 10.1136/bmjopen-2022-068279 [published Online First:  
6 661 2023/01/20]
- 7 662 40. Davis TC, Crouch MA, Long SW, et al. Rapid assessment of literacy levels of adult primary care  
8 663 patients. *Fam Med* 1991;23(6):433-5. [published Online First: 1991/08/01]
- 9 664 41. Skou ST, Roos EM, Laursen MB, et al. A Randomized, Controlled Trial of Total Knee Replacement. *N*  
10 665 *Engl J Med* 2015;373(17):1597-606. doi: 10.1056/NEJMoa1505467 [published Online First:  
11 666 2015/10/22]
- 12 667 42. Collins NJ, Prinsen CA, Christensen R, et al. Knee Injury and Osteoarthritis Outcome Score (KOOS):  
13 668 systematic review and meta-analysis of measurement properties. *Osteoarthritis Cartilage*  
14 669 2016;24(8):1317-29. doi: 10.1016/j.joca.2016.03.010 [published Online First: 2016/03/26]
- 15 670 43. Tubach F, Ravaud P, Baron G, et al. Evaluation of clinically relevant states in patient reported  
16 671 outcomes in knee and hip osteoarthritis: the patient acceptable symptom state. *Ann Rheum Dis*  
17 672 2005;64(1):34-7. doi: 10.1136/ard.2004.023028 [published Online First: 2004/05/08]
- 18 673 44. Dobson F, Hinman RS, Roos EM, et al. OARSI recommended performance-based tests to assess  
19 674 physical function in people diagnosed with hip or knee osteoarthritis. *Osteoarthritis and*  
20 675 *Cartilage* 2013;21(8):1042-52. doi: <https://doi.org/10.1016/j.joca.2013.05.002>
- 21 676 45. Shepherd JA, Ng BK, Sommer MJ, et al. Body composition by DXA. *Bone* 2017;104:101-05. doi:  
22 677 10.1016/j.bone.2017.06.010 [published Online First: 2017/06/20]
- 23 678 46. Zorzela L, Loke YK, Ioannidis JP, et al. PRISMA harms checklist: improving harms reporting in  
24 679 systematic reviews. *Bmj* 2016;352:i157. doi: 10.1136/bmj.i157 [published Online First:  
25 680 2016/02/03]
- 26 681 47. Shivappa N, Steck SE, Hurley TG, et al. Designing and developing a literature-derived, population-  
27 682 based dietary inflammatory index. *Public Health Nutr* 2014;17(8):1689-96. doi:  
28 683 10.1017/s1368980013002115 [published Online First: 2013/08/15]
- 29 684 48. Janssen MF, Pickard AS, Golicki D, et al. Measurement properties of the EQ-5D-5L compared to the  
30 685 EQ-5D-3L across eight patient groups: a multi-country study. *Qual Life Res* 2013;22(7):1717-27.  
31 686 doi: 10.1007/s11136-012-0322-4 [published Online First: 2012/11/28]
- 32 687 49. Hurst NP, Kind P, Ruta D, et al. Measuring health-related quality of life in rheumatoid arthritis:  
33 688 validity, responsiveness and reliability of EuroQol (EQ-5D). *Br J Rheumatol* 1997;36(5):551-9. doi:  
34 689 10.1093/rheumatology/36.5.551 [published Online First: 1997/05/01]
- 35 690 50. Cleeland CS, Ryan KM. Pain assessment: global use of the Brief Pain Inventory. *Ann Acad Med Singap*  
36 691 1994;23(2):129-38. [published Online First: 1994/03/01]
- 37 692 51. Mendoza T, Mayne T, Rublee D, et al. Reliability and validity of a modified Brief Pain Inventory short  
38 693 form in patients with osteoarthritis. *Eur J Pain* 2006;10(4):353-61. doi:  
39 694 10.1016/j.ejpain.2005.06.002 [published Online First: 2005/07/30]
- 40 695 52. Roth SH, Fleischmann RM, Burch FX, et al. Around-the-Clock, Controlled-Release Oxycodone Therapy  
41 696 for Osteoarthritis-Related Pain: Placebo-Controlled Trial and Long-term Evaluation. *Archives of*  
42 697 *Internal Medicine* 2000;160(6):853-60. doi: 10.1001/archinte.160.6.853
- 43 698 53. Craig CL, Marshall AL, Sjöström M, et al. International physical activity questionnaire: 12-country  
44 699 reliability and validity. *Med Sci Sports Exerc* 2003;35(8):1381-95. doi:  
45 700 10.1249/01.Mss.0000078924.61453.Fb [published Online First: 2003/08/06]
- 46 701 54. Maddison R, Ni Mhurchu C, Jiang Y, et al. International Physical Activity Questionnaire (IPAQ) and  
47 702 New Zealand Physical Activity Questionnaire (NZPAQ): a doubly labelled water validation. *Int J*  
48 703 *Behav Nutr Phys Act* 2007;4:62. doi: 10.1186/1479-5868-4-62 [published Online First:  
49 704 2007/12/07]
- 50 705 55. Cleland C, Ferguson S, Ellis G, et al. Validity of the International Physical Activity Questionnaire  
51 706 (IPAQ) for assessing moderate-to-vigorous physical activity and sedentary behaviour of older  
52 707 adults in the United Kingdom. *BMC Medical Research Methodology* 2018;18(1):176. doi:  
53 708 10.1186/s12874-018-0642-3
- 54 709 56. Guidelines for data processing analysis of the International Physical Activity Questionnaire (IPAQ) -  
55 710 Short and long forms; 2005.

- 1  
2 711 57. AINSWORTH BE, HASKELL WL, WHITT MC, et al. Compendium of Physical Activities: an update of  
3 712 activity codes and MET intensities. *Medicine & Science in Sports & Exercise* 2000;32(9):S498-  
4 713 S516.
- 5 714 58. Genel F, Kale M, Pavlovic N, et al. Health effects of a low-inflammatory diet in adults with arthritis: a  
6 715 systematic review and meta-analysis. *J Nutr Sci* 2020;9:e37. doi: 10.1017/jns.2020.31 [published  
7 716 Online First: 2020/09/29]
- 8 717 59. Lynggaard H, Bell J, Lösch C, et al. Principles and recommendations for incorporating estimands into  
9 718 clinical study protocol templates. *Trials* 2022;23(1):685. doi: 10.1186/s13063-022-06515-2  
10 719 [published Online First: 2022/08/20]
- 11 720 60. White IR, Kalaitzaki E, Thompson SG. Allowing for missing outcome data and incomplete uptake of  
12 721 randomised interventions, with application to an Internet-based alcohol trial. *Statistics in  
13 722 Medicine* 2011;30:3192-207.
- 14 723 61. Qualitative data analysis for applied policy research; 2002.
- 15 724 62. Peiris CL, Culvenor AG. Metabolic syndrome and osteoarthritis: implications for the management of  
16 725 an increasingly common phenotype. *Osteoarthritis and Cartilage* 2023;Online ahead of print  
17 726  
18 727

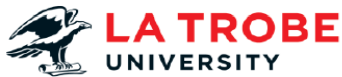

## Participant Information Sheet/Consent Form

Interventional study - Adult providing own consent

|                                                                    |                                                                                                                                                                                                                                                                                                                                                                                                                                                                                    |
|--------------------------------------------------------------------|------------------------------------------------------------------------------------------------------------------------------------------------------------------------------------------------------------------------------------------------------------------------------------------------------------------------------------------------------------------------------------------------------------------------------------------------------------------------------------|
| <b>Title</b>                                                       | Optimising outcomes for people with knee pain through food: FEAST randomised controlled trial                                                                                                                                                                                                                                                                                                                                                                                      |
| <b>Short Title</b>                                                 | The FEAST trial                                                                                                                                                                                                                                                                                                                                                                                                                                                                    |
| <b>Ethics Reference Number</b>                                     | HEC22044                                                                                                                                                                                                                                                                                                                                                                                                                                                                           |
| <b>Project Sponsor</b>                                             | La Trobe University                                                                                                                                                                                                                                                                                                                                                                                                                                                                |
| <b>Coordinating Principal Investigator/ Principal Investigator</b> | Dr Adam Culvenor (School of Allied Health, Human Services and Sport (SAHHSS), La Trobe University)                                                                                                                                                                                                                                                                                                                                                                                 |
| <b>Associate Investigator(s)</b>                                   | Dr Brooke Devlin (School of Human Movement and Nutrition Sciences, University of Queensland)<br>Prof. Peter Brukner (SAHHSS, La Trobe University)<br>Ass. Prof. Joanne Kemp (SAHHSS, La Trobe University)<br>Prof. Kay Crossley (SAHHSS, La Trobe University)<br>Dr Andrea Mosler (SAHHSS, La Trobe University)<br>Dr Josh Heerey (SAHHSS, La Trobe University)<br>Ms Lynette Law (PhD student, SAHHSS, La Trobe University)<br>Ms Amanda Attanayake (SAHHSS, La Trobe University) |
| <b>Location</b>                                                    | La Trobe University                                                                                                                                                                                                                                                                                                                                                                                                                                                                |

### Part 1 What does my participation involve?

#### 1 Introduction

You are invited to take part in this research project because you have knee pain. This research project aims to assess the effectiveness of two different programs provided through advice and education by a qualified dietitian to improve your knee pain, function and quality of life.

This information sheet tells you about the research project. It explains the tests and treatments involved. Knowing what is involved will help you decide if you want to take part in the project. Please read this information carefully. Ask questions about anything that you don't understand or want to know more about. Before deciding whether or not to take part, you might want to talk about it with a relative, friend or your local doctor.

#### ***Your participation is voluntary***

Participation in this research is completely voluntary and there will be no cost to you. If you don't wish to take part, you don't have to. If you decide you want to take part, you will be given a copy of this Participant Information Sheet and asked to sign the consent section. By signing it you are telling us that you:

- Understand what you have read
- Consent to take part in the research project
- Consent to have the tests and treatments that are described
- Consent to the use of your personal and health information as described.

You will be given a copy of this Participation Information Sheet and Consent Form to keep.



## 2 What is the purpose of this research?

As you may be aware, knee pain is very common and is often associated with knee osteoarthritis. Osteoarthritis is the most common form of arthritis and is a leading cause of disability in Australia. Currently, there is no cure for osteoarthritis, therefore it is important to investigate treatments that can improve the main symptoms associated with osteoarthritis: pain, swelling, stiffness and movement difficulties. We will recruit 140 adults who have knee pain.

This study is being conducted by researchers at La Trobe University and is partly funded by the National Health and Medical Research Council (NHMRC) of Australia and Dr Peter Brukner. All assessments and consultations will be at **no cost** to you.

## 3 Who can participate?

You can participate in this study if you meet all the following:

- Between 45-85 years of age and understand written and spoken English
- Activity-related knee pain on most days of the past month
- Knee pain for at least 3 months
- No morning knee stiffness, or morning stiffness that lasts less than 30mins
- Willing to complete the assigned 12-week eating program and attend all appointments (detailed below)

You are not eligible and cannot participate in this study if you meet any of the following:

- Knee pain not primarily due to osteoarthritis (e.g., fibromyalgia, referred pain)
- Bilateral knee replacement
- Already strictly following a specific diet (e.g., low-carb, paleo, Mediterranean, Vegan)
- Received treatment from a dietitian, or knee injection, in the past 3 months
- Experienced  $\geq 5$ kg weight loss in the past 3 months or body weight  $\geq 200$ kg
- Planning to have knee surgery in the next 6 months
- Pregnant or breastfeeding
- History of psychiatric or eating disorder (excluding anxiety/depression) or bariatric surgery

## 4 What does participation in this research involve?

This study will be conducted over 6 months in total (see flowchart on next page).

### ***Pre-baseline (online/phone) appointment***

You will be asked to attend a 30-minute Zoom/telephone appointment prior to your first face-to-face appointment. At this appointment, we will discuss the consent form, outline the fasting process needed to complete your blood test and DEXA scan, and answer any questions you might have. We will also explain how to complete a 3-day food diary, which will be done using a smart phone application or paper-based food diary (personal preference).

### ***Baseline (first) appointment***

This appointment will be arranged at a convenient time for you at La Trobe University, Bundoora and will take approximately 2 hours. You will be asked to not eat/drink anything or conduct any exercise in the morning of your appointment (i.e., fasting for 12-hours) for the purpose of a blood test. At the appointment, we will assess your:

- Height, weight, waist circumference and blood pressure
- Body composition measured via a Dual-energy X-ray Absorptiometry Scan (DEXA).  
This involves laying on the scanner bed for ~7 mins. The machine uses small doses (<1% yearly dose) of radiation to assess tissue density (how much muscle and adipose tissue you have). The total effective dose of radiation has been calculated by a Medical Physicist (see risks below). Light clothing with no metal (e.g., zips, clips, underwire) should be worn (gown provided if needed). All measures will be taken by trained

researchers who hold Victorian Government radiation licenses and comply to the Code of Practice set out by the Australian Radiation Protection and Nuclear Safety Agency.

- Blood test: A trained researcher qualified to take blood will collect a small amount of blood (~25 mL, equivalent to ~4 teaspoons) from a forearm vein to assess inflammation levels.
- Questionnaires assessing your pain, activity level and quality of life and food intake
- Functional tests: i) how many times you can stand from a chair in 30 secs; and ii) how fast you can walk 40 metres.

We will provide a snack/drink as soon as you complete the DEXA and blood tests.

### **Random assignment to one of two different treatments**

At the end of the first appointment at La Trobe University, you will be randomly assigned (50:50 chance, like a coin toss) to receive a program (from qualified dietitians) to either:

- minimise processed foods that are known to promote inflammation and optimise foods shown to reduce inflammation; or
- minimise foods that are known to be high in fat content.

This means neither you nor the researchers will be able to choose which group you are assigned to. We do not know which treatment is best; to find out we need to compare the two programs. Although the two programs involve modifying some types of food that you eat, you can eat as much as you like of these foods. **You do not need to restrict the amount of food that you eat.**

Irrespective of which group you are assigned to, you will receive specific education and advice from an Accredited Practising Dietitian (APD) in a dietary consultation at the start of the study (at the end of your first appointment at La Trobe University). Your dietitian will also work with you to develop a personalised management plan to support you throughout the study. You will be asked to follow the program for 12 weeks (but you can continue for as long as you like). We will ask you to record your food intake for 3 days at up to six different times throughout the study.

### **Support phone calls**

To support you throughout the study and answer any questions you have, we will arrange up to four follow-up consultations to be conducted over the phone/online during the 12 weeks. This phone call will take approximately 15-20 minutes. At these times, we will also ask you to complete some of the same questionnaires online (via a secure link provided by e-mail).

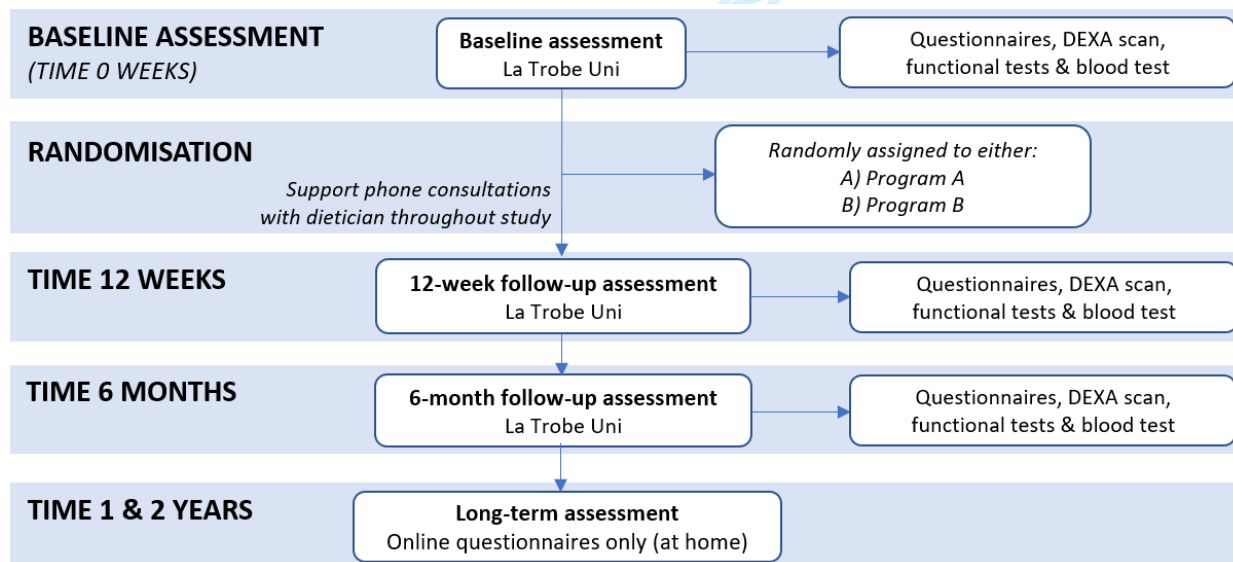

**Figure 1. Flowchart of study assessments**

### **Follow-up appointments**

So that we can assess the results of the program you have been assigned, we will ask you to return for face-to-face appointments at La Trobe University at **12 weeks and 6 months after your first appointment.** These follow-up appointments will be like the first appointment where

1 we will do all the same tests and questionnaires. You will need to fast (not eat/drink anything) the  
2 morning of your appointment for the blood test. You will have another dietary consultation with  
3 the study dietitian who will provide support for you to continue with the program you have been  
4 assigned. You should allow about 2 hours for these appointments. To assess longer-term results,  
5 we will ask you to complete the same online questionnaires at 1 and 2 years after your first  
6 appointment. The total time commitment for participating will be approximately 6-8 hours.  
7

8  
9 There are no additional costs associated with participating in this research project. All medical  
10 care and tests (i.e., dietitian consultations, DEXA scan, blood tests) required as part of the  
11 research project will be provided free of charge. The results of the DEXA scan and blood tests  
12 will not be used to diagnose health conditions, but only to evaluate the effects of the intervention.  
13 We will provide you with your individual results when the DEXA and blood analyses are completed  
14 at the end of the study. Your travel costs to attend the assessments will be reimbursed up to \$100.  
15

16  
17 At the end of the first 12 weeks, or after 6-12 months, we may also ask if you are willing to have  
18 a separate interview with one of the study researchers (this interview is optional and you can take  
19 part in the study without needing to complete the interview). The purpose of this interview is to  
20 seek feedback on the study treatments, satisfaction with the process received and whether there  
21 are any suggestions for improvement. The interview will take approximately 30 minutes, but you  
22 can cease the interview at any time. To ensure responses are correctly interpreted, responses to  
23 questions will be audio recorded and transcribed. Audio recording transcriptions will be completed  
24 by 'Transcription Australia' on their secure, encrypted Australian-based software. Although voice  
25 in your audio recording could lead to your identification, this file will not be used during analysis.  
26 Instead, a re-identifiable transcription, which you will have the opportunity to check for accuracy,  
27 will be used for analysis. Re-identifiable means that we will use a code number and not your name  
28 on data collected to ensure your anonymity. Following the completion of analysis of this  
29 transcription, the audio file associated with your interview will be deleted. After analysis, overall  
30 findings and conclusions from all interviews will also be sent to you, to allow an opportunity to  
31 make any further comments. We will seek around 40 participants to be interviewed. It is your  
32 decision or not whether you wish to be interviewed.  
33

## 34 35 **5 What are the alternatives to participation?**

36  
37 You do not have to take part in this research project to receive treatment for your knee. Other  
38 options are available; these include seeing a physiotherapist or dietitian (e.g., private or public  
39 health centre). The research team will discuss these options with you before you decide to take  
40 part in this project. You can also discuss the options with your doctor, dietitian or physiotherapist.  
41

## 42 43 **6 What are the possible benefits of taking part?**

44  
45 We cannot guarantee or promise that you will receive any benefits from this research. However,  
46 possible benefits may include improvement of pain, function, quality of life, physical activity, and  
47 confidence in your knee. You may gain valuable insight into how to manage your food intake and  
48 specific anti-inflammatory and low-fat foods, nutrients and eating habits. The expected benefit to  
49 society is the development of a drug-free and non-invasive treatment option to help manage pain  
50 and disability associated with osteoarthritis. This will give doctors and patients alternative ways  
51 to manage knee pain, which in turn may lead to improvements in the quality of life for patients.  
52  
53

## 54 55 **7 What are the possible risks and disadvantages of taking part?**

56  
57 With any medical treatment there are: (i) risks we know about; (ii) risks we don't know about; and  
58 (iii) risks we don't expect. We have listed the risks we know about below. You may have none,  
59 some or all the effects listed below, and they may be mild, moderate or severe. If you have any  
60 of these side effects, or are worried about them, talk with the study coordinator.



| Possible Side Effect                                                                      | How often is it likely to occur?                                                        | How severe might it be? | How long might it last?                       |
|-------------------------------------------------------------------------------------------|-----------------------------------------------------------------------------------------|-------------------------|-----------------------------------------------|
| <b>Emotional distress due to involvement in research and completion of questionnaires</b> | Rarely; although can occur when completing study questionnaires                         | Minimal                 | While completing the study questionnaires     |
| <b>Emotional distress due to diet assessment</b>                                          | Rarely; although can occur when assessing food intake prior to, or during, appointments | Minimal                 | While completing the food diary or assessment |
| <b>Discomfort due to body measurements</b>                                                | Can occur while measurements are done by your dietitian or researcher                   | Minimal<br>Mild         | During appointment only                       |
| <b>Discomfort due to blood test</b>                                                       | Rarely; while blood is being collected                                                  | Mild                    | Bruising or swelling may last 1-3 days        |
| <b>Exposure to ionising radiation</b>                                                     | 1x 7-minute scan at initial, 12-week and 6-month appointment                            | Minimal                 | Effect too small to measure                   |
| <b>Tiredness/change in bowel patterns with change in diet</b>                             | Any change in diet can make you feel tired or have different bowel patterns             | Minimal                 | 1-2 weeks                                     |
| <b>Contraction of COVID-19</b>                                                            | Can occur during the face-to-face assessments                                           | Minimal<br>Moderate     | 1-2 weeks                                     |

If you become upset or distressed because of your participation in the research, the study coordinator together with the qualified dietitian will assist you with appropriate support. We can also provide you information about services you can access to seek help for emotional distress.

#### **Risks associated with completing study questionnaires and diet assessment**

Completing questionnaires about your knee pain, function, quality of life and dietary intake may cause emotional distress. If you begin to feel upset or distressed when completing your questionnaires or dietary assessment, please let a member of the research team know. We will provide you with the appropriate support, including a document outlining services you can access to help with your emotional distress.

#### **Risks associated with blood test**

Having a blood sample taken may cause some discomfort or bruising. On very rare occasions, the blood vessel may swell, or blood may clot in the blood vessel, or the spot from which blood is taken could become inflamed. Some people may feel light-headed when having blood taken and may occasionally faint. Very rarely, there could be a minor infection or bleeding. A qualified person will take a very small amount of your blood (max 30mL each appointment (normal blood donation is 500mL)) using stringent infection control procedures. If you notice increased redness, swelling or other signs of infection in the days following your assessment, tell us immediately.

#### **Risks associated with eating low-inflammatory foods or low-fat foods**

As you adjust to the eating program you are assigned to, you may experience feelings of tiredness and/or changes in bowel habits and patterns. The researchers will assess your diet and ensure you are meeting your energy and nutrient needs throughout the study intervention. This eating program may be different than your normal diet and therefore influence your usual weekly shopping bill and expenses. As part of the consultations, you will be provided with some advice on how to follow the diet on a budget if required to ensure there is minimal financial burden.

#### **Exposure to ionising radiation**

If you choose to take part in this research, you will undergo three 7-minute DEXA scans (first, 12-week and 6-month assessments). DEXA scans are a non-invasive, fast and simple procedure. This research study involves exposure to a very small amount of radiation from a DEXA scan that you would not normally receive. As part of everyday living, everyone is exposed to naturally occurring background radiation and receives a dose of about 2 millisieverts (mSv) each year. The effective dose you will receive from all of these DEXA scans is approximately 0.03 mSv. At these

1 dose levels, no harmful effects of radiation have been demonstrated as any effect is too small to  
2 measure. The risk is believed to be minimal.  
3

4  
5 The scans we are taking are for research purposes and are not intended to be used like scans  
6 taken for a full clinical examination or to be used to help diagnose, treat or manage a particular  
7 condition. The whole-body DEXA scan may identify participants with a low bone mineral density.  
8 However, a whole body DEXA scan is not the established method for detecting low bone mineral  
9 density. Therefore, as a precaution if you are identified as having a low bone mineral density you  
10 will be encouraged to make an appointment with your General Practitioner to discuss the results.  
11

12 Have you been involved in any other research studies that involve radiation? If so, please tell us.  
13 Please keep information contained within this Patient Information Sheet about your exposure to  
14 radiation in this study, including the radiation dose, for at least 5 years. You will be required to  
15 provide this dose to researchers of any future research projects involving exposure to radiation.  
16

### 17 **Contraction of COVID-19**

18 You may be at risk of contracting COVID-19 during one of the face-to-face appointments at La  
19 Trobe University. Prior to attending La Trobe University, you will be screened for signs and  
20 symptoms of COVID-19 by a member of the research team. You will also need to be fully  
21 vaccinated (or hold a valid medical exemption) to be able to attend La Trobe University for your  
22 assessments. The research team will put in place the appropriate control measures to reduce the  
23 risk of COVID 19 transmission. The risk is believed to be minimal.  
24

## 25 **8 What if I withdraw from this research project?**

26  
27 You are under no obligation to continue with the research study. You may change your mind at  
28 any time about participating in the research. People withdraw from studies for various reasons,  
29 and you do not need to provide a reason.  
30

31  
32 You can withdraw from the study at any time by completing and signing the 'Participant  
33 Withdrawal of Consent Form'. This form is provided at the end of this document and is to be  
34 completed by you and supplied to the research team if you choose to withdraw at a later date.  
35

36  
37 If you withdraw from the study, you will be able to choose whether the study will destroy or retain  
38 the information it has collected about you. Information about you that has already been analysed  
39 (i.e., once you have been allocated to either program), may not be able to be destroyed to ensure  
40 accurate and unbiased study reporting. Personal details collected, such as your name and contact  
41 details, can be destroyed at any time upon study withdrawal.  
42

## 43 **9 What happens when the research project ends?**

44  
45 At the completion of the research project, you may continue to use the resources provided and to  
46 follow the eating program principles if you choose to. If requested, we will provide you with your  
47 individual results including your body composition (DEXA) assessment and whole study results.  
48 We, or other researchers, may also use coded information (so that you cannot be identified)  
49 collected for this research study in future related studies. If you consent (tick the box on the  
50 consent form) to be contacted for future related research, we will store your contact details (name,  
51 address, phone number, email) on the secure La Trobe University research drive, only accessible  
52 to members of the research team, and may contact you about future related research projects.  
53  
54  
55

## 56 **Part 2 How is the research project being conducted?**

### 57 **10 What will happen to information about me?**

1 By signing the consent form you agree to the relevant research staff collecting and using personal  
2 information about you for the research project. Any information obtained in connection with this  
3 research project that can identify you will remain confidential and securely stored. It will be  
4 disclosed only with your permission, or in compliance with the law.  
5

### 6 **Storage, retention and destruction**

7 The anonymity of your participation is assured with our procedure, in which a code number (not  
8 your name) will identify you. Data will be kept securely at La Trobe University in a locked filing  
9 cabinet and password protected research computer. Identifiable data will be stored for 15 years,  
10 then destroyed (electronic records deleted, paper-files shredded). Data will be strictly handled  
11 confidentially under guidelines set out by the National Health and Medical Research Council. The  
12 principal investigator (Dr Adam Culvenor) is responsible for maintaining this confidentiality.  
13

14  
15 In accordance with relevant Australian and/or Victorian privacy and other relevant laws, you have  
16 the right to request access to your information collected and stored by the research team. You  
17 also have the right to request that any information with which you disagree be corrected.  
18

19 The results of this project may be published and/or presented in a variety of forums and used by  
20 research students to obtain a research degree. In any publication, presentation or data files  
21 shared with other researchers, information will be provided in such a way that you cannot be  
22 identified, except with your permission.  
23

## 24 **11 Who is organising and funding the research?**

25 This research project is being conducted by Dr Adam Culvenor and a team of researchers. It has  
26 been funded by the NHMRC (GNT2008523) and Dr Peter Brukner. Dr Peter Brukner is also an  
27 investigator on the project and has written a book and developed an app that will be used as part  
28 of the study. He will not be involved in data collection, analysis or the decision to publish results.  
29 No member of the research team will receive a personal financial benefit from your involvement  
30 in this research project (other than their ordinary wages).  
31

## 32 **12 Who has reviewed the research project?**

33 All research in Australia involving humans is reviewed by an independent group of people called  
34 a Human Research Ethics Committee (HREC). The ethical aspects of this research project have  
35 been approved by the HREC of La Trobe University Human Ethics Committee.  
36

37 This project will be carried out according to the *National Statement on Ethical Conduct in Human  
38 Research (2018)*. This statement has been developed to protect the interests of people who agree  
39 to participate in human research studies.  
40

## 41 **13 Further information and who to contact**

42 For all enquiries, you can contact the Clinical Trial Manager, during business hours:  
43 Dr Adam Culvenor, Senior Research Fellow in Physiotherapy, La Trobe University  
44 Telephone: 03 9479 5116; E-mail: a.culvenor@latrobe.edu.au  
45

46 If you have any complaints about any aspect of the project, the way it is being conducted or any  
47 questions about being a research participant in general, then you may contact:  
48

49 Reviewing HREC: La Trobe University Human Research Ethics Committee  
50 Complaints Contact: Senior Human Ethics Officer, Ethics and Integrity, Research Office  
51 Telephone: 03 9479 1443 E-mail: humanethics@latrobe.edu.au  
52

53 \* Please quote the application reference number HEC22044  
54

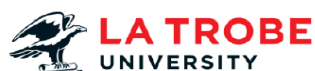

## Consent Form - *Adult providing own consent*

|                                                                        |                                                                                                                                                                                                                                                                                                                                                                                  |
|------------------------------------------------------------------------|----------------------------------------------------------------------------------------------------------------------------------------------------------------------------------------------------------------------------------------------------------------------------------------------------------------------------------------------------------------------------------|
| <b>Title</b>                                                           | Optimising outcomes for people with knee pain through food: FEAST randomised controlled trial                                                                                                                                                                                                                                                                                    |
| <b>Short Title</b>                                                     | The FEAST trial                                                                                                                                                                                                                                                                                                                                                                  |
| <b>Ethics Reference Number</b>                                         | HEC22044                                                                                                                                                                                                                                                                                                                                                                         |
| <b>Project Sponsor</b>                                                 | La Trobe University                                                                                                                                                                                                                                                                                                                                                              |
| <b>Coordinating Principal Investigator/<br/>Principal Investigator</b> | Dr Adam Culvenor (La Trobe University)                                                                                                                                                                                                                                                                                                                                           |
| <b>Associate Investigator(s)</b>                                       | Dr Brooke Devlin (University of Queensland)<br>Prof. Peter Brukner (La Trobe University)<br>Ass. Prof. Joanne Kemp (La Trobe University)<br>Prof. Kay Crossley (La Trobe University)<br>Dr Andrea Mosler (La Trobe University)<br>Dr Josh Heerey (La Trobe University)<br>Ms Lynette Law (PhD student, La Trobe University)<br>Ms Amanda Attanayake (SAHSS, La Trobe University) |
| <b>Location</b>                                                        | La Trobe University                                                                                                                                                                                                                                                                                                                                                              |

### Consent Agreement

I have read the Participant Information Sheet and I understand the purposes, procedures and risks of the research described in the project.

I understand that data files may be shared with other researchers, and that information will be provided in such a way that I cannot be identified, except with my permission.

I have had an opportunity to ask questions and I am satisfied with the answers I have received. I freely agree to participate in this research project as described and understand that I am free to withdraw at any time during the study without affecting my future health care.

I understand that, if I decide to discontinue the study treatment, I may be asked to attend follow-up visits to allow collection of information regarding my health status. I agree that data gathered for the study may be published provided my name or other identifying information is not used.

- I wish... /  do not wish... to receive results of the study
- I consent... /  do not consent... to be contacted for future related research
- I consent... /  do not consent... to have my interview responses audio-recorded/transcribed.
- I consent... /  do not consent... to have my samples/data used in future research

I understand that I will be given a signed copy of this document to keep.

Name of Participant (please print) \_\_\_\_\_

Signature \_\_\_\_\_ Date \_\_\_\_\_

### Declaration by Researcher<sup>†</sup>

I have given a verbal explanation of the research project, its procedures and risks and I believe that the participant has understood that explanation.

Name of Researcher<sup>†</sup> (please print) \_\_\_\_\_

Signature \_\_\_\_\_ Date \_\_\_\_\_

<sup>†</sup> An appropriately qualified member of the research team must provide the explanation of, and information concerning, the research project.

1  
2  
3 FEAST Project  
4  
5

---

6 **Standard Operating Procedure**  
7

8  
9 **Blood collection, processing, handling, and storage procedures**  
10

---

11  
12  
13  
14  
15  
16  
17  
18  
19  
20  
21  
22  
23  
24  
25  
26  
27  
28  
29  
30  
31  
32  
33  
34  
35  
36  
37  
38  
39  
40  
41  
42  
43  
44  
45  
46  
47  
48  
49  
50  
51  
52  
53  
54  
55  
56  
57  
58  
59  
60

For peer review only

## 1.1 Purpose

The purpose of the current SOP is to provide step-by-step instructions on the exact procedures that the research team needs to follow for conducting venous blood collection for biochemical analysis at baseline and follow-up examination.

## 1.2 General procedures for venous blood collection

Venous blood samples will be obtained from each participant for biochemical analysis following a 12-hour overnight fast, at baseline (T1), 12 weeks (T2) and 6 months (T3) (figure 1)

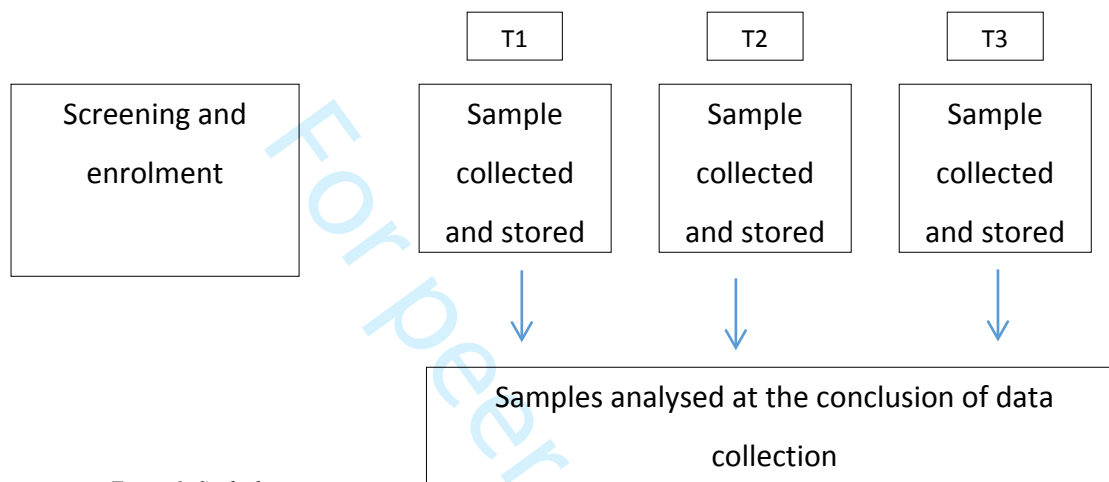

Figure 1: Study design

The researcher will perform venepuncture to obtain no more than 30mL of blood.

### 1.2.1 Consumables and supplies required for performing venepuncture

The consumables and supplies that will be used for performing the venepuncture in the study are the following:

- Disposable Latex gloves must be worn by the researcher and anyone else assisting with blood collection.
- Alcohol swab will be used to clean the venepuncture site.
- Winged steel needles appropriate for adults with an extension tube (a butterfly) will be used. The butterfly will have either a syringe or an evacuated tube with an adaptor. Sterile gauze pads will.....
- Adhesive hypo allergic bandages (plasters or Band-Aids) will be applied to the puncture site to minimize the risk of infection.
- Plastic Bag for Waste will be used to dispose all of the biohazardous waste generated as well as a sharps biocontainer to dispose of all needles.

### 1.2.2 Steps in obtaining venous blood from the participant

The steps for obtaining venous blood samples from the study participants are provided below:

**Step 1:** Complete general preparation.

- Find an indoor site to encourage privacy during blood collection. The site should have a table or other piece of furniture with a flat surface where you can lay out all consumables/ supplies. An examination bed should be readily available if the respondent feels faint and needs to lie down.
- Ensure that each subject has completed a 10-hour fast.



- Wash and dry hands, put on gloves before initiating blood collection from the participant.
- Take out a clean absorbent paper sheet and spread it over a flat surface to lay out consumable and supplies.

**Step 2:** Prepare the participant for the venepuncture.

- The individual should be seated comfortably in a chair with arm extended on the slanting armrest to form a straight line from the shoulder to the wrist. The arm and elbow should be supported firmly by the armrest and should not be bent at the elbow.
- Ask each volunteer if they have a history of fainting. If so, ensure that the blood sample is only drawn whilst the subject is lying down on a bed.
- Describe to the participant exactly what will be done during the collection of the blood sample.

**Step 3:** Prepare the venepuncture site.

- Apply (tighten) tourniquet.
- Ask the participant to close his/her hand so that the veins will become more prominent and thus easier to enter. Vigorous hand exercise or "pumping" should be avoided.
- Select the vein site. Palpate and trace the path of veins several times with the index finger. If superficial veins are not readily apparent, blood can be forced into the vein by gently massaging the arm from wrist to elbow. Several sharp taps at the vein site with index and second finger will cause the vein to dilate.
- Loosen tourniquet.
- The venepuncture site must be cleansed once with an alcohol swab to prevent any chemical or microbiologic contamination of either the patient or the specimen.
- Check equipment, tube selection and thread needle (or butterfly) securely onto tube holder (barrel).
- Re-apply the tourniquet and relocated vein position and direction. A tourniquet allows the veins to fill with blood, thus making the veins more prominent and easier to enter. Do not leave the tourniquet on for longer than 1 minute otherwise it may result in either hemoconcentration or variation in blood test values.
- Remove needle cover and check bevel is orientated uppermost.

**Step 4:** Blood drawing

- Puncture the skin 3–5 mm away from the vein; this allows good access without pushing the vein away.
- If the needle enters alongside the vein rather than into it, withdraw the needle slightly without removing it completely, and angle it into the vessel.
- Insert the tube into the holder and commence filling the tubes.
- Draw blood slowly and steadily.
- Release the tourniquet as soon as blood flow is established. Tourniquet release allows the blood circulation to return to normal and also reduces bleeding at the venipuncture site.
- Remove the tube from the holder and invert (8-10 times) to mix the blood with tube additives. Place blood samples on ice if required..
- Place a cotton wool above the venepuncture site, withdraw the needle and apply pressure.
- Dispose of needle in a sharps container.
- Check site and apply an adhesive bandage.
- Label all tubes immediately.

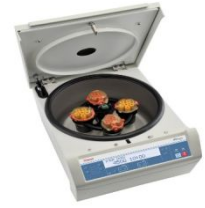

### 1.3 Blood processing and handling

#### 1.3.1 Centrifuge procedure

Collected venous blood will be centrifuged and the extracted plasma and/or serum will be pipetted into aliquots according to the blood collection protocol.

- Set up in a well-ventilated environment, on a horizontally levelled and rigid surface with adequate load-bearing capacity.
- As safety zone maintain a clear radius of at least 30 cm around the centrifuge. Do not place any dangerous substances within this security zone.
- Open the centrifuge door by pressing the open button.
- Place the remaining tubes containing blood into appropriate sized adapters.
- Place the tubes containing water in opposite adapters, where they should mirror the placement of the tubes holding blood.
- Never place both tubes housing water and blood into the same adapters but should be placed in different adapters for even weight distribution.
- Place the adapters carefully and gently into the rotor buckets
- Seal the buckets with the lids and close the centrifuge.
- Use only with rotors which have been loaded properly.
- Make sure the rotor is locked properly into place before operating the centrifuge.
- Never overload the rotor.
- Never start the centrifuge when the centrifuge door is open.
- Do not lean on the centrifuge.
- Do not place anything on top of the centrifuge during a run.
- Gently close the centrifuge door. The centrifuge door mechanism will click and lock in place.
- Turn on the centrifuge by pressing the start button.
- Select the required speed and time from preprogrammed setting or manually using the arrow keys (3000xg for 10 mins for each tube).

Once the centrifuge has completely stopped spinning wait for an audible sound and then open the centrifuge. Remove the tubes from the centrifuge and place them in a tube rack.

#### 1.3.2 Handling of collected blood

Three different types of test tubes will be used per study participant to collect venous blood. The collected blood will be designated for whole blood, or plasma and serum separation. One 8ml EDTA tube (with added anticoagulant) will be used to collect whole blood for analysis, one 6ml heparin tube will be used for plasma extraction, and one 8.5ml SST tube will be used for serum extraction. Tubes will be labelled with study timepoint (T1, T2 or T3), participant ID, and type of sample. All information regarding blood collection tubes is presented in Table 1.

**Table 1.** Volume of blood in different test tubes

| Test tube           | Blood volume | Designated for:           |
|---------------------|--------------|---------------------------|
| EDTA tube           | 6 ml         | Whole blood               |
| Heparin gel tube    | 6 ml         | Heparin plasma extraction |
| SST tube            | 8.5 ml       | Serum extraction          |
| <b>Total blood:</b> | 22.5ml       |                           |



- The whole blood sample (6ml) collected in the EDTA tube will be stored at -80°C, as indicated in Table 2.

**Table 2.** Volumes and use of EDTA whole blood sample.

| Whole blood aliquot no. | EDTA volume | Designated for the analysis of: |
|-------------------------|-------------|---------------------------------|
| 1                       | 6 ml        | HbA1c                           |

- The blood (8.5ml) collected in the SST tube will be left to separate at room temperature for 20 mins and then centrifuged at 3000 rpm for 10 min. The extracted (heparin) plasma will be pipetted into 4 aliquots of 1 ml (considering a 50% efficiency of centrifugation in plasma extraction). One aliquot of 1ml will be used for determining glucose, insulin, lipids, LFT and hsCRP, while the 3 aliquots of 1ml each will be stored at -80°C, as indicated in Table 3.

**Table 3.** Volumes and use of SST plasma aliquots.

| Plasma aliquot no. | EDTA plasma volume | Designated for the analysis of:      |
|--------------------|--------------------|--------------------------------------|
| 1                  | 1000 µl            | Glucose, insulin, lipids, LFT, hsCRP |
|                    |                    | <b>Designated for:</b>               |
| 2                  | 1000 µl            | Storage at -80°C                     |
| 3                  | 1000 µl            | Storage at -80°C                     |
| 4                  | 1000 µl            | Storage at -80°C                     |

- The blood (6 ml) collected in the heparin tube will be centrifuged at 3000 rpm for 10 min and the extracted plasma will be pipetted into 3 aliquots of 600 µl (considering a 50% efficiency of centrifugation in plasma extraction). One aliquot of 600 µl will be used for determining cytokine concentrations, while the remaining 3 aliquots of 500 µl each will be stored at -80°C, as indicated in Table 4.

**Table 4.** Volumes and use of heparin plasma aliquots.

| Plasma aliquot no. | Heparin plasma volume | Designated for the analysis of:               |
|--------------------|-----------------------|-----------------------------------------------|
| 1                  | 1ml                   | Cytokines (IL-1β, IL-6, IL-8, IL-10, and TNF) |
|                    |                       | <b>Designated for:</b>                        |
| 2                  | 1ml                   | Storage at -80°C                              |
| 3                  | 1ml                   | Storage at -80°C                              |
| 4                  | 1ml                   | Storage at -80°C                              |

**NOTE:** It is essential that ONLY NON-HAZARDOUS waste be placed in the wastepaper/ general rubbish bins. Pipette tips should be disposed in sharps containers, whereas laboratory and associated waste directly involved in specimen processing (i.e blood collection tubes, gloves etc) must be disposed in biological waste bags.

#### 1.4 Blood storage

Eppendorf tubes or screw cap tubes must be clearly labelled with identification, media used and date, placed in a freezer well rack and should not be stored for long periods on a bench, but must be transferred with an ice esky box to a dedicated storage area (i.e. refrigerator, cold room or cupboard) as soon as possible.

Laboratory coats must be removed and hung up before leaving laboratory areas and should be laundered once a week. Hands must be washed with an antibacterial agent BEFORE leaving laboratory (Hibiclens/Microshield or equivalent, followed by extensive rinsing).

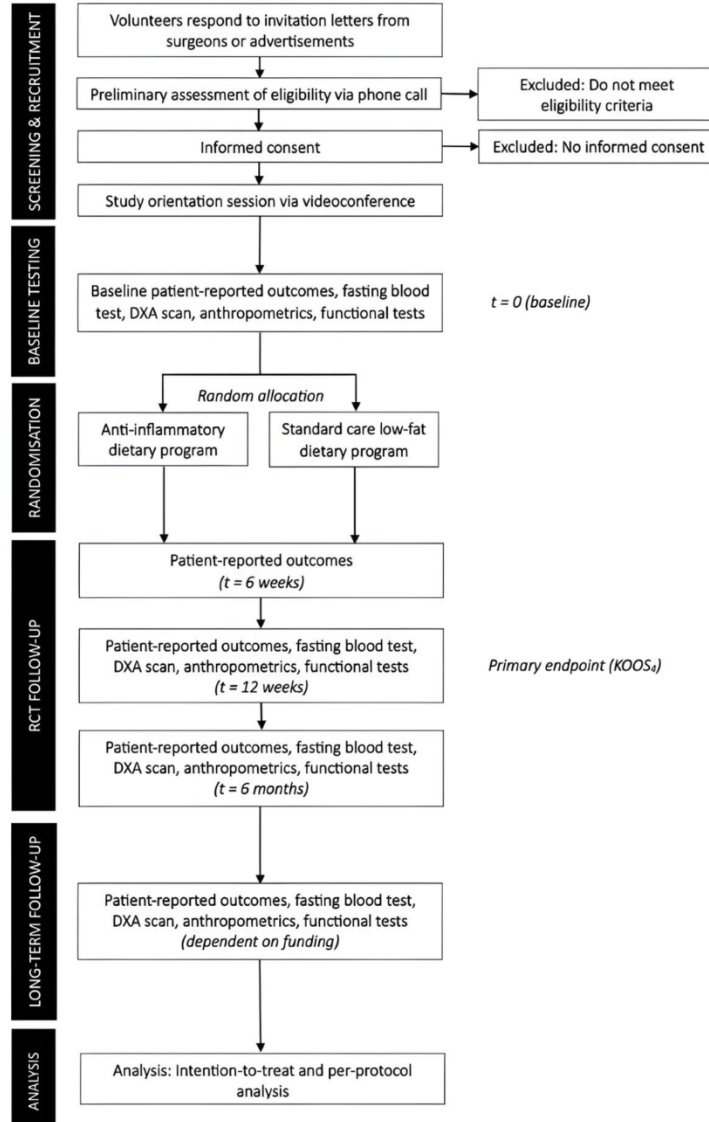

Figure 1. Flow of participants through the trial. DXA, Dual X-ray Absorptiometry; KOOS, Knee injury and Osteoarthritis Outcome Score

\*Optional qualitative interview for process evaluation at 6 months

529x695mm (96 x 96 DPI)

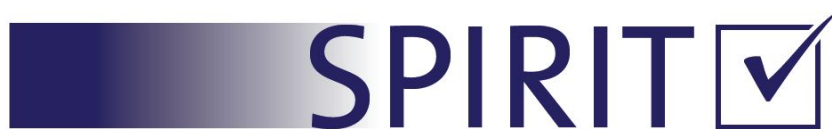

STANDARD PROTOCOL ITEMS: RECOMMENDATIONS FOR INTERVENTIONAL TRIALS

SPIRIT 2013 Checklist: Recommended items to address in a clinical trial protocol and related documents\*

| Section/item                                              | Item No | Description                                                                                                                                                                                                                                                                              |                         |
|-----------------------------------------------------------|---------|------------------------------------------------------------------------------------------------------------------------------------------------------------------------------------------------------------------------------------------------------------------------------------------|-------------------------|
| <b>Administrative information</b>                         |         |                                                                                                                                                                                                                                                                                          |                         |
| Title                                                     | 1       | Descriptive title identifying the study design, population, interventions, and, if applicable, trial acronym                                                                                                                                                                             | 1                       |
| Trial registration                                        | 2a      | Trial identifier and registry name. If not yet registered, name of intended registry                                                                                                                                                                                                     | 3                       |
|                                                           | 2b      | All items from the World Health Organization Trial Registration Data Set                                                                                                                                                                                                                 | ACTRN1262200<br>0440729 |
| Protocol version                                          | 3       | Date and version identifier                                                                                                                                                                                                                                                              | NA                      |
| Funding                                                   | 4       | Sources and types of financial, material, and other support                                                                                                                                                                                                                              | 21                      |
| Roles and responsibilities                                | 5a      | Names, affiliations, and roles of protocol contributors                                                                                                                                                                                                                                  | 21                      |
|                                                           | 5b      | Name and contact information for the trial sponsor                                                                                                                                                                                                                                       | 1                       |
|                                                           | 5c      | Role of study sponsor and funders, if any, in study design; collection, management, analysis, and interpretation of data; writing of the report; and the decision to submit the report for publication, including whether they will have ultimate authority over any of these activities | 21                      |
|                                                           | 5d      | Composition, roles, and responsibilities of the coordinating centre, steering committee, endpoint adjudication committee, data management team, and other individuals or groups overseeing the trial, if applicable (see Item 21a for data monitoring committee)                         | NA                      |
| <b>Introduction</b>                                       |         |                                                                                                                                                                                                                                                                                          |                         |
| Background and rationale                                  | 6a      | Description of research question and justification for undertaking the trial, including summary of relevant studies (published and unpublished) examining benefits and harms for each intervention                                                                                       | 4                       |
|                                                           | 6b      | Explanation for choice of comparators                                                                                                                                                                                                                                                    | 4-5                     |
| Objectives                                                | 7       | Specific objectives or hypotheses                                                                                                                                                                                                                                                        | 5                       |
| Trial design                                              | 8       | Description of trial design including type of trial (eg, parallel group, crossover, factorial, single group), allocation ratio, and framework (eg, superiority, equivalence, noninferiority, exploratory)                                                                                | 5                       |
| <b>Methods: Participants, interventions, and outcomes</b> |         |                                                                                                                                                                                                                                                                                          |                         |

|    |                      |     |                                                                                                                                                                                                                                                                                                                                                                                |                                     |
|----|----------------------|-----|--------------------------------------------------------------------------------------------------------------------------------------------------------------------------------------------------------------------------------------------------------------------------------------------------------------------------------------------------------------------------------|-------------------------------------|
| 1  |                      |     |                                                                                                                                                                                                                                                                                                                                                                                |                                     |
| 2  |                      |     |                                                                                                                                                                                                                                                                                                                                                                                |                                     |
| 3  |                      |     |                                                                                                                                                                                                                                                                                                                                                                                |                                     |
| 4  | Study setting        | 9   | Description of study settings (eg, community clinic, academic hospital) and list of countries where data will be collected. Reference to where list of study sites can be obtained                                                                                                                                                                                             | 5                                   |
| 5  |                      |     |                                                                                                                                                                                                                                                                                                                                                                                |                                     |
| 6  |                      |     |                                                                                                                                                                                                                                                                                                                                                                                |                                     |
| 7  | Eligibility criteria | 10  | Inclusion and exclusion criteria for participants. If applicable, eligibility criteria for study centres and individuals who will perform the interventions (eg, surgeons, psychotherapists)                                                                                                                                                                                   | 6-7                                 |
| 8  |                      |     |                                                                                                                                                                                                                                                                                                                                                                                |                                     |
| 9  |                      |     |                                                                                                                                                                                                                                                                                                                                                                                |                                     |
| 10 |                      |     |                                                                                                                                                                                                                                                                                                                                                                                |                                     |
| 11 | Interventions        | 11a | Interventions for each group with sufficient detail to allow replication, including how and when they will be administered                                                                                                                                                                                                                                                     | 8-13, Table 2, Supplementary File 1 |
| 12 |                      |     |                                                                                                                                                                                                                                                                                                                                                                                |                                     |
| 13 |                      |     |                                                                                                                                                                                                                                                                                                                                                                                |                                     |
| 14 |                      | 11b | Criteria for discontinuing or modifying allocated interventions for a given trial participant (eg, drug dose change in response to harms, participant request, or improving/worsening disease)                                                                                                                                                                                 | Table 2                             |
| 15 |                      |     |                                                                                                                                                                                                                                                                                                                                                                                |                                     |
| 16 |                      |     |                                                                                                                                                                                                                                                                                                                                                                                |                                     |
| 17 |                      |     |                                                                                                                                                                                                                                                                                                                                                                                |                                     |
| 18 |                      | 11c | Strategies to improve adherence to intervention protocols, and any procedures for monitoring adherence (eg, drug tablet return, laboratory tests)                                                                                                                                                                                                                              | 8-13, Table 2                       |
| 19 |                      |     |                                                                                                                                                                                                                                                                                                                                                                                |                                     |
| 20 |                      |     |                                                                                                                                                                                                                                                                                                                                                                                |                                     |
| 21 |                      | 11d | Relevant concomitant care and interventions that are permitted or prohibited during the trial                                                                                                                                                                                                                                                                                  | 13                                  |
| 22 |                      |     |                                                                                                                                                                                                                                                                                                                                                                                |                                     |
| 23 |                      |     |                                                                                                                                                                                                                                                                                                                                                                                |                                     |
| 24 | Outcomes             | 12  | Primary, secondary, and other outcomes, including the specific measurement variable (eg, systolic blood pressure), analysis metric (eg, change from baseline, final value, time to event), method of aggregation (eg, median, proportion), and time point for each outcome. Explanation of the clinical relevance of chosen efficacy and harm outcomes is strongly recommended | 13-18, Table 3                      |
| 25 |                      |     |                                                                                                                                                                                                                                                                                                                                                                                |                                     |
| 26 |                      |     |                                                                                                                                                                                                                                                                                                                                                                                |                                     |
| 27 |                      |     |                                                                                                                                                                                                                                                                                                                                                                                |                                     |
| 28 |                      |     |                                                                                                                                                                                                                                                                                                                                                                                |                                     |
| 29 |                      |     |                                                                                                                                                                                                                                                                                                                                                                                |                                     |
| 30 | Participant timeline | 13  | Time schedule of enrolment, interventions (including any run-ins and washouts), assessments, and visits for participants. A schematic diagram is highly recommended (see Figure)                                                                                                                                                                                               | Figure 1                            |
| 31 |                      |     |                                                                                                                                                                                                                                                                                                                                                                                |                                     |
| 32 |                      |     |                                                                                                                                                                                                                                                                                                                                                                                |                                     |
| 33 |                      |     |                                                                                                                                                                                                                                                                                                                                                                                |                                     |
| 34 | Sample size          | 14  | Estimated number of participants needed to achieve study objectives and how it was determined, including clinical and statistical assumptions supporting any sample size calculations                                                                                                                                                                                          | 19                                  |
| 35 |                      |     |                                                                                                                                                                                                                                                                                                                                                                                |                                     |
| 36 |                      |     |                                                                                                                                                                                                                                                                                                                                                                                |                                     |
| 37 |                      |     |                                                                                                                                                                                                                                                                                                                                                                                |                                     |
| 38 | Recruitment          | 15  | Strategies for achieving adequate participant enrolment to reach target sample size                                                                                                                                                                                                                                                                                            | 7                                   |
| 39 |                      |     |                                                                                                                                                                                                                                                                                                                                                                                |                                     |

#### Methods: Assignment of interventions (for controlled trials)

##### Allocation:

|    |                                  |     |                                                                                                                                                                                                                                                                                                                                                          |     |
|----|----------------------------------|-----|----------------------------------------------------------------------------------------------------------------------------------------------------------------------------------------------------------------------------------------------------------------------------------------------------------------------------------------------------------|-----|
| 43 |                                  |     |                                                                                                                                                                                                                                                                                                                                                          |     |
| 44 | Sequence generation              | 16a | Method of generating the allocation sequence (eg, computer-generated random numbers), and list of any factors for stratification. To reduce predictability of a random sequence, details of any planned restriction (eg, blocking) should be provided in a separate document that is unavailable to those who enrol participants or assign interventions | 7-8 |
| 45 |                                  |     |                                                                                                                                                                                                                                                                                                                                                          |     |
| 46 |                                  |     |                                                                                                                                                                                                                                                                                                                                                          |     |
| 47 |                                  |     |                                                                                                                                                                                                                                                                                                                                                          |     |
| 48 |                                  |     |                                                                                                                                                                                                                                                                                                                                                          |     |
| 49 |                                  |     |                                                                                                                                                                                                                                                                                                                                                          |     |
| 50 | Allocation concealment mechanism | 16b | Mechanism of implementing the allocation sequence (eg, central telephone; sequentially numbered, opaque, sealed envelopes), describing any steps to conceal the sequence until interventions are assigned                                                                                                                                                | 7-8 |
| 51 |                                  |     |                                                                                                                                                                                                                                                                                                                                                          |     |
| 52 |                                  |     |                                                                                                                                                                                                                                                                                                                                                          |     |
| 53 |                                  |     |                                                                                                                                                                                                                                                                                                                                                          |     |
| 54 |                                  |     |                                                                                                                                                                                                                                                                                                                                                          |     |
| 55 | Implementation                   | 16c | Who will generate the allocation sequence, who will enrol participants, and who will assign participants to interventions                                                                                                                                                                                                                                | 7-8 |
| 56 |                                  |     |                                                                                                                                                                                                                                                                                                                                                          |     |
| 57 | Blinding (masking)               | 17a | Who will be blinded after assignment to interventions (eg, trial participants, care providers, outcome assessors, data analysts), and how                                                                                                                                                                                                                | 7-8 |
| 58 |                                  |     |                                                                                                                                                                                                                                                                                                                                                          |     |
| 59 |                                  |     |                                                                                                                                                                                                                                                                                                                                                          |     |
| 60 |                                  |     |                                                                                                                                                                                                                                                                                                                                                          |     |

1  
2  
3  
4  
5  
6  
7  
8  
9  
10  
11  
12  
13  
14  
15  
16  
17  
18  
19  
20  
21  
22  
23  
24  
25  
26  
27  
28  
29  
30  
31  
32  
33  
34  
35  
36  
37  
38  
39  
40  
41  
42  
43  
44  
45  
46  
47  
48  
49  
50  
51  
52  
53  
54  
55  
56  
57  
58  
59  
60

|  |     |                                                                                                                                                      |    |
|--|-----|------------------------------------------------------------------------------------------------------------------------------------------------------|----|
|  | 17b | If blinded, circumstances under which unblinding is permissible, and procedure for revealing a participant's allocated intervention during the trial | NA |
|--|-----|------------------------------------------------------------------------------------------------------------------------------------------------------|----|

### Methods: Data collection, management, and analysis

|                         |     |                                                                                                                                                                                                                                                                                                                                                                                                              |    |
|-------------------------|-----|--------------------------------------------------------------------------------------------------------------------------------------------------------------------------------------------------------------------------------------------------------------------------------------------------------------------------------------------------------------------------------------------------------------|----|
| Data collection methods | 18a | Plans for assessment and collection of outcome, baseline, and other trial data, including any related processes to promote data quality (eg, duplicate measurements, training of assessors) and a description of study instruments (eg, questionnaires, laboratory tests) along with their reliability and validity, if known. Reference to where data collection forms can be found, if not in the protocol | 13 |
|-------------------------|-----|--------------------------------------------------------------------------------------------------------------------------------------------------------------------------------------------------------------------------------------------------------------------------------------------------------------------------------------------------------------------------------------------------------------|----|

|  |     |                                                                                                                                                                                           |    |
|--|-----|-------------------------------------------------------------------------------------------------------------------------------------------------------------------------------------------|----|
|  | 18b | Plans to promote participant retention and complete follow-up, including list of any outcome data to be collected for participants who discontinue or deviate from intervention protocols | 13 |
|--|-----|-------------------------------------------------------------------------------------------------------------------------------------------------------------------------------------------|----|

|                 |    |                                                                                                                                                                                                                                                                   |    |
|-----------------|----|-------------------------------------------------------------------------------------------------------------------------------------------------------------------------------------------------------------------------------------------------------------------|----|
| Data management | 19 | Plans for data entry, coding, security, and storage, including any related processes to promote data quality (eg, double data entry; range checks for data values). Reference to where details of data management procedures can be found, if not in the protocol | 18 |
|-----------------|----|-------------------------------------------------------------------------------------------------------------------------------------------------------------------------------------------------------------------------------------------------------------------|----|

|                     |     |                                                                                                                                                                          |    |
|---------------------|-----|--------------------------------------------------------------------------------------------------------------------------------------------------------------------------|----|
| Statistical methods | 20a | Statistical methods for analysing primary and secondary outcomes. Reference to where other details of the statistical analysis plan can be found, if not in the protocol | 19 |
|---------------------|-----|--------------------------------------------------------------------------------------------------------------------------------------------------------------------------|----|

|  |     |                                                                          |    |
|--|-----|--------------------------------------------------------------------------|----|
|  | 20b | Methods for any additional analyses (eg, subgroup and adjusted analyses) | 19 |
|--|-----|--------------------------------------------------------------------------|----|

|  |     |                                                                                                                                                                                 |    |
|--|-----|---------------------------------------------------------------------------------------------------------------------------------------------------------------------------------|----|
|  | 20c | Definition of analysis population relating to protocol non-adherence (eg, as randomised analysis), and any statistical methods to handle missing data (eg, multiple imputation) | 19 |
|--|-----|---------------------------------------------------------------------------------------------------------------------------------------------------------------------------------|----|

### Methods: Monitoring

|                 |     |                                                                                                                                                                                                                                                                                                                                       |    |
|-----------------|-----|---------------------------------------------------------------------------------------------------------------------------------------------------------------------------------------------------------------------------------------------------------------------------------------------------------------------------------------|----|
| Data monitoring | 21a | Composition of data monitoring committee (DMC); summary of its role and reporting structure; statement of whether it is independent from the sponsor and competing interests; and reference to where further details about its charter can be found, if not in the protocol. Alternatively, an explanation of why a DMC is not needed | 18 |
|-----------------|-----|---------------------------------------------------------------------------------------------------------------------------------------------------------------------------------------------------------------------------------------------------------------------------------------------------------------------------------------|----|

|  |     |                                                                                                                                                                         |       |
|--|-----|-------------------------------------------------------------------------------------------------------------------------------------------------------------------------|-------|
|  | 21b | Description of any interim analyses and stopping guidelines, including who will have access to these interim results and make the final decision to terminate the trial | 19-20 |
|--|-----|-------------------------------------------------------------------------------------------------------------------------------------------------------------------------|-------|

|       |    |                                                                                                                                                                                   |    |
|-------|----|-----------------------------------------------------------------------------------------------------------------------------------------------------------------------------------|----|
| Harms | 22 | Plans for collecting, assessing, reporting, and managing solicited and spontaneously reported adverse events and other unintended effects of trial interventions or trial conduct | 16 |
|-------|----|-----------------------------------------------------------------------------------------------------------------------------------------------------------------------------------|----|

|          |    |                                                                                                                                             |    |
|----------|----|---------------------------------------------------------------------------------------------------------------------------------------------|----|
| Auditing | 23 | Frequency and procedures for auditing trial conduct, if any, and whether the process will be independent from investigators and the sponsor | NA |
|----------|----|---------------------------------------------------------------------------------------------------------------------------------------------|----|

### Ethics and dissemination

|                          |    |                                                                                           |    |
|--------------------------|----|-------------------------------------------------------------------------------------------|----|
| Research ethics approval | 24 | Plans for seeking research ethics committee/institutional review board (REC/IRB) approval | 20 |
|--------------------------|----|-------------------------------------------------------------------------------------------|----|

|    |                               |     |                                                                                                                                                                                                                                                                                     |                      |
|----|-------------------------------|-----|-------------------------------------------------------------------------------------------------------------------------------------------------------------------------------------------------------------------------------------------------------------------------------------|----------------------|
| 1  |                               |     |                                                                                                                                                                                                                                                                                     |                      |
| 2  |                               |     |                                                                                                                                                                                                                                                                                     |                      |
| 3  |                               |     |                                                                                                                                                                                                                                                                                     |                      |
| 4  | Protocol amendments           | 25  | Plans for communicating important protocol modifications (eg, changes to eligibility criteria, outcomes, analyses) to relevant parties (eg, investigators, REC/IRBs, trial participants, trial registries, journals, regulators)                                                    | 20                   |
| 5  |                               |     |                                                                                                                                                                                                                                                                                     |                      |
| 6  |                               |     |                                                                                                                                                                                                                                                                                     |                      |
| 7  |                               |     |                                                                                                                                                                                                                                                                                     |                      |
| 8  | Consent or assent             | 26a | Who will obtain informed consent or assent from potential trial participants or authorised surrogates, and how (see Item 32)                                                                                                                                                        | 20                   |
| 9  |                               |     |                                                                                                                                                                                                                                                                                     |                      |
| 10 |                               |     |                                                                                                                                                                                                                                                                                     |                      |
| 11 |                               | 26b | Additional consent provisions for collection and use of participant data and biological specimens in ancillary studies, if applicable                                                                                                                                               | NA                   |
| 12 |                               |     |                                                                                                                                                                                                                                                                                     |                      |
| 13 |                               |     |                                                                                                                                                                                                                                                                                     |                      |
| 14 | Confidentiality               | 27  | How personal information about potential and enrolled participants will be collected, shared, and maintained in order to protect confidentiality before, during, and after the trial                                                                                                | 18                   |
| 15 |                               |     |                                                                                                                                                                                                                                                                                     |                      |
| 16 |                               |     |                                                                                                                                                                                                                                                                                     |                      |
| 17 |                               |     |                                                                                                                                                                                                                                                                                     |                      |
| 18 | Declaration of interests      | 28  | Financial and other competing interests for principal investigators for the overall trial and each study site                                                                                                                                                                       | 21                   |
| 19 |                               |     |                                                                                                                                                                                                                                                                                     |                      |
| 20 | Access to data                | 29  | Statement of who will have access to the final trial dataset, and disclosure of contractual agreements that limit such access for investigators                                                                                                                                     | Supplementary File 1 |
| 21 |                               |     |                                                                                                                                                                                                                                                                                     |                      |
| 22 |                               |     |                                                                                                                                                                                                                                                                                     |                      |
| 23 |                               |     |                                                                                                                                                                                                                                                                                     |                      |
| 24 | Ancillary and post-trial care | 30  | Provisions, if any, for ancillary and post-trial care, and for compensation to those who suffer harm from trial participation                                                                                                                                                       | NA                   |
| 25 |                               |     |                                                                                                                                                                                                                                                                                     |                      |
| 26 | Dissemination policy          | 31a | Plans for investigators and sponsor to communicate trial results to participants, healthcare professionals, the public, and other relevant groups (eg, via publication, reporting in results databases, or other data sharing arrangements), including any publication restrictions | 20                   |
| 27 |                               |     |                                                                                                                                                                                                                                                                                     |                      |
| 28 |                               | 31b | Authorship eligibility guidelines and any intended use of professional writers                                                                                                                                                                                                      | NA                   |
| 29 |                               |     |                                                                                                                                                                                                                                                                                     |                      |
| 30 |                               | 31c | Plans, if any, for granting public access to the full protocol, participant-level dataset, and statistical code                                                                                                                                                                     | NA                   |
| 31 |                               |     |                                                                                                                                                                                                                                                                                     |                      |
| 32 |                               |     |                                                                                                                                                                                                                                                                                     |                      |
| 33 |                               |     |                                                                                                                                                                                                                                                                                     |                      |
| 34 |                               |     |                                                                                                                                                                                                                                                                                     |                      |
| 35 |                               |     |                                                                                                                                                                                                                                                                                     |                      |
| 36 |                               |     |                                                                                                                                                                                                                                                                                     |                      |
| 37 |                               |     |                                                                                                                                                                                                                                                                                     |                      |
| 38 | <b>Appendices</b>             |     |                                                                                                                                                                                                                                                                                     |                      |
| 39 | Informed consent materials    | 32  | Model consent form and other related documentation given to participants and authorised surrogates                                                                                                                                                                                  | Supplementary File 1 |
| 40 |                               |     |                                                                                                                                                                                                                                                                                     |                      |
| 41 |                               |     |                                                                                                                                                                                                                                                                                     |                      |
| 42 |                               |     |                                                                                                                                                                                                                                                                                     |                      |
| 43 | Biological specimens          | 33  | Plans for collection, laboratory evaluation, and storage of biological specimens for genetic or molecular analysis in the current trial and for future use in ancillary studies, if applicable                                                                                      | Supplementary File 2 |
| 44 |                               |     |                                                                                                                                                                                                                                                                                     |                      |
| 45 |                               |     |                                                                                                                                                                                                                                                                                     |                      |

\*It is strongly recommended that this checklist be read in conjunction with the SPIRIT 2013 Explanation & Elaboration for important clarification on the items. Amendments to the protocol should be tracked and dated. The SPIRIT checklist is copyrighted by the SPIRIT Group under the Creative Commons "[Attribution-Non Commercial-No Derivs 3.0 Unported](https://creativecommons.org/licenses/by-nc-nd/3.0/)" license.

# BMJ Open

## The effectiveness of an anti-inflammatory diet versus low-fat diet for knee osteoarthritis: the FEAST randomised controlled trial protocol

|                                 |                                                                                                                                                                                                                                                                                                                                                                                                                                                                                                                                                                                                                                                                                                                                                                                                                                                                                                                                                                                                                                                                                                                                         |
|---------------------------------|-----------------------------------------------------------------------------------------------------------------------------------------------------------------------------------------------------------------------------------------------------------------------------------------------------------------------------------------------------------------------------------------------------------------------------------------------------------------------------------------------------------------------------------------------------------------------------------------------------------------------------------------------------------------------------------------------------------------------------------------------------------------------------------------------------------------------------------------------------------------------------------------------------------------------------------------------------------------------------------------------------------------------------------------------------------------------------------------------------------------------------------------|
| Journal:                        | <i>BMJ Open</i>                                                                                                                                                                                                                                                                                                                                                                                                                                                                                                                                                                                                                                                                                                                                                                                                                                                                                                                                                                                                                                                                                                                         |
| Manuscript ID                   | bmjopen-2023-079374.R1                                                                                                                                                                                                                                                                                                                                                                                                                                                                                                                                                                                                                                                                                                                                                                                                                                                                                                                                                                                                                                                                                                                  |
| Article Type:                   | Protocol                                                                                                                                                                                                                                                                                                                                                                                                                                                                                                                                                                                                                                                                                                                                                                                                                                                                                                                                                                                                                                                                                                                                |
| Date Submitted by the Author:   | 22-Jan-2024                                                                                                                                                                                                                                                                                                                                                                                                                                                                                                                                                                                                                                                                                                                                                                                                                                                                                                                                                                                                                                                                                                                             |
| Complete List of Authors:       | Law, Lynette; La Trobe University, La Trobe Sport and Exercise Medicine Research Centre<br>Heerey, Joshua; La Trobe University, La Trobe Sport and Exercise Medicine Research Centre<br>Devlin, Brooke; University of Queensland, School of Human Movement and Nutrition Sciences<br>Brukner, Peter; La Trobe University, La Trobe Sport and Exercise Medicine Research Centre<br>Kemp, Joanne; La Trobe University, La Trobe Sport and Exercise Medicine Research Centre<br>Attanayake, Amanda; La Trobe University, La Trobe Sport and Exercise Medicine Research Centre<br>Hulett, Mark; La Trobe University, Department of Biochemistry and Chemistry, La Trobe Institute for Molecular Science<br>De Livera, Alysha; La Trobe University, Department of Mathematics and Statistics; The University of Melbourne, School of Population and Global Health<br>Mosler, Andrea; La Trobe University, La Trobe Sport and Exercise Medicine Research Centre<br>Morris, Hayden; Melbourne Knee Centre<br>White, Nathan; Melbourne Knee Centre<br>Culvenor, Adam; La Trobe University, La Trobe Sport and Exercise Medicine Research Centre |
| <b>Primary Subject Heading</b>: | Rheumatology                                                                                                                                                                                                                                                                                                                                                                                                                                                                                                                                                                                                                                                                                                                                                                                                                                                                                                                                                                                                                                                                                                                            |
| Secondary Subject Heading:      | Rehabilitation medicine                                                                                                                                                                                                                                                                                                                                                                                                                                                                                                                                                                                                                                                                                                                                                                                                                                                                                                                                                                                                                                                                                                                 |
| Keywords:                       | Knee < ORTHOPAEDIC & TRAUMA SURGERY, Chronic Disease, REHABILITATION MEDICINE, NUTRITION & DIETETICS                                                                                                                                                                                                                                                                                                                                                                                                                                                                                                                                                                                                                                                                                                                                                                                                                                                                                                                                                                                                                                    |
|                                 |                                                                                                                                                                                                                                                                                                                                                                                                                                                                                                                                                                                                                                                                                                                                                                                                                                                                                                                                                                                                                                                                                                                                         |

SCHOLARONE™  
Manuscripts



1  
2  
3  
4 1 **The effectiveness of an anti-inflammatory diet versus low-**  
5  
6 2 **fat diet for knee osteoarthritis: the FEAST randomised**  
7  
8  
9 3 **controlled trial protocol**  
10  
11 4

13 5 Lynette Law<sup>1</sup>, Joshua J Heerey<sup>1</sup>, Brooke L Devlin<sup>2</sup>, Peter Brukner<sup>1</sup>, Joanne L Kemp<sup>1</sup>, Amanda  
14 6 Attanayake<sup>1</sup>, Mark D Hulett<sup>3</sup>, Alysha De Livera<sup>4, 5, 6</sup>, Andrea B Mosler<sup>1</sup>, Hayden G Morris<sup>7</sup>,  
15 7 Nathan P White<sup>7</sup>, Adam G Culvenor<sup>1</sup>  
16  
17  
18  
19 8

- 20 9  
21 1. La Trobe Sport and Exercise Medicine Research Centre, School of Allied Health,  
22 10 Human Services and Sport, La Trobe University, Bundoora, Victoria, Australia  
23  
24 11 2. School of Human Movement and Nutrition Sciences, University of Queensland,  
25 12 Brisbane, Australia  
26  
27 12 3. Department of Biochemistry and Chemistry, La Trobe Institute for Molecular Science,  
28 13 La Trobe University, Bundoora, Victoria, Australia  
29 14  
30 14 4. Department of Mathematics and Statistics, La Trobe University, Bundoora, Victoria,  
31 15 Australia  
32 16  
33 16 5. School of Population and Global Health, The University of Melbourne, Victoria,  
34 17 Australia  
35 18  
36 18 6. Baker Heart and Diabetes Research Institute, Melbourne, Victoria, Australia  
37 19  
38 19 7. Melbourne Knee Centre, Melbourne, Victoria, Australia.  
39 20  
40  
41  
42  
43  
44  
45  
46  
47  
48  
49  
50  
51  
52  
53  
54  
55  
56  
57  
58  
59  
60

22 **Corresponding Author:**

23 Dr Adam Culvenor  
24 La Trobe Sport and Exercise Medicine Research Centre,  
25 La Trobe University,  
26 Kingsbury Drive, Bundoora, 3086, Victoria, Australia  
27 Phone: +61 9479 5116  
28 Email: a.culvenor@latrobe.edu.au

29 **Word count:** 3,998

1  
2  
3  
4 30 **ABSTRACT**

5  
6 31 **Introduction:** Chronic inflammation plays a key role in knee osteoarthritis pathophysiology  
7  
8 32 and increases risk of comorbidities, yet most interventions do not typically target  
9  
10 33 inflammation. Our study will investigate if an anti-inflammatory dietary program is superior  
11  
12 34 to a standard care low-fat dietary program for improving knee pain, function and quality-of-  
13  
14 35 life in people with knee osteoarthritis.

15 36 **Methods and analysis:** The FEAST (eFEct of an Anti-inflammatory diet for knee oSTeoarthritis)  
16  
17 37 Study is a parallel-group, assessor-blinded, superiority randomised controlled trial. Following  
18  
19 38 baseline assessment, 144 participants aged 45-85 years with symptomatic knee osteoarthritis  
20  
21 39 will be randomly allocated to one of two treatment groups (1:1 ratio). Participants  
22  
23 40 randomised to the anti-inflammatory dietary program will receive six dietary consultations  
24  
25 41 over 12 weeks (2 in-person, 4 phone/videoconference) and additional educational and  
26  
27 42 behaviour change resources. The consultations and resources emphasise nutrient-dense  
28  
29 43 minimally processed anti-inflammatory foods and discourage pro-inflammatory processed  
30  
31 44 foods. Participants randomised to the standard care low-fat dietary program will receive  
32  
33 45 three dietary consultations over 12 weeks (2 in-person, 1 phone/videoconference) consisting  
34  
35 46 of healthy eating advice and education based on the Australian Dietary Guidelines, reflecting  
36  
37 47 usual care in Australia. Adherence will be assessed with 3-day food diaries. Outcomes are  
38  
39 48 assessed at 12 weeks and 6 months. The primary outcome will be change from baseline to 12  
40  
41 49 weeks in the mean score on four Knee injury and Osteoarthritis Outcome Score (KOOS<sub>4</sub>)  
42  
43 50 subscales: knee pain, symptoms, function in daily activities and knee-related quality-of-life.  
44  
45 51 Secondary outcomes include change in individual KOOS subscale scores, patient-perceived  
46  
47 52 improvement, health-related quality-of-life, body mass and composition using dual-energy X-  
48  
49 53 ray absorptiometry, inflammatory (high-sensitivity C-Reactive Protein, Interleukins, Tumour  
50  
51 54 Necrosis Factor- $\alpha$ ) and metabolic blood biomarkers (glucose, HbA1c, insulin, liver function,  
52  
53 55 lipids), lower-limb function and physical activity.

54  
55 56 **Ethics and Dissemination:** Approved by La Trobe University Human Ethics Committee. Results  
56  
57 57 will be presented in peer-reviewed journals and at international conferences.

58 58 **Trial registration:** ACTRN12622000440729  
59  
60

1  
2  
3 59 **Keywords:** Inflammation, Low-carbohydrate, Anti-inflammatory, Pain, Osteoarthritis, Knee,  
4  
5 60 Chronic disease, Rehabilitation, Diet  
6  
7

8 61  
9

10  
11 62 **STRENGTHS AND LIMITATIONS OF THIS STUDY**  
12

- 13  
14 63 • The anti-inflammatory dietary program was codeveloped and piloted with patients and  
15 64 clinicians, with the comparison low-fat dietary program representing usual care.  
16  
17  
18 65 • Sufficiently powered trial evaluating change from baseline to 12 weeks (primary endpoint)  
19 66 and 6 months facilitating longer-term effectiveness evaluation of the anti-inflammatory  
20 67 dietary program.  
21  
22  
23  
24 68 • This trial will evaluate both self-reported and objective outcomes to understand potential  
25 69 mechanisms of symptomatic changes.  
26  
27  
28  
29 70 • While outcome assessors are blinded to group allocation, the health professionals  
30 71 delivering the interventions and participants are unable to be blinded to group allocation  
31 72 due to the type of interventions.  
32  
33  
34  
35  
36  
37  
38  
39  
40  
41  
42  
43  
44  
45  
46  
47  
48  
49  
50  
51  
52  
53  
54  
55  
56  
57  
58  
59  
60

## 73 INTRODUCTION

74 Osteoarthritis (OA) is the most common rheumatic disease affecting approximately 15% of  
75 the population, with OA of the knee being most prevalent.(1, 2) Knee OA and its associated  
76 symptoms can be disabling and lead to substantial societal and healthcare costs.(3) In  
77 Australia alone, annual OA-related healthcare expenditure exceeds \$2.1 billion.(4) Although  
78 the main symptom of knee OA is pain, individuals with knee OA have an increased risk of  
79 other chronic diseases, including cardiovascular disease and diabetes.(5) As many as two-  
80 thirds of older adults with knee OA have more than one comorbidity.(6)

81  
82 Clinical guidelines for knee OA recommend exercise-therapy and weight-loss as first-line  
83 management strategies due to their excellent safety profile and therapeutic effects similar to  
84 commonly used analgesics.(3, 7) However, the effectiveness of exercise-therapy has recently  
85 been questioned due to its lack of benefit over an open-label placebo,(8) and findings that  
86 one-third of people completing an exercise program do not achieve a clinically meaningful  
87 improvement in pain.(9, 10) Weight-loss programs in those who are overweight or obese  
88 typically consist of caloric restrictive diets, which are challenging to adhere to and sustain.(11)  
89 A meta-analysis highlighted that, within two years of a calorie-restrictive program, over half  
90 of initial weight lost was regained, and by 5 years, this figure jumped to >80%.(12)

91  
92 Anti-inflammatory diets provide an alternative to calorie-restrictive approaches by targeting  
93 local and systemic inflammation, both contributors to OA disease onset, progression and  
94 symptom burden.(13-15) Anti-inflammatory diets are typically high in minimally processed,  
95 nutrient rich foods such as fruit, vegetables, spices and extra virgin olive oil, which are dense  
96 in nutrients such as polyphenols, carotenoids, fibre, monounsaturated and polyunsaturated  
97 fatty acids.(16-19) These nutrients can significantly reduce inflammation even in the absence  
98 of weight loss(20) via antioxidant and anti-inflammatory properties by neutralising free  
99 radicals and associated cell damage, as well as improved lipid profiles.(16, 17, 21) Omega-3  
100 fatty acids, abundant in nuts, seeds and fish, are also a key part of anti-inflammatory dietary  
101 approaches and help to achieve a more desirable omega-6 to omega-3 ratio.(22) In contrast,  
102 omega-6 fatty acids can be converted into arachidonic acid, a precursor for proinflammatory  
103 eicosanoids.(23) An elevated omega-6:omega-3 ratio exacerbates oxidative stress, which

1  
2  
3 104 increases the risk and severity of chronic disease, including OA.(15) Due to their focus on real  
4  
5 105 foods and consumption to satiety, anti-inflammatory diets are likely more sustainable than  
6  
7 106 traditional calorie-restrictive approaches.(17)  
8  
9 107

10  
11 108 Anti-inflammatory diets have garnered much interest in recent years due to their  
12  
13 109 effectiveness in alleviating symptoms and improving biomarkers for a variety of chronic  
14  
15 110 diseases, including diabetes,(18) cardiovascular disease,(24) epilepsy(25) and rheumatoid  
16  
17 111 arthritis.(26) Small studies investigating anti-inflammatory diets for knee OA have  
18  
19 112 demonstrated feasibility and effectiveness in reducing symptoms and inflammation over 12-  
20  
21 113 16 weeks.(15, 27, 28) To date, no fully powered randomised controlled trial (RCT) has  
22  
23 114 evaluated the effectiveness of an anti-inflammatory diet in knee OA.  
24

25 115  
26 116 The primary aim of this RCT is to estimate the average effect of an anti-inflammatory dietary  
27  
28 117 program compared to a standard care low-fat dietary program on knee-related pain, function  
29  
30 118 and quality of life in individuals with knee OA. We hypothesise that the anti-inflammatory  
31  
32 119 dietary program will result in greater improvements in knee-related pain, function and quality  
33  
34 120 of life after 12 weeks (primary endpoint) and 6 months (secondary endpoint) compared to  
35  
36 121 the standard care low-fat dietary program. Secondary aims are to assess 12-week and 6-  
37  
38 122 month effectiveness of the anti-inflammatory dietary program on: i) self-reported global  
39  
40 123 rating of change and achievement of acceptable symptoms; ii) health-related quality of life;  
41  
42 124 iii) body mass and composition using dual-energy X-ray absorptiometry (DXA); iv)  
43  
44 125 inflammatory and metabolic blood biomarkers, global lower-limb function and physical  
45  
46 126 activity.  
47

## 48 128 **METHODS AND ANALYSIS**

### 49 129 **Study Design**

50  
51  
52 130 This protocol describes a pragmatic, 2-arm, parallel-group assessor-blinded superiority RCT  
53  
54 131 and will be reported according to the Standard Protocol Items: Recommendations for  
55  
56 132 Interventional Trials (SPIRIT) statement.(29) Reporting of the completed RCT will conform to  
57  
58 133 the Consolidated Standards of Reporting Trials (CONSORT) statement.(30) The FEAST trial will  
59  
60 134 be conducted at a single site (La Trobe University) in Melbourne, Australia with the first

1  
2  
3 135 participant randomised on August 31, 2022 and the final participant anticipated to be  
4  
5 136 randomised in June 2024. The primary endpoint will be at 12 weeks, with additional follow-  
6  
7 137 up at 6 months (further longer-term follow-up dependent on funding). The study was  
8  
9 138 prospectively registered on the Australian and New Zealand Clinical Trial Registry (ACTRN  
10  
11 139 12622000440729).

12  
13 140

#### 14 141 **Patient and public involvement**

16 142 Participants and clinicians co-designed the anti-inflammatory intervention, research  
17  
18 143 questions and study methods. This input was gained from: i) qualitative interviews with  
19  
20 144 participants from the pilot study as part of formal process evaluation strategies;(28) ii)  
21  
22 145 participant and clinician focus groups providing feedback on study recruitment material and  
23  
24 146 participant handbooks; and iii) discussion with experienced clinicians managing knee OA and  
25  
26 147 dietary intervention strategies as part of FEAST development. Patients and clinicians will  
27  
28 148 provide input into the dissemination of study results by assisting with the decision on what  
29  
30 149 information to share and in what format.

31 150

#### 33 151 **Participants**

35 152 One hundred and forty adults 45-85 years old with chronic knee pain consistent with a clinical  
36  
37 153 OA diagnosis using criteria from the National Institute for Health and Care Excellence, which  
38  
39 154 does not require radiographic evidence,(31) will be enrolled (table 1).

40 155

42 156 **Table 1.** Eligibility criteria

| Inclusion criteria                                                                                                                                                                                                                                                                                                                                                     | Exclusion criteria                                     |
|------------------------------------------------------------------------------------------------------------------------------------------------------------------------------------------------------------------------------------------------------------------------------------------------------------------------------------------------------------------------|--------------------------------------------------------|
| Fulfil National Institute for Health and Care Excellence(31) clinical criteria for osteoarthritis:                                                                                                                                                                                                                                                                     | Knee injection, injury or surgery in the past 3 months |
| <ul style="list-style-type: none"> <li>• Activity-related joint pain with average knee pain severity <math>\geq 4</math> on 11-point numeric rating scale (NRS, where 0 = no pain, 10 = worst pain possible) in the past week;</li> <li>• No morning stiffness or morning stiffness <math>\leq 30</math> min; and</li> <li>• Age <math>\geq 45</math> years</li> </ul> |                                                        |

|                                                                                                                                    |                                                                                                                                                                               |
|------------------------------------------------------------------------------------------------------------------------------------|-------------------------------------------------------------------------------------------------------------------------------------------------------------------------------|
| Age $\leq$ 85 years – due to potential safety reasons and additional co-morbidities that may hinder capacity for dietary adherence | Had all eligible knee joints replaced by arthroplasty                                                                                                                         |
| History of knee pain on most days of the past month                                                                                | Planning to have knee surgery in next six months                                                                                                                              |
| History of knee pain for at least 3 months                                                                                         | Already strictly following an anti-inflammatory diet (e.g., low carbohydrate, high-fat, paleo, Mediterranean) or strict exclusion diet (e.g., vegan)                          |
| Be willing and able to attend 3-4 phone consults and 12-week and 6-month follow-up assessments                                     | Unable to follow anti-inflammatory diet (e.g., medically contraindicated, history of food allergy/hypersensitivity, family reasons)                                           |
| Able to understand written and spoken English, and to give informed consent                                                        | Taking the following diabetic medication that affects blood sugar levels (i.e., insulin, SGLT 2 inhibitors, sulfonylureas) to mitigate the risk of hypoglycaemia/ketoacidosis |
|                                                                                                                                    | Contraindications for DXA scans (e.g., pregnant, breastfeeding, planning pregnancy in next 6 months, >200kg body weight)                                                      |
|                                                                                                                                    | >5kg weight fluctuation in past 3 months (i.e., unstable weight)                                                                                                              |
|                                                                                                                                    | Dietary intervention (by a qualified dietitian) in past 3 months                                                                                                              |
|                                                                                                                                    | A diagnosed psychiatric disorder (excluding anxiety and depression), eating disorder or past bariatric surgery                                                                |

157 NRS, numeric rating scale; SGLT, sodium glucose co-transporter; DXA, dual-energy X-ray

158 absorptiometry

159

## 160 **Recruitment and screening procedure**

161 Trial flow is outlined in figure 1. Participants will be recruited from our network of  
 162 collaborating orthopaedic surgeons in Victoria, Australia. Consistent with our prior work in  
 163 other musculoskeletal conditions,(32, 33) potentially eligible participants (i.e., individuals  
 164 aged 45-85 years with a history of knee pain for which medical care was sought) will be sent  
 165 a study information letter inviting them to contact the research team. Additional recruitment  
 166 strategies will include advertisements in local newspapers, community/university  
 167 magazines/posters, community market stalls and social media.



1  
2  
3 168  
45 169 **\*\*\*FIGURE ONE HERE\*\*\***  
6

7 170

8 171 Potential participants will be screened for eligibility via telephone. Once eligibility is  
9 172 confirmed, participants will attend a study orientation session via videoconference to explain  
10 173 further study details (e.g., fasting requirements) and be orientated to the dietary assessment  
11 174 tool (3-day food diary). If both knees meet the inclusion criteria, the most symptomatic knee  
12 175 will be considered as the index knee.  
13  
14  
15  
16  
17

18 176

19  
20 177 *Randomisation procedure, concealment of allocation and blinding*

21  
22 178 Upon completion of baseline assessment, participants will be randomised to either the anti-  
23 179 inflammatory dietary program or standard care low-fat dietary program. Study treatments,  
24 180 but not study hypotheses, will be revealed to participants. A computer-generated  
25 181 randomisation schedule has been developed *a priori* by an independent statistician in random  
26 182 permuted blocks of 4-8 and stratified by sex and body mass index ( $\geq 30\text{kg.m}^{-2}$  vs  $<30\text{kg.m}^{-2}$ ).  
27 183 To ensure concealed allocation, the randomisation schedule will be stored electronically in  
28 184 the secure Research Electronic Data Capture (REDCap®) system and only accessible to an  
29 185 unblinded researcher once baseline measures have been obtained, who will communicate  
30 186 treatment allocation to the participant. Investigators conducting the follow-up assessments  
31 187 will be blinded to group allocation. As the primary outcome is self-reported, participants are  
32 188 considered assessors; therefore, they will be blinded to previous scores. The health  
33 189 professionals delivering the interventions will deliver the intervention for both groups.  
34 190 Specific protocols for both interventions (including consultation contents and format, and  
35 191 accompanying resources) have been developed, and the health professionals have received  
36 192 training to ensure equal credibility. Random observations of intervention delivery will be  
37 193 conducted by the principal investigators to ensure treatment delivery credibility and fidelity.  
38 194 An independent statistician, blinded to group allocation, will perform the primary RCT  
39 195 analysis.  
40  
41  
42  
43  
44  
45  
46  
47  
48  
49  
50  
51  
52  
53  
54

55 196  
56  
57  
58  
59  
60

## 197 **Interventions**

198 The anti-inflammatory dietary program and standard care low-fat dietary program are  
199 summarised aligning to Template for Intervention Description and Replication (TIDieR)  
200 guidelines(34) (table 2). Participants in both intervention groups were not actively  
201 discouraged to lose weight, but weight loss was described as a potential outcome of the  
202 interventions. The same health professionals will deliver the intervention for both groups.

### 204 *Anti-inflammatory dietary program*

205 Participants allocated to the anti-inflammatory dietary program will receive specific anti-  
206 inflammatory dietary education and an individualised eating plan, as well as a suite of  
207 resources to support behaviour change. The anti-inflammatory dietary program will be  
208 delivered over 12 weeks by a qualified dietitian or by another health professional specially  
209 trained to deliver the intervention (e.g., physiotherapist).

210  
211 Participants will be encouraged to follow a diet containing minimally-processed foods and  
212 vegetable oils, and higher amounts of healthy fats and nutrient-dense wholefoods known to  
213 fight inflammation (e.g., fresh fruits low in natural sugar such as berries, non-starchy  
214 vegetables, nuts and seeds, seafood, poultry, red meat, eggs, full-fat dairy). Healthy fats  
215 include monounsaturated and polyunsaturated fats with optimal omega-3: omega-6 ratios as  
216 found in seafood, nuts, and extra-virgin olive oil. Participants will be advised to limit processed  
217 foods, refined carbohydrates (e.g., pasta, bread, rice), confectionary and foods with added  
218 sugar. Participants will be encouraged to consume a normocaloric diet and to eat to satiety,  
219 with no specific percentage of total energy intake targets for carbohydrate, fat or protein.

220  
221 An initial in-person consultation (~45 minutes) will occur immediately following group  
222 allocation to constructively review participant's current dietary intake (using baseline 3-day  
223 food diary) and develop an individualised meal plan. Participants will be provided with a  
224 comprehensive explanation of anti-inflammatory dietary principles, its rationale (e.g., the role  
225 of inflammation in OA, link between foods and inflammation) and its potential benefits and  
226 side-effects, and address questions and/or concerns. The following educational and  
227 behaviour change resources will also be provided at the initial consultation to support

1  
2  
3 228 adherence: i) bespoke information booklet providing anti-inflammatory eating information,  
4 229 example meal plans, and foods that are encouraged and foods to avoid (Supplementary file 1  
5 230 and 2); ii) complimentary subscription to an anti-inflammatory program (Defeat Diabetes  
6 231 phone app/website), providing anti-inflammatory recipes, masterclasses, meal plans and  
7 232 educational articles; iii) complimentary links to recommended documentaries exploring the  
8 233 benefits of anti-inflammatory nutrition (i.e., Fat Fiction, Cereal Killers, That Sugar Film); and  
9 234 iv) complimentary copy of a book exploring benefits of anti-inflammatory approach (A Fat Lot  
10 235 of Good(35)).  
11  
12  
13  
14  
15  
16  
17  
18  
19

20 237 Follow-up phone/videoconference consultations (~30 minutes) will be scheduled in weeks 2,  
21 238 4, 6, and 9, with timing to be negotiated between each participant and the health professional  
22 239 delivering the intervention. A final in-person consultation will be delivered immediately  
23 240 following the completion of the 12-week assessment. These follow-up consultations will  
24 241 provide participants with ongoing support, education and accountability. A 3-day food diary,  
25 242 completed prior to each consultation (see outcomes/adherence section), will guide  
26 243 individualised feedback and support to adapt meal plans to optimise adherence.  
27  
28  
29  
30  
31  
32  
33  
34  
35  
36  
37  
38  
39  
40  
41  
42  
43  
44  
45  
46  
47  
48  
49  
50  
51  
52  
53  
54  
55  
56  
57  
58  
59  
60

244 **Table 2:** Overview of intervention delivery described according to the TIDieR guidelines

| 1. BRIEF NAME        | Anti-inflammatory dietary program                                                                                                                                                                                                                                                                                                                                                                                                              | Standard care low-fat dietary program                                                                                                                                                                                                                                                  |
|----------------------|------------------------------------------------------------------------------------------------------------------------------------------------------------------------------------------------------------------------------------------------------------------------------------------------------------------------------------------------------------------------------------------------------------------------------------------------|----------------------------------------------------------------------------------------------------------------------------------------------------------------------------------------------------------------------------------------------------------------------------------------|
| 2. WHY               | Anti-inflammatory diets targeting systemic inflammation assist in the prevention and management of various chronic diseases.(16)<br>Small pilot studies have shown a positive effect of anti-inflammatory diets to improve knee-related symptoms in people with knee osteoarthritis.(28)                                                                                                                                                       | Healthy eating guidelines and dietary advice described in the standard care program booklet was based on Australian Dietary Guidelines (ADGs).(36, 37)<br><br>Two-three dietetic consultations represent usual care for patients referred for dietary management in Australia.(37, 38) |
| 3. WHAT (MATERIALS)  | Participants receive an intervention handbook containing all study details, key anti-inflammatory eating principles, example meal plans, traffic light system of foods encouraged and discouraged, and education (e.g., common myths, tips for eating out, shopping tips); complimentary access to the Defeat Diabetes program app/website; complimentary links to three movies; and a complimentary copy of the book “A Fat Lot of Good”.(35) | Participants receive an educational handbook emphasising ADGs healthy eating principles and are provided links to the online resources from the Eat for Health website ( <a href="https://www.eatforhealth.gov.au/">https://www.eatforhealth.gov.au/</a> ).                            |
| 4. WHAT (PROCEDURES) | Six consultations providing individualised guidance and support to follow an anti-inflammatory eating pattern, emphasising the consumption of fruits, non-starchy vegetables, fish, poultry, red meat, eggs, full-fat dairy, nuts, seeds, and extra virgin olive oil. Participants will be encouraged to avoid highly processed foods, refined carbohydrates, added sugar, and processed meats.                                                | Three consultations providing general advice and education regarding healthy eating based on the ADGs. The principles focus on consumption of foods from the five food groups, while limiting intake of foods containing saturated fat, added salt, added sugars and alcohol.          |
| 5. WHO PROVIDED      | A qualified dietitian or health professional specially trained to deliver all components.                                                                                                                                                                                                                                                                                                                                                      | A qualified dietitian or health professional specially trained to deliver all components.                                                                                                                                                                                              |
| 6. HOW               | Delivered with individual support for 12 weeks, after which, participants will be encouraged to sustain the anti-inflammatory diet unsupported up to 6 months. Consultations are one-to-one.                                                                                                                                                                                                                                                   | Delivered with standard healthy eating advice for 12 weeks, after which, participants will be encouraged to sustain the program unsupported up to 6 months. Consultations are one-to-one.                                                                                              |
| 7. WHERE             | In-person consultations will occur at La Trobe University Nutrition and Dietetics research laboratory. Additional                                                                                                                                                                                                                                                                                                                              | In-person consultations will occur at the La Trobe University Nutrition and Dietetics research                                                                                                                                                                                         |

|                               |                                                                                                                                                                                                                                                                                                                                                                                                     |                                                                                                                                                                                                                                                                                                                                                                                                   |
|-------------------------------|-----------------------------------------------------------------------------------------------------------------------------------------------------------------------------------------------------------------------------------------------------------------------------------------------------------------------------------------------------------------------------------------------------|---------------------------------------------------------------------------------------------------------------------------------------------------------------------------------------------------------------------------------------------------------------------------------------------------------------------------------------------------------------------------------------------------|
|                               | consultations will occur via telephone/videoconference (e.g., Zoom). Participants will integrate the diet principles into their daily consumption of foods and beverages.                                                                                                                                                                                                                           | laboratory. Additional consultations will occur via telephone/videoconference (e.g., Zoom). Participants will integrate the diet principles into their daily consumption of foods and beverages.                                                                                                                                                                                                  |
| <b>8. WHEN AND HOW MUCH</b>   | <p>Two in-person consultations at baseline (~45 mins) and week 12 (~30 mins)</p> <p>Four phone/videoconference follow-up consultations (~30 mins) in week 2, 4, 6, and 9.</p> <p><b>Total active intervention delivery time:</b> ~3.5 hours</p> <p>Participants are provided with self-management resources to optimise adherence to the anti-inflammatory diet up to the 6-month follow-up.</p>    | <p>Two in-person consultations at baseline (~45 mins) and week 12 (~30 mins)</p> <p>One phone/videoconference follow-up consultation (30 mins) in week 6.</p> <p><b>Total active control delivery time:</b> ~1.5 hours</p> <p>Participants encouraged to sustain their diet up to 6-month follow-up.</p>                                                                                          |
| <b>9. TAILORING</b>           | Individualised anti-inflammatory dietary advice, education, and support aligning with participant preferences and goals.                                                                                                                                                                                                                                                                            | Advice based on the ADGs.                                                                                                                                                                                                                                                                                                                                                                         |
| <b>10. MODIFICATIONS</b>      | Any modifications will be reported.                                                                                                                                                                                                                                                                                                                                                                 |                                                                                                                                                                                                                                                                                                                                                                                                   |
| <b>11. HOW WELL (planned)</b> | Two-three professionals (qualified dietitian and other health professional) receive prior training in how to deliver and supervise the program. Fidelity is assessed through random auditing by members of the principal investigator team (AC or BD). Participant adherence to the anti-inflammatory diet is assessed through consultation attendance, regular 3-day food diaries and self-report. | Two-three professionals (qualified dietitian and health professional) receive prior training in how to deliver and supervise the program. Fidelity is assessed through random auditing by members of the principal investigator team (AC or BD). Participant adherence to the standard care low-fat diet is assessed through consultation attendance, regular 3-day food diaries and self-report. |
| <b>12. HOW WELL (actual)</b>  | This will be reported in the primary paper.                                                                                                                                                                                                                                                                                                                                                         |                                                                                                                                                                                                                                                                                                                                                                                                   |

245 TIDieR, Template for Intervention Description and Replication; ADG, Australian Dietary Guidelines

1  
2 246 *Standard care low-fat dietary program*  
3  
4

5 247 Participants allocated to the standard care low-fat dietary program will receive advice and  
6  
7 248 education regarding healthy eating based on the Australian Dietary Guidelines.(39) These  
8  
9 249 government-endorsed guidelines aim to optimise nutrition intake through adequate  
10  
11 250 consumption of foods from the five core food groups (grains and cereals; fruit; vegetables and  
12  
13 251 legumes; lean meats and poultry, fish, eggs, and tofu; reduced fat dairy or alternatives), while  
14  
15 252 limiting intake of foods containing saturated fat, added salt, added sugars and alcohol. They are  
16  
17 253 high-carbohydrate and low-fat focused – participants will be encouraged to include at least four  
18  
19 254 serves of wholegrains daily (e.g., brown rice, pasta, bread, quinoa, oats) and to choose low-fat  
20  
21 255 protein and dairy foods where possible.  
22

23  
24  
25 257 The program will be delivered through individual consultations with the treating dietitian or other  
26  
27 258 specially trained health professional – the first in-person consultation immediately following  
28  
29 259 baseline assessment (~45 minutes), the second via phone/videoconference at 6 weeks (~30  
30  
31 260 minutes) and the third in-person at 12-week follow-up with timing individualised as required.  
32  
33 261 Two to three consultations represents usual care for patients referred for dietary management  
34  
35 262 in Australia through the current public healthcare (Medicare) rebate system.(37, 38) During the  
36  
37 263 initial in-person consultation, participants will be provided with a bespoke educational booklet  
38  
39 264 and advice and education emphasising the Australian Dietary Guideline principles  
40  
41 265 (<https://www.eatforhealth.gov.au/guidelines>) and informed of complementary and publicly  
42  
43 266 available online resources from the Eat for Health website (<https://www.eatforhealth.gov.au/>).  
44

45  
46 268 The follow-up phone/videoconference consultation in week-6 and in-person follow-up in week-  
47  
48 269 12 will provide participants with ongoing support, education and accountability. The 3-day food  
49  
50 270 diary, completed prior to each consultation (see outcomes/adherence section), will guide  
51  
52 271 feedback and support to adapt meal plans to optimise adherence. The treating health  
53  
54 272 professionals delivering the two dietary programs will be based centrally at La Trobe University  
55  
56 273 and will be trained by the senior study dietitian (BLD) until deemed competent in intervention  
57  
58 274 delivery.  
59

60 275

1  
2 276 Irrespective of group allocation, participants can continue usual medical care and consult with  
3  
4 277 their treating health professionals as necessary (e.g., general practitioner regarding medication  
5  
6 278 changes).

7 279

## 9 280 **Data collection procedure**

11 281 Data will be collected at baseline and 6 weeks, 12 weeks and 6 months after randomisation, with  
12  
13 282 12 weeks the *a priori* primary endpoint as this coincides with completion of supported  
14  
15 283 interventions (table 3). Where possible, data will be collected and managed using a secure web-  
16  
17 284 based software platform (REDCap®) hosted at La Trobe University,(40) which has equivalent  
18  
19 285 measurement properties to paper-based completion.(41) This strategy was used in our pilot  
20  
21 286 study(28) and other trials of musculoskeletal conditions.(42) Paper versions will also be available  
22  
23 287 if preferred.

24 288

## 26 289 **OUTCOMES**

### 28 290 **Baseline characteristics**

30 291 Participant characteristics including age, sex, ethnicity, knee pain/surgery details, socioeconomic  
31  
32 292 details (e.g., education level, employment status, living status), medical history and health  
33  
34 293 literacy (assessed with the Rapid Estimate of Adult Literacy in Medicine (REALM)(43)) will be  
35  
36 294 collected (table 3).

37 295

### 39 296 **Primary Outcome**

41 297 The primary outcome is the change from baseline to 12 weeks in the mean score on four Knee  
42  
43 298 injury and Osteoarthritis Outcome Score (KOOS<sub>4</sub>) subscales covering knee pain, symptoms,  
44  
45 299 function in daily activities and knee-related quality of life. The KOOS is a 42-item patient-reported  
46  
47 300 outcome measure assessing five separately scored subscales: Pain, Symptoms, Function in Sport  
48  
49 301 and Recreation (Sport/Rec), Activities of Daily Living (ADL), and Quality of Life. The KOOS<sub>4</sub> and all  
50  
51 302 KOOS subscale scores range from 0 (extreme problems) to 100 (no problems). The KOOS is a  
52  
53 303 valid, responsive and reliable questionnaire, with KOOS<sub>4</sub> a primary outcome for other knee OA  
54  
55 304 trials.(33, 44, 45)

56 305

57 306

58 307

59 308



309

310 **Table 3.** Overview of data collection

| Variable                                      | Baseline | 6 weeks | 12 weeks | 6 months |
|-----------------------------------------------|----------|---------|----------|----------|
| <b>Participant characteristics</b>            |          |         |          |          |
| Age                                           | X        |         |          |          |
| Sex                                           | X        |         |          |          |
| Ethnicity                                     | X        |         |          |          |
| Education level                               | X        |         |          |          |
| Health literacy (REALM)                       | X        |         |          |          |
| Employment status                             | X        |         |          |          |
| Smoking status                                | X        |         |          |          |
| Civil status, living situation                | X        |         |          |          |
| Medical history, comorbidities                | X        |         |          |          |
| Knee pain/injury/surgery history              | X        |         |          |          |
| <b>Objective Clinical Outcomes</b>            |          |         |          |          |
| Height, weight, waist girth                   | X        |         | X        | X        |
| 30-second chair stand test                    | X        |         | X        | X        |
| 40 metre walk test                            | X        |         | X        | X        |
| Body composition (DXA)                        | X        |         | X        | X        |
| Blood inflammatory and metabolic biomarkers   | X        |         | X        | X        |
| Blood pressure                                | X        |         | X        | X        |
| <b>Patient-reported Outcomes</b>              |          |         |          |          |
| KOOS subscales                                | X        | X       | X        | X        |
| Global rating of change                       |          | X       | X        | X        |
| Desire for knee surgery                       | X        | X       | X        | X        |
| Medication use                                | X        | X       | X        | X        |
| Knee pain (current and worst in past week)    | X        | X       | X        | X        |
| EQ-5D-5L <sup>^</sup>                         | X        | X       | X        | X        |
| Patient acceptable symptom state              | X        | X       | X        | X        |
| Brief Pain Inventory                          | X        |         | X        | X        |
| International Physical Activity Questionnaire | X        |         | X        | X        |
| Kessler Psychological Distress Scale (K10)    | X        |         | X        | X        |
| 3-day Food Diaries*                           | X        | X       | X        | X        |
| Adverse events                                |          | X       | X        | X        |

311 REALM, Rapid Estimate of Adult Literacy in Medicine; KOOS, Knee injury and Osteoarthritis Outcome  
 312 Score; DXA, Dual-Energy X-ray absorptiometry

1  
2 313 \*3-day food diaries are also assessed prior to anti-inflammatory dietary program consultations at 2, 4 and  
3 314 9 weeks  
4

5 315 ^Assesses health-related quality of life across 5 dimensions of health (mobility, self-care, usual activities,  
6 316 pain/discomfort, anxiety/depression) and a visual analogue scale (0-100) of current overall health status.  
7 317  
8

9 318  
10

## 11 319 **Secondary effectiveness outcomes**

### 12 13 320 *KOOS subscales*

14  
15 321 To allow for clinical in-depth interpretation, scores for the five KOOS subscales will be reported  
16 322 individually (i.e., pain, symptoms, function in sports and recreational activities, activities of daily  
17 323 living, quality of life).(10, 45)  
18  
19  
20  
21 324

### 22 23 325 *Global Rating of Change (GROC) and patient-acceptable state*

24  
25 326 Self-perceived change in pain and function will be assessed using a 7-point Likert scale ranging  
26 327 from 'much worse' to 'much better' in response to the questions: "Overall, how has your knee  
27 328 pain changed since the start of the study?" and "Overall, how has your knee function changed  
28 329 since the start of the study?", respectively. Treatment success will be defined as a response of  
29 330 either 'better' or 'much better'. Satisfaction with current knee function using the self-reported  
30 331 Patient Acceptable Symptom State (PASS) question(46). Participants not satisfied with current  
31 332 knee function at follow-up assessments will be asked a second question to determine if they  
32 333 considered the treatment to have failed.(46)  
33  
34  
35  
36  
37  
38  
39  
40 334

### 41 42 335 *Anthropometrics*

43  
44 336 Height and weight will be assessed using a seca 217 stadiometer and seca 703 EMR-validated  
45 337 column scale (Hammer Steindamm, Hamburg, Germany), respectively. Waist circumference will  
46 338 be measured using a metal tape measure (Lufkin W606PM ¼ inch x 2m Executive Thinline Pocket  
47 339 Tape).  
48  
49  
50  
51 340

### 52 53 341 *Global lower-limb function*

54  
55 342 Two performance-based tests of lower-limb function recommended by the OA Research Society  
56 343 International (OARSI) will be conducted: the 30-second chair-stand test (number of chair-stands  
57  
58  
59  
60

1  
2 344 from a standardised height chair in 30 seconds) and 40-metre walk test (time to walk 40 metres  
3  
4 345 safely, using walking aids if required).(47)

5 346

7  
8 347 *Body composition*

9  
10 348 A whole-body DXA scan will be acquired using a Hologic Horizon® DXA scanner (Bedford, MA,  
11  
12 349 United States) to assess adiposity (visceral, peripheral) and lean mass.(48)

13  
14 350

16  
17 351 *Inflammatory and metabolic biomarkers*

18  
19 352 An array of blood inflammatory and metabolic biomarkers will be analysed from samples of blood  
20  
21 353 collected, including high sensitivity C-Reactive Protein (hsCRP), cytokines (IL-1 $\beta$ , IL-6, IL-8, IL-10,  
22  
23 354 TNF- $\alpha$ ), blood glucose, HbA1c, serum insulin, liver function tests (including albumin), and lipids  
24  
25 355 (e.g., high density lipoprotein, triglycerides). Participants will be instructed to fast for at least 10  
26  
27 356 hours prior to blood collection and a single forearm venepuncture will take place to collect a total  
28  
29 357 of  $\leq 30$  mL blood. Plasma and serum samples will be centrifuged (3000ms, 10 minutes), and all  
30  
31 358 samples (plasma, serum, and whole blood) frozen at -80°C for later analysis (Supplementary File  
32  
33 359 3).

34 360

35  
36 361 **Secondary safety outcomes**

37  
38 362 *Adverse events*

39  
40 363 Adverse events and serious adverse events will be recorded at 6-week, 12-week and 6-month  
41  
42 364 follow-up via open probe questioning to optimise collection of sufficient detail. Under the  
43  
44 365 Preferred Reporting Items for Systematic Reviews and Meta-Analyses (PRISMA) harms  
45  
46 366 statement, an adverse event is defined as any undesirable experience causing participants to  
47  
48 367 seek medical treatment (e.g., general practitioner).(49) A serious adverse event is defined as any  
49  
50 368 undesirable event/illness/injury classified as having the potential to significantly compromise  
51  
52 369 clinical outcome or result in significant disability or incapacity, those requiring inpatient or  
53  
54 370 outpatient hospital care, to be life-threatening or result in death.

55 371

56

57

58

59

60

## 372 **Exploratory outcomes**

### 373 *Dietary Analysis*

374 Participants will record food and beverage intake over three days via the smartphone application  
375 *Australia Calorie Counter - Easy Diet Diary* (Xyris Software Pty Ltd) or on paper (personal  
376 preference). Easy Diet Diary is a commercial calorie counter and food diary that allows users to  
377 email recorded diaries to treating professionals. Once received by the treating health  
378 professional, the 3-day food diaries will be imported into, and analysed using, Foodworks®  
379 Premium Edition nutrient analysis software (Version 10, Brisbane, Australia 2019) and Australian  
380 food composition databases. Paper-based 3-day food diaries will be manually entered into  
381 FoodWorks®. Total energy intake, macronutrients, micronutrients and core food group analysis  
382 will be reported. Dietary analysis data will also be used to calculate the inflammatory potential  
383 of participants' diets (e.g., Dietary Inflammatory Index).(50)

384

### 385 *Quality of life*

386 Health-related quality of life will be assessed with the EQ-5D-5L generic health index, which  
387 comprises five dimensions of health (mobility, self-care, usual activities, pain or discomfort,  
388 anxiety or depression) and a Visual Analogue Scale (VAS) of current overall health status.(51)  
389 Both validity and reliability has been demonstrated in arthritic populations.(52)

390

### 391 *Knee pain and interference*

392 Self-reported knee pain (current, worst over past week, average over past week) will be assessed  
393 using a 100mm VAS (0=no pain, 100=worst pain imaginable). The degree to which knee pain  
394 interferes with participant's daily functioning will be assessed using the Brief Pain Inventory,(53)  
395 a tool with reliability and validity demonstrated in knee pain populations.(54, 55)

396

### 397 *Change in analgesic medication use*

398 Change in analgesic medication use from baseline to 12-week and 6-month follow-up will be  
399 assessed with a 7-point Likert scale (much less to much more).

400

1  
2 401 *Physical activity*  
3

4 402 Physical activity will be assessed using the International Physical Activity Questionnaire  
5  
6 403 (IPAQ),(56) a standardised and valid questionnaire providing an estimate of physical activity and  
7  
8 404 sedentary behaviour, which has been widely validated.(56-58) Respondents are asked to report  
9  
10 405 time spent in physical activity across three intensities (walking, moderate, vigorous). Using the  
11  
12 406 IPAQ scoring protocol,(59) total weekly physical activity can be estimated by weighting time  
13  
14 407 spent in each activity intensity with its estimated metabolic equivalent (MET) energy  
15  
16 408 expenditure.(60)  
17

18  
19 410 *Blood pressure*  
20

21  
22 411 A pair of seated blood pressure measurements will be obtained using an automated monitor  
23  
24 412 (Omron Model HEM-7121). The blood pressure cuff is placed over the mid-upper arm with the  
25  
26 413 participant seated.  
27

28  
29 415 *Self-perceived wellness*  
30

31  
32 416 Self-reported sleep quality, hunger, fatigue and energy levels will be assessed using a 100mm  
33  
34 417 VAS (0=worst outcome, 100=best outcome).  
35

36 418  
37  
38 419 *Intervention adherence*  
39

40 420 Adherence will be assessed by a self-reported VAS (0=not at all adherent, 100=extremely  
41  
42 421 adherent) and 5-point Likert scale at 6 weeks, 12 weeks and 6 months and evaluation of 3-day  
43  
44 422 food diaries by consulting health professionals. Satisfactory adherence is defined as a self-report  
45  
46 423 of both  $\geq 80$  on the VAS and 'Most days' or 'Every day' on the Likert scale, at both the 6-week and  
47  
48 424 12-week timepoints.  
49

50 425 **DATA MANAGEMENT**  
51

52 426 Most outcome data will be collected and managed electronically via REDCap© web-based  
53  
54 427 software hosted at La Trobe University. Other data (e.g., DXA reports) will be stored electronically  
55  
56 428 on the La Trobe University secure research drive. All electronic data will be de-identified  
57  
58 429 (participant code) and exported for data analysis and saved in a password protected database on  
59  
60 430 the La Trobe University research drive only accessible to the research team. Paper-based  
431 identifying documents (e.g., consent forms) will be securely stored in a locked filing cabinet

1  
2 432 accessible only to members of the research team and separately from re-identifiable (i.e., coded)  
3  
4 433 data.

5 434  
6  
7 435 Due to the minimal known risks associated with the interventions being evaluated, our study will  
8  
9 436 not have a formal data monitoring committee and does not require an interim analysis. This is  
10  
11 437 the same approach we have taken with other low risk RCTs.(42) Any unexpected serious adverse  
12  
13 438 events or outcomes will be discussed by the trial management committee (authors of this  
14  
15 439 protocol) and reported to the approving human research ethics committee for monitoring.

16 440

### 18 441 **Sample size calculation**

20 442 This trial has been powered to detect a clinically significant between-group difference for the  
21  
22 443 primary outcome of KOOS<sub>4</sub>. A recent RCT comparing an anti-inflammatory diet vs low-caloric diet  
23  
24 444 in overweight women with knee OA observed an effect size (standardised mean difference) on  
25  
26 445 self-reported pain and function of 1.0 (95% confidence interval 0.5 to 1.6).(61) Given inherent  
27  
28 446 differences in the FEAST RCT (e.g., Australian Dietary Guideline control group, not specifically  
29  
30 447 targeting overweight participants, inclusion of both women and men), we used the lower bound  
31  
32 448 95% confidence interval to provide a conservative estimate of the anticipated effect size (0.5).  
33  
34 449 This estimated effect size is also a conservative estimate based on our single-arm anti-  
35  
36 450 inflammatory diet pilot trial, which had an effect size of 0.68.(28) Recruiting 128 participants  
37  
38 451 (equally distributed between two arms) would yield 80% power to observe such an effect or  
39  
40 452 larger at a two-tailed Type I error of 0.05. This sample size estimation is also conservative since  
41  
42 453 it is based on independent samples t-test. Using an ANCOVA model that includes the baseline  
43  
44 454 value as a covariate and is pre-specified for the analysis should provide higher power for the  
45  
46 455 same sample size.(62) To account for a potential 10% drop-out, we will recruit 144 participants.  
47  
48 456 This sample size will also be sufficient to detect a minimal important change (MIC) in KOOS<sub>4</sub>  
49  
50 457 estimated at 10 points in patients with knee OA (with a common between-subject standard  
51  
52 458 deviation of 15).(63)

51 459

### 53 460 **Statistical analyses**

55 461 Analysis will be performed according to the Estimands Framework(64) with a statistical analyst  
56  
57 462 blinded to group allocation. All outcomes and analyses are prospectively categorised as primary,  
58  
59 463 secondary or exploratory. For the primary hypothesis, a linear model with baseline value, sex and  
60  
61 464 BMI ( $\geq 30$  vs  $< 30$  kg.m<sup>-2</sup>) as covariates and treatment condition as a fixed factor will evaluate the

1  
2 465 treatment effect on the primary outcome of KOOS<sub>4</sub> (mean score of four of the five subscales of  
3  
4 466 the KOOS) at 12 weeks. A linear mixed model utilising repeated measures at all time-points for  
5  
6 467 secondary hypotheses will allow non-biased estimates of treatment effect in the presence of any  
7  
8 468 potential missing cases, providing data are missing at random. A sensitivity analysis using pattern-  
9  
10 469 mixture model to investigate the deviation from the missingness-at-random assumption will be  
11  
12 470 carried out.(65) For secondary binary outcomes (e.g., treatment success), mixed-effect logistic  
13  
14 471 regression models will be used to assess the effect of treatment. A subsequent analysis of  
15  
16 472 participants classified as adherent to the protocol will be performed.

### 17 473 18 474 **Healthcare resource use**

19  
20 475 Healthcare resource utilisation (e.g., hospitalisations, medical imaging, healthcare visits,  
21  
22 476 medication use) will be assessed by participant self-report to estimate costs associated with the  
23  
24 477 trial programs (e.g., hospital admissions, medication use, clinician visits, imaging tests, out-of-  
25  
26 478 pocket expenses).

### 27 479 28 29 480 **Process Evaluation**

30  
31 481 Semi-structured interviews will be conducted on a subset of consenting participants (until data  
32  
33 482 saturation reached) at 6 months. Interviews will explore experiences, knowledge and  
34  
35 483 understanding of interventions received including potential benefits; acceptability and perceived  
36  
37 484 effectiveness of the intervention; and reasons for adhering (or not) to the allocated diet.  
38  
39 485 Purposive sampling will be used to recruit interview participants based upon characteristics (anti-  
40  
41 486 inflammatory dietary program vs standard care low-fat dietary program, men vs women) and  
42  
43 487 outcomes of the trial (good outcome vs poor outcome). Interviews will be audio recorded,  
44  
45 488 transcribed and analysed using Framework Analysis,(66) a flexible technique allowing  
46  
47 489 researchers to identify, compare and contrast data according to inductively- and deductively-  
48  
49 490 derived themes. Data will be coded and an inductive thematic analysis will be applied until no  
50  
51 491 new themes emerge.

### 52 492 53 54 493 **ETHICS AND DISSEMINATION**

55  
56 494 This study complies with the Declaration of Helsinki and has received approval from La Trobe  
57  
58 495 University Human Ethics Committee (HEC-22044). Written informed consent will be obtained  
59  
60 496 from participants prior to enrolment (Supplementary File 4). Anti-inflammatory diets are  
497 associated with minimal and transient adverse events, thus there are minimal safety



1  
2 498 considerations associated with this trial.

3  
4 499

5 500 Study outcomes will be widely disseminated through a variety of sources. Results will be reported  
6  
7 501 in peer-reviewed publications and presented at key national and international conferences. Only  
8  
9 502 aggregate data will be reported. A lay summary report will be available for study participants.  
10  
11 503 Any important protocol amendments will be reported to the approving ethics committee,  
12  
13 504 registered at ANZCTR and communicated in the primary RCT paper. Any serious adverse events  
14  
15 505 will be recorded and reported to the approving ethics committee.

16 506

17  
18 507 Deidentified data will be made available upon reasonable request to the principal investigator  
19  
20 508 (AGC) after publication (except where the sharing of data is prevented by privacy, confidentiality,  
21  
22 509 or other ethical matters, or other contractual or legal obligations) according to La Trobe  
23  
24 510 University Research Data Management Policy.

25 511

## 26 512 **DISCUSSION**

27  
28  
29 513 The current RCT will be the first full-scale trial to evaluate the symptomatic, inflammatory,  
30  
31 514 functional and body composition benefits of an anti-inflammatory dietary program compared to  
32  
33 515 a standard care low-fat dietary program based on Australian Dietary Guidelines. While outcome  
34  
35 516 assessors are blinded to group allocation, owing to the type of interventions (i.e., dietary advice)  
36  
37 517 blinding of participants will not be possible. We also acknowledge that, like most RCTs, there is a  
38  
39 518 risk that our recruitment strategy may result in a selected sample not representative of the  
40  
41 519 general population. However, using similar recruitment strategies, our prior RCTs have resulted  
42  
43 520 in a representative sample of the culturally and sociodemographically diverse Australian  
44  
45 521 population that has similar characteristics to other international cohorts with the index  
46  
47 522 musculoskeletal condition.(67)

48 523

49 524 The evaluation of a non-pharmacological anti-inflammatory dietary program to improve pain,  
50  
51 525 symptoms, and quality of life for individuals with OA could have important individual and socio-  
52  
53 526 economic benefits – decreased healthcare dollars spent on managing OA and reduced surgery  
54  
55 527 waiting lists. Another benefit is that anti-inflammatory diets are also effective at combating  
56  
57 528 metabolic syndrome, a key risk factor for chronic diseases, and thus the benefits from treating  
58  
59 529 OA could stretch further to improving other medical co-morbidities.(68) This fully-powered RCT  
60  
60 530 represents a crucial step towards the development of a sustainable and cost-effective therapy

1  
2 531 that can both supplement and complement existing treatment strategies to optimise OA  
3  
4 532 outcomes.

5 533

6  
7 534

#### 8 9 535 **AUTHOR CONTRIBUTIONS**

10 536 AGC, BLD, PB and JLK conceived the study and obtained funding. AGC, BLD, PB, and JLK designed  
11  
12 537 the study protocol with input from LL, JJH and ABM. ADL provided statistical expertise and will  
13  
14 538 conduct primary statistical analysis. MDH provided blood analysis expertise and will lead  
15  
16 539 inflammatory and metabolic marker analyses. HGM and NPW assisted with participant  
17  
18 540 recruitment from their clinical population with knee osteoarthritis. LL drafted the manuscript  
19  
20 541 with input from AGC, JJH, BLD, PB, JLK, AA, MDH, ADL, ABM, HGM and NPW. All authors read  
21  
22 542 and approved the final manuscript.

23 543

#### 24 25 544 **FUNDING**

26  
27 545 This trial is supported by the National Health and Medical Research Council (NHMRC) of Australia  
28  
29 546 through an Investigator Grant held by AGC (GNT2008523), an Investigator Grant held by JLK  
30  
31 547 (APP2017844), and a philanthropic donation from PB.

32 548

#### 33 34 549 **COMPETING INTERESTS STATEMENT**

35  
36 550 PB is the founder of Defeat Diabetes and author of "A Fat Lot of Good". PB contributed to study  
37  
38 551 design but has no role in study execution, data management, analysis or the decision to publish.  
39  
40 552 The NHMRC has no role in study design and will not have any role in its execution, data  
41  
42 553 management, analysis and interpretation or on the decision to submit the results for publication.  
43  
44 554 JLK is an editor of the British Journal of Sports Medicine (British Medical Journal Group). AGC is  
45  
46 555 an associate editor of British Journal of Sports Medicine (British Medical Journal Group). All other  
47  
48 556 authors have no competing interests.

49 557

#### 50 51 558 **ACKNOWLEDGEMENTS**

52 559 We thank La Trobe University Medical Centre for assistance with blood collection, La Trobe  
53  
54 560 Nutrition and Dietetics department for the use of the nutrition lab and DXA scanner, and  
55  
56 561 Melbourne Pathology for providing pathology collection kits and analysis of biomarkers from  
57  
58 562 blood specimens.

59  
60 563

#### 564 **FIGURE LEGENDS**

1  
2 565 **Figure 1.** Flow of participants through the trial. DXA, Dual X-ray Absorptiometry; KOOS, Knee  
3  
4 566 injury and Osteoarthritis Outcome Score

5 567 \*Optional qualitative interview for process evaluation at 6 months  
6  
7 568  
8  
9 569

## 10 570 SUPPLEMENTARY FILES

11 571 **Supplementary File 1.** Sample of the standard care low fat dietary program participant booklet

12  
13 572 **Supplementary File 2.** Sample of the anti-inflammatory dietary program participant booklet

14  
15 573 **Supplementary File 3.** Standard Operating Procedures for blood collection, processing and  
16  
17 574 storage

18  
19  
20 575 **Supplementary File 4.** Patient information and consent form  
21  
22 576

## 23 24 25 577 REFERENCES

- 26  
27  
28 578 1. Cui A, Li H, Wang D, Zhong J, Chen Y, Lu H. Global, regional prevalence, incidence and risk factors  
29 579 of knee osteoarthritis in population-based studies. *EclinicalMedicine*. 2020;29-30:100587.
- 30 580 2. Duong V, Oo WM, Ding C, Culvenor AG, Hunter DJ. Evaluation and treatment of knee pain.  
31 581 *JAMA*. 2023;330:1568-80.
- 32 582 3. Weng Q, Goh S-L, Wu J, Persson MSM, Wei J, Sarmanova A, et al. Comparative efficacy of  
33 583 exercise therapy and oral non-steroidal anti-inflammatory drugs and paracetamol for knee or hip  
34 584 osteoarthritis: a network meta-analysis of randomised controlled trials. *British Journal of Sports*  
35 585 *Medicine*. 2023;bjsports-2022-105898.
- 36 586 4. Ackerman I, Bohensky M, Pratt C, Gorelik A, Liew D. Counting the Cost: Part 1 Healthcare costs.  
37 587 The current and future burden of arthritis2016.
- 38 588 5. Williams A, Kamper SJ, Wiggers JH, O'Brien KM, Lee H, Wolfenden L, et al. Musculoskeletal  
39 589 conditions may increase the risk of chronic disease: a systematic review and meta-analysis of cohort  
40 590 studies. *BMC Med*. 2018;16(1):167.
- 41 591 6. Pihl K, Roos EM, Taylor RS, Grønne DT, Skou ST. Associations between comorbidities and  
42 592 immediate and one-year outcomes following supervised exercise therapy and patient education - A  
43 593 cohort study of 24,513 individuals with knee or hip osteoarthritis. *Osteoarthritis Cartilage*.  
44 594 2021;29(1):39-49.
- 45 595 7. Juhl C, Christensen R, Roos EM, Zhang W, Lund H. Impact of exercise type and dose on pain and  
46 596 disability in knee osteoarthritis: a systematic review and meta-regression analysis of randomized  
47 597 controlled trials. *Arthritis Rheumatol*. 2014;66(3):622-36.
- 48 598 8. Henriksen M, Hansen JB, Klokke L, Bliddal H, Christensen R. Comparable effects of exercise and  
49 599 analgesics for pain secondary to knee osteoarthritis: a meta-analysis of trials included in Cochrane  
50 600 systematic reviews. *J Comp Eff Res*. 2016;5(4):417-31.
- 51 601 9. Barton CJ, Kemp JL, Roos EM, Skou ST, Dundules K, Pazzinatto MF, et al. Program evaluation of  
52 602 GLA:D® Australia: Physiotherapist training outcomes and effectiveness of implementation for people  
53 603 with knee osteoarthritis. *Osteoarthritis and Cartilage Open*. 2021;3(3):100175.
- 54 604 10. Roos EM, Grønne DT, Skou ST, Zywił MG, McGlasson R, Barton CJ, et al. Immediate outcomes  
55 605 following the GLA:D® program in Denmark, Canada and Australia. A longitudinal analysis including  
56 606 28,370 patients with symptomatic knee or hip osteoarthritis. *Osteoarthritis Cartilage*. 2021;29(4):502-6.
- 57 607 11. Das SK, Gilhooly CH, Golden JK, Pittas AG, Fuss PJ, Cheatham RA, et al. Long-term effects of 2  
58 608 energy-restricted diets differing in glycemic load on dietary adherence, body composition, and  
59 609 metabolism in CALERIE: a 1-y randomized controlled trial. *Am J Clin Nutr*. 2007;85(4):1023-30.

- 1  
2 610 12. Hall KD, Kahan S. Maintenance of Lost Weight and Long-Term Management of Obesity. *Med Clin*  
3 611 *North Am.* 2018;102(1):183-97.
- 4 612 13. Ansari MY, Ahmad N, Haqqi TM. Oxidative stress and inflammation in osteoarthritis  
5 613 pathogenesis: Role of polyphenols. *Biomed Pharmacother.* 2020;129:110452.
- 6 614 14. Goldring MB, Otero M. Inflammation in osteoarthritis. *Curr Opin Rheumatol.* 2011;23(5):471-8.
- 7 615 15. Strath LJ, Jones CD, Philip George A, Lukens SL, Morrison SA, Soleymani T, et al. The Effect of  
8 616 Low-Carbohydrate and Low-Fat Diets on Pain in Individuals with Knee Osteoarthritis. *Pain Med.*  
9 617 2020;21(1):150-60.
- 10 618 16. Galbete C, Kröger J, Jannasch F, Iqbal K, Schwingshackl L, Schwedhelm C, et al. Nordic diet,  
11 619 Mediterranean diet, and the risk of chronic diseases: the EPIC-Potsdam study. *BMC Medicine.*  
12 620 2018;16(1):99.
- 13 621 17. Simopoulos AP. The importance of the ratio of omega-6/omega-3 essential fatty acids. *Biomed*  
14 622 *Pharmacother.* 2002;56(8):365-79.
- 15 623 18. Esposito K, Maiorino MI, Bellastella G, Chiodini P, Panagiotakos D, Giugliano D. A journey into a  
16 624 Mediterranean diet and type 2 diabetes: a systematic review with meta-analyses. *BMJ Open.*  
17 625 2015;5(8):e008222.
- 18 626 19. Hussain T, Tan B, Yin Y, Blachier F, Tossou MC, Rahu N. Oxidative Stress and Inflammation: What  
19 627 Polyphenols Can Do for Us? *Oxid Med Cell Longev.* 2016;2016:7432797.
- 20 628 20. Neale EP, Batterham MJ, Tapsell LC. Consumption of a healthy dietary pattern results in  
21 629 significant reductions in C-reactive protein levels in adults: a meta-analysis. *Nutr Res.* 2016;36(5):391-  
22 630 401.
- 23 631 21. Ciaffi J, Mitselman D, Mancarella L, Brusi V, Lisi L, Ruscitti P, et al. The Effect of Ketogenic Diet on  
24 632 Inflammatory Arthritis and Cardiovascular Health in Rheumatic Conditions: A Mini Review. *Frontiers in*  
25 633 *Medicine.* 2021;8.
- 26 634 22. Russo GL. Dietary n-6 and n-3 polyunsaturated fatty acids: from biochemistry to clinical  
27 635 implications in cardiovascular prevention. *Biochem Pharmacol.* 2009;77(6):937-46.
- 28 636 23. Ricker MA, Haas WC. Anti-Inflammatory Diet in Clinical Practice: A Review. *Nutr Clin Pract.*  
29 637 2017;32(3):318-25.
- 30 638 24. Li J, Lee DH, Hu J, Tabung FK, Li Y, Bhupathiraju SN, et al. Dietary Inflammatory Potential and  
31 639 Risk of Cardiovascular Disease Among Men and Women in the U.S. *J Am Coll Cardiol.* 2020;76(19):2181-  
32 640 93.
- 33 641 25. D'Andrea Meira I, Romão TT, Pires do Prado HJ, Krüger LT, Pires MEP, da Conceição PO.  
34 642 Ketogenic Diet and Epilepsy: What We Know So Far. *Front Neurosci.* 2019;13:5.
- 35 643 26. Schönenberger KA, Schüpfer AC, Gloy VL, Hasler P, Stanga Z, Kaegi-Braun N, et al. Effect of Anti-  
36 644 Inflammatory Diets on Pain in Rheumatoid Arthritis: A Systematic Review and Meta-Analysis. *Nutrients.*  
37 645 2021;13(12).
- 38 646 27. Dyer J, Davison G, Marcora SM, Mauger AR. Effect of a Mediterranean Type Diet on  
39 647 Inflammatory and Cartilage Degradation Biomarkers in Patients with Osteoarthritis. *J Nutr Health Aging.*  
40 648 2017;21(5):562-6.
- 41 649 28. Cooper I, Brukner P, Devlin B, Reddy A, Fulton M, Kemp J, et al. An anti-inflammatory diet  
42 650 intervention for knee osteoarthritis: a feasibility study. *BMC Musculoskeletal Disorders.* 2022;23.
- 43 651 29. Chan A-W, Tetzlaff JM, Gøtzsche PC, Altman DG, Mann H, Berlin JA, et al. SPIRIT 2013  
44 652 explanation and elaboration: guidance for protocols of clinical trials. *BMJ : British Medical Journal.*  
45 653 2013;346:e7586.
- 46 654 30. Moher D, Hopewell S, Schulz KF, Montori V, Gøtzsche PC, Devereaux PJ, et al. CONSORT 2010  
47 655 Explanation and Elaboration: updated guidelines for reporting parallel group randomised trials. *BMJ.*  
48 656 2010;340:c869.
- 49 657 31. National Clinical Guideline C. National Institute for Health and Clinical Excellence: Guidance.  
50 658 Osteoarthritis: Care and Management in Adults. London: National Institute for Health and Care  
51 659 Excellence (UK)
- 52 660 Copyright © National Clinical Guideline Centre, 2014.; 2014.
- 53 661 32. Culvenor AG, Collins NJ, Guermazi A, Cook JL, Vicenzino B, Khan KM, et al. Early knee  
54 662 osteoarthritis is evident one year following anterior cruciate ligament reconstruction: a magnetic  
55 663 resonance imaging evaluation. *Arthritis Rheumatol.* 2015;67(4):946-55.

- 1  
2 664 33. Culvenor AG, Collins NJ, Guermazi A, Cook JL, Vicenzino B, Whitehead TS, et al. Early  
3 665 Patellofemoral Osteoarthritis Features One Year After Anterior Cruciate Ligament Reconstruction:  
4 666 Symptoms and Quality of Life at Three Years. *Arthritis Care Res (Hoboken)*. 2016;68(6):784-92.
- 5 667 34. Hoffmann TC, Glasziou PP, Boutron I, Milne R, Perera R, Moher D, et al. Better reporting of  
6 668 interventions: template for intervention description and replication (TIDieR) checklist and guide. *BMJ* :  
7 669 *British Medical Journal*. 2014;348:g1687.
- 8 670 35. Brukner DP. *A Fat Lot of Good*. 1 ed: Penguin Australia Pty Ltd; 2018. 368 p.
- 9 671 36. Wingrove K, Lawrence MA, Russell C, McNaughton SA. Evidence Use in the Development of the  
10 672 Australian Dietary Guidelines: A Qualitative Study. *Nutrients*. 2021;13(11):3748.
- 11 673 37. Cant RP. Patterns of delivery of dietetic care in private practice for patients referred under  
12 674 Medicare Chronic Disease Management: results of a national survey. *Aust Health Rev*. 2010;34(2):197-  
13 675 203.
- 14 676 38. Spencer L, O'Shea MC, Ball L, Desbrow B, Leveritt M. Attendance, weight and waist  
15 677 circumference outcomes of patients with type 2 diabetes receiving Medicare-subsidised dietetic  
16 678 services. *Aust J Prim Health*. 2014;20(3):291-7.
- 17 679 39. Health N, Council MR. *Australian dietary guidelines*. Canberra (Australia): National Health and  
18 680 Medical Research Council. 2013.
- 19 681 40. Harris PA, Taylor R, Minor BL, Elliott V, Fernandez M, O'Neal L, et al. The REDCap consortium:  
20 682 Building an international community of software platform partners. *J Biomed Inform*. 2019;95:103208.
- 21 683 41. Gudbergesen H, Bartels EM, Krusager P, Wæhrens EE, Christensen R, Danneskiold-Samsøe B, et  
22 684 al. Test-retest of computerized health status questionnaires frequently used in the monitoring of knee  
23 685 osteoarthritis: a randomized crossover trial. *BMC Musculoskeletal Disorders*. 2011;12(1):190.
- 24 686 42. Culvenor AG, West TJ, Bruder AM, Scholes MJ, Barton CJ, Roos EM, et al. SUPER exercise-  
25 687 therapy and Patient Education Rehabilitation (SUPER) versus minimal intervention for young adults at  
26 688 risk of knee osteoarthritis after ACL reconstruction: SUPER-Knee randomised controlled trial protocol.  
27 689 *BMJ Open*. 2023;13(1):e068279.
- 28 690 43. Davis TC, Crouch MA, Long SW, Jackson RH, Bates P, George RB, et al. Rapid assessment of  
29 691 literacy levels of adult primary care patients. *Fam Med*. 1991;23(6):433-5.
- 30 692 44. Skou ST, Roos EM, Laursen MB, Rathleff MS, Arendt-Nielsen L, Simonsen O, et al. A Randomized,  
31 693 Controlled Trial of Total Knee Replacement. *N Engl J Med*. 2015;373(17):1597-606.
- 32 694 45. Collins NJ, Prinsen CA, Christensen R, Bartels EM, Terwee CB, Roos EM. Knee Injury and  
33 695 Osteoarthritis Outcome Score (KOOS): systematic review and meta-analysis of measurement properties.  
34 696 *Osteoarthritis Cartilage*. 2016;24(8):1317-29.
- 35 697 46. Tubach F, Ravaud P, Baron G, Falissard B, Logeart I, Bellamy N, et al. Evaluation of clinically  
36 698 relevant states in patient reported outcomes in knee and hip osteoarthritis: the patient acceptable  
37 699 symptom state. *Ann Rheum Dis*. 2005;64(1):34-7.
- 40 700 47. Dobson F, Hinman RS, Roos EM, Abbott JH, Stratford P, Davis AM, et al. OARSI recommended  
41 701 performance-based tests to assess physical function in people diagnosed with hip or knee osteoarthritis.  
42 702 *Osteoarthritis and Cartilage*. 2013;21(8):1042-52.
- 43 703 48. Shepherd JA, Ng BK, Sommer MJ, Heymsfield SB. Body composition by DXA. *Bone*.  
44 704 2017;104:101-5.
- 45 705 49. Zorzela L, Loke YK, Ioannidis JP, Golder S, Santaguida P, Altman DG, et al. PRISMA harms  
46 706 checklist: improving harms reporting in systematic reviews. *Bmj*. 2016;352:i157.
- 47 707 50. Shivappa N, Steck SE, Hurley TG, Hussey JR, Hébert JR. Designing and developing a literature-  
48 708 derived, population-based dietary inflammatory index. *Public Health Nutr*. 2014;17(8):1689-96.
- 49 709 51. Janssen MF, Pickard AS, Golicki D, Gudex C, Niewada M, Scalone L, et al. Measurement  
50 710 properties of the EQ-5D-5L compared to the EQ-5D-3L across eight patient groups: a multi-country  
51 711 study. *Qual Life Res*. 2013;22(7):1717-27.
- 52 712 52. Hurst NP, Kind P, Ruta D, Hunter M, Stubbings A. Measuring health-related quality of life in  
53 713 rheumatoid arthritis: validity, responsiveness and reliability of EuroQol (EQ-5D). *Br J Rheumatol*.  
54 714 1997;36(5):551-9.
- 55 715 53. Cleeland CS, Ryan KM. Pain assessment: global use of the Brief Pain Inventory. *Ann Acad Med*  
56 716 *Singap*. 1994;23(2):129-38.
- 57 717 54. Mendoza T, Mayne T, Rublee D, Cleeland C. Reliability and validity of a modified Brief Pain  
58 718 Inventory short form in patients with osteoarthritis. *Eur J Pain*. 2006;10(4):353-61.



- 1  
2 719 55. Roth SH, Fleischmann RM, Burch FX, Dietz F, Bockow B, Rapoport RJ, et al. Around-the-Clock,  
3 720 Controlled-Release Oxycodone Therapy for Osteoarthritis-Related Pain: Placebo-Controlled Trial and  
4 721 Long-term Evaluation. *Archives of Internal Medicine*. 2000;160(6):853-60.
- 5 722 56. Craig CL, Marshall AL, Sjöström M, Bauman AE, Booth ML, Ainsworth BE, et al. International  
6 723 physical activity questionnaire: 12-country reliability and validity. *Med Sci Sports Exerc*.  
7 724 2003;35(8):1381-95.
- 8 725 57. Maddison R, Ni Mhurchu C, Jiang Y, Vander Hoorn S, Rodgers A, Lawes CM, et al. International  
9 726 Physical Activity Questionnaire (IPAQ) and New Zealand Physical Activity Questionnaire (NZPAQ): a  
10 727 doubly labelled water validation. *Int J Behav Nutr Phys Act*. 2007;4:62.
- 11 728 58. Cleland C, Ferguson S, Ellis G, Hunter RF. Validity of the International Physical Activity  
12 729 Questionnaire (IPAQ) for assessing moderate-to-vigorous physical activity and sedentary behaviour of  
13 730 older adults in the United Kingdom. *BMC Medical Research Methodology*. 2018;18(1):176.
- 14 731 59. Sjostrom M, Ainsworth BE, Bauman A, Bull FC, Hamilton-Craig CR, Sallis JF, editors. Guidelines  
15 732 for data processing analysis of the International Physical Activity Questionnaire (IPAQ) - Short and long  
16 733 forms2005.
- 17 734 60. AINSWORTH BE, HASKELL WL, WHITT MC, IRWIN ML, SWARTZ AM, STRATH SJ, et al.  
18 735 Compendium of Physical Activities: an update of activity codes and MET intensities. *Medicine & Science  
19 736 in Sports & Exercise*. 2000;32(9):S498-S516.
- 20 737 61. Dolatkah N, Toopchizadeh V, Barmaki S, Salekzamani Y, Najjari A, Farshbaf-Khalili A, et al. The  
21 738 effect of an anti-inflammatory in comparison with a low caloric diet on physical and mental health in  
22 739 overweight and obese women with knee osteoarthritis: a randomized clinical trial. *Eur J Nutr*.  
23 740 2023;62(2):659-72.
- 24 741 62. Borm GF, Fransen J, Lemmens WA. A simple sample size formula for analysis of covariance in  
25 742 randomized clinical trials. *J Clin Epidemiol*. 2007;60(12):1234-8.
- 26 743 63. Silva MDC, Perriman DM, Fearon AM, Couldrick JM, Scarvell JM. Minimal important change and  
27 744 difference for knee osteoarthritis outcome measurement tools after non-surgical interventions: a  
28 745 systematic review. *BMJ Open*. 2023;13(5):e063026.
- 29 746 64. Lynggaard H, Bell J, Lösch C, Besseghir A, Rantell K, Schoder V, et al. Principles and  
30 747 recommendations for incorporating estimands into clinical study protocol templates. *Trials*.  
31 748 2022;23(1):685.
- 32 749 65. White IR, Kalaitzaki E, Thompson SG. Allowing for missing outcome data and incomplete uptake  
33 750 of randomised interventions, with application to an Internet-based alcohol trial. *Statistics in Medicine*.  
34 751 2011;30:3192-207.
- 35 752 66. Ritchie J, Spencer L, editors. *Qualitative data analysis for applied policy research*2002.
- 36 753 67. Culvenor AG, West TJ, Bruder AM, Scholes MJ, Barton CJ, Roos EM, et al. Recruitment and  
37 754 baseline characteristics of young adults at risk of early-onset knee osteoarthritis after ACL  
38 755 reconstruction in the SUPER-Knee trial. under review. 2023.
- 39 756 68. Peiris CL, Culvenor AG. Metabolic syndrome and osteoarthritis: implications for the  
40 757 management of an increasingly common phenotype. *Osteoarthritis and Cartilage*. 2023;Online ahead of  
41 758 print.
- 42  
43  
44  
45  
46  
47 759  
48 760  
49  
50  
51  
52  
53  
54  
55  
56  
57  
58  
59  
60



Figure 1. Flow of participants through the trial. DXA, Dual X-ray Absorptiometry; KOOS, Knee injury and Osteoarthritis Outcome Score

\*Optional qualitative interview for process evaluation at 6 months

529x695mm (96 x 96 DPI)



1  
2  
3  
4  
5  
6  
7  
8  
9  
10  
11  
12  
13  
14  
15  
16  
17  
18  
19  
20  
21  
22  
23  
24  
25  
26  
27  
28  
29  
30  
31  
32  
33  
34  
35  
36  
37  
38  
39  
40  
41  
42  
43  
44  
45  
46  
47  
48  
49  
50  
51  
52  
53  
54  
55  
56  
57  
58  
59  
60

# FEAST

## SAMPLE FROM LOW-FAT PARTICIPANT BOOKLET

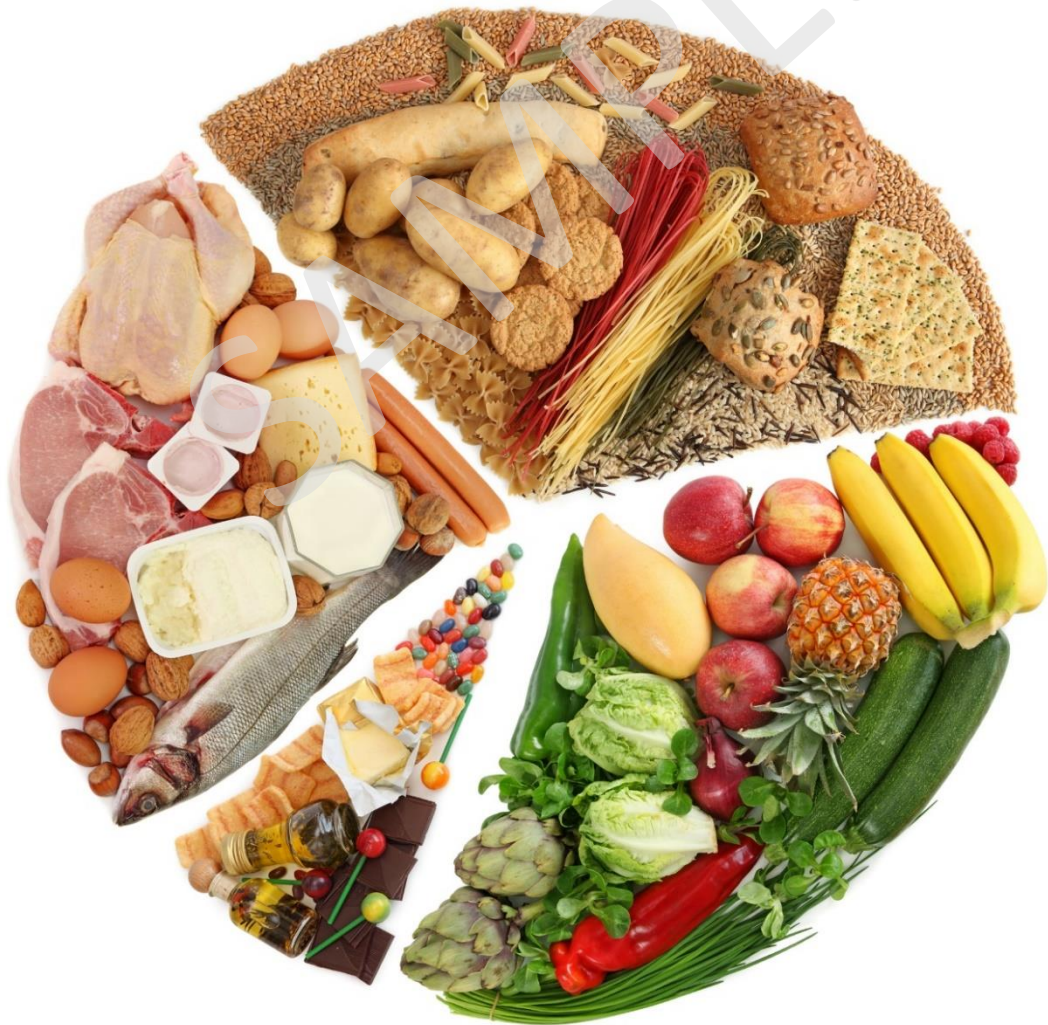



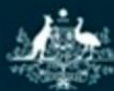

Australian Government  
National Health and Medical Research Council  
Department of Health and Ageing

www.eatforhealth.gov.au

# Australian Guide to Healthy Eating

Enjoy a wide variety of nutritious foods from these five food groups every day.

Drink plenty of water.

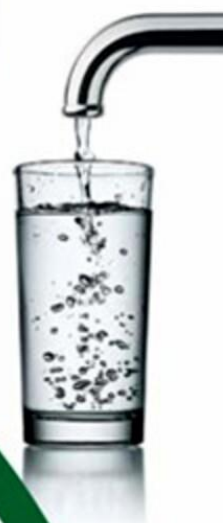

Grain (cereal) foods, mostly wholegrain and/or high cereal fibre varieties

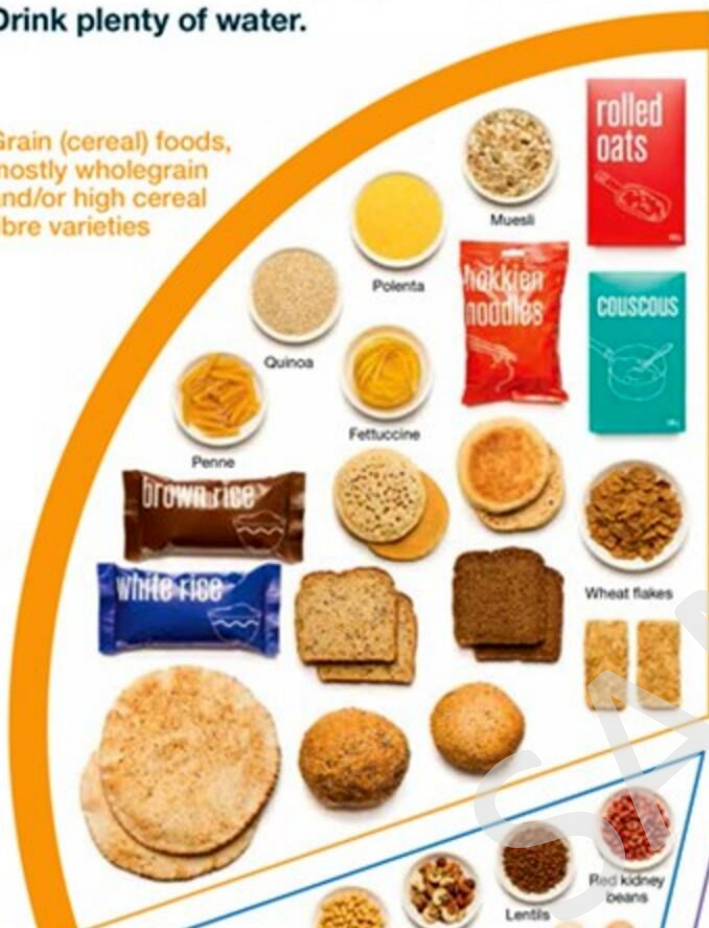

Vegetables and legumes/beans

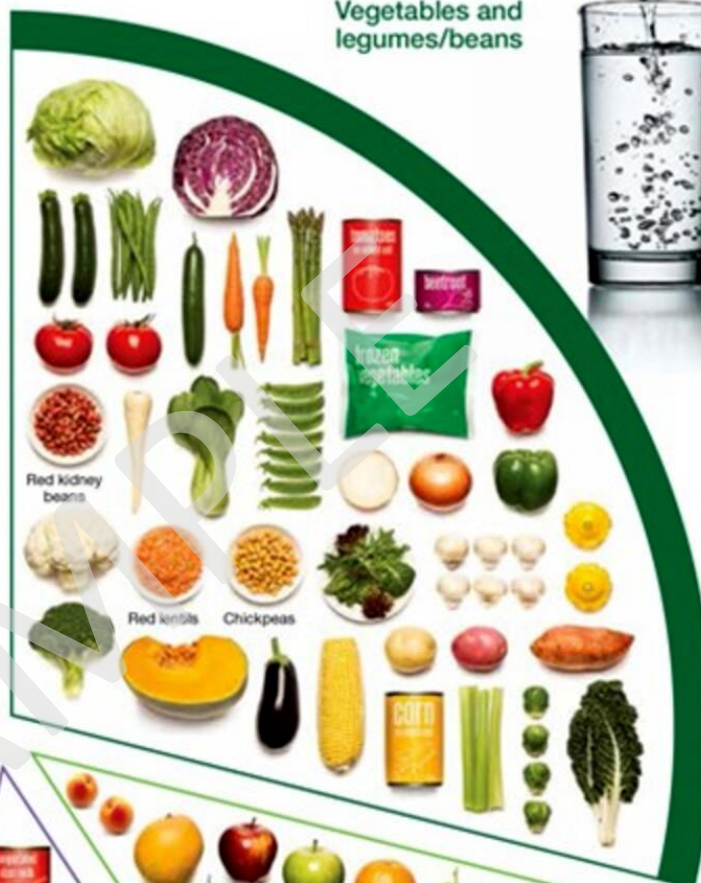

Lean meats and poultry, fish, eggs, tofu, nuts and seeds and legumes/beans

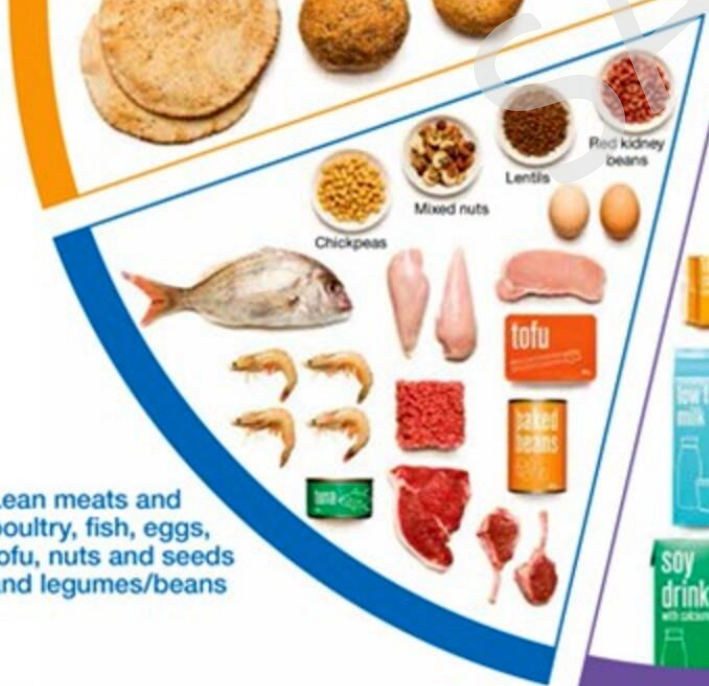

Fruit

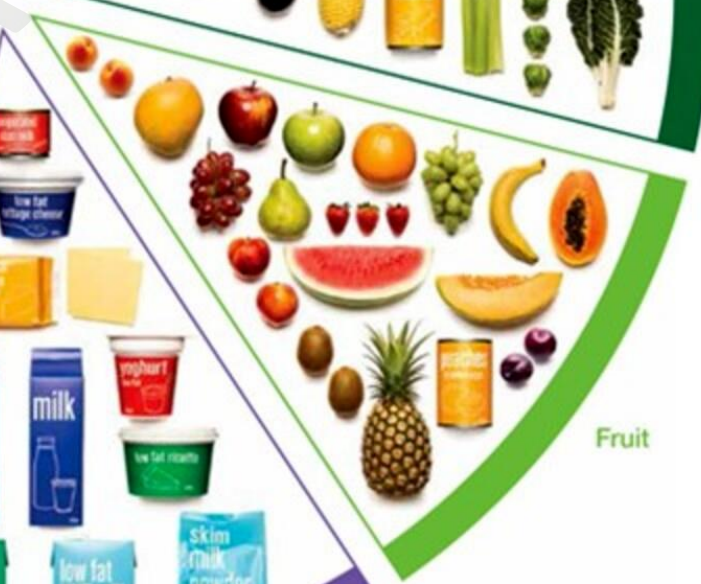

Milk, yoghurt, cheese and/or alternatives, mostly reduced fat

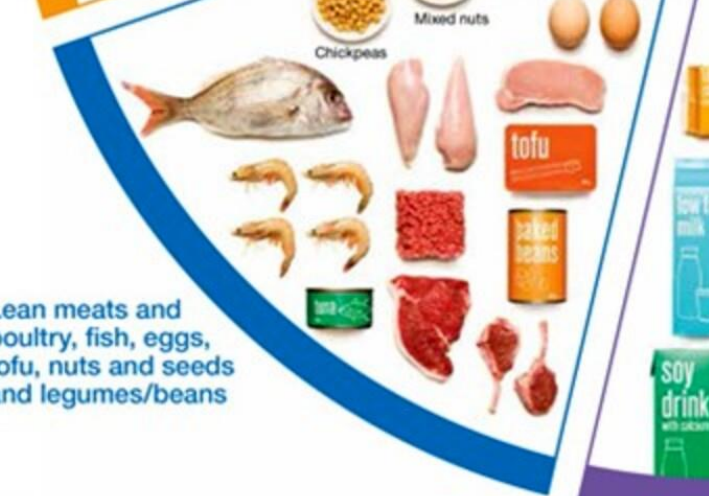

Use small amounts

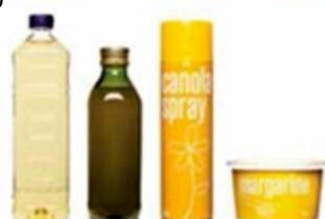

Only sometimes and in small amounts

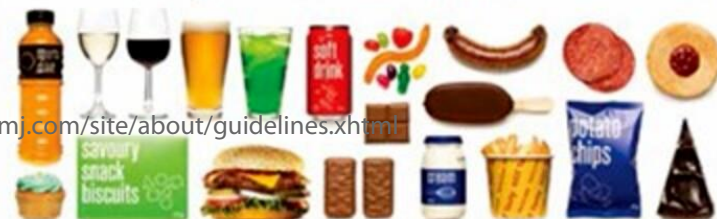



## Vegetables and legumes

Vegetables, including legumes/beans are nutrient dense, low in kilojoules, and are a good source of minerals and vitamins (such as magnesium, vitamin C and folate), dietary fibre and a range of natural plant chemicals such as carotenoids. Legumes include chickpeas, kidney beans, and peas. **Aim for 5 serves a day.**

### What is a serve of vegetables\*?

A standard serve is about 75g (100–350kJ) or:

|          |                                                                                        |
|----------|----------------------------------------------------------------------------------------|
| ½ cup    | cooked green or orange vegetables (for example, broccoli, spinach, carrots or pumpkin) |
| ½ cup    | cooked dried or canned beans, peas or lentils                                          |
| 1 cup    | green leafy or raw salad vegetables                                                    |
| ½ cup    | sweet corn                                                                             |
| ½ medium | potato or other starchy vegetables (sweet potato, taro or cassava)                     |
| 1 medium | tomato                                                                                 |

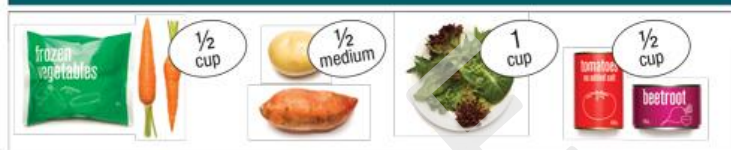

\*With canned varieties, choose those with no added salt

## Fruit

A wide variety of fruit is grown and available in Australia. Choosing fruits in season provides **better value and better quality**. And just like with veggies, choosing different coloured fruits increases the variety of nutrients, which can enhance your health! Aim for **two serves** of fruit a day.

Try eating fruits from these different fruit categories:

- citrus fruit such as oranges, mandarins, and grapefruit
- pome fruits such as apples and pears
- stone fruit such as apricots, cherries, peaches, nectarines, and plums
- tropical fruit such as bananas, papaya, mangoes, pineapple, and melons
- berries

### What is a serve of fruit?

A standard serve is about 150g (350kJ) or:

|          |                                        |
|----------|----------------------------------------|
| 1 medium | apple, banana, orange or pear          |
| 2 small  | apricots, kiwi fruits or plums         |
| 1 cup    | diced or canned fruit (no added sugar) |

Or only occasionally:

|               |                                                                               |
|---------------|-------------------------------------------------------------------------------|
| 125ml (½ cup) | fruit juice (no added sugar)                                                  |
| 30g           | dried fruit (for example, 4 dried apricot halves, 1½ tablespoons of sultanas) |

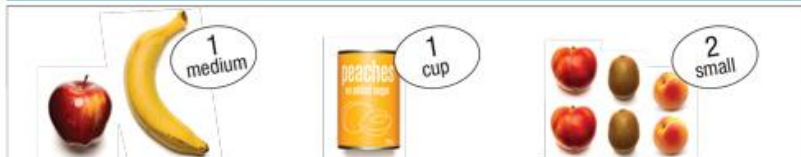

- other fruits such as grapes and passionfruit

Enjoy more fruit by trying:

- chopped fruit to cereal, porridge, salad, or toast
- fruit as a convenient snack while out and about
- fruit-based desserts (baked apples, fruit crumbles, stewed/ poached fruit)
- adding fruit to pancakes, scones, pikelets, and low-fat muffins.

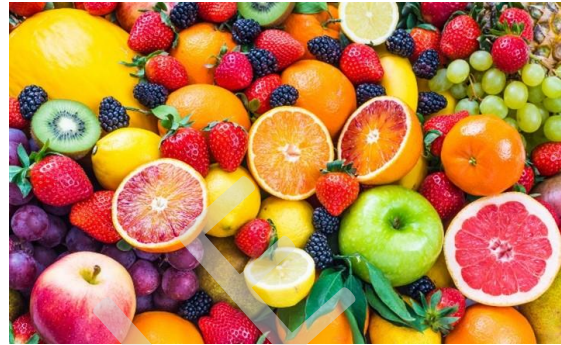

## Wholegrains

All types of grains are good sources of complex carbohydrates and some key vitamins and minerals. Grain foods are mostly made from wheat, oats, rice, rye, barley, millet, quinoa and corn.

Wholegrains are naturally high in fibre, helping you feel full and satisfied — which makes it easier to maintain a healthy body weight. Nutritionally, wholegrain and wholemeal foods are very similar.

### What is a serve of grain\* (cereal) food?

A standard serve is (500kJ) or:

|                 |                                                                                     |
|-----------------|-------------------------------------------------------------------------------------|
| 1 slice (40g)   | bread                                                                               |
| ½ medium (40g)  | roll or flat bread                                                                  |
| ½ cup (75-120g) | cooked rice, pasta, noodles, barley, buckwheat, semolina, polenta, bulgur or quinoa |
| ½ cup (120g)    | cooked porridge                                                                     |
| ⅔ cup (30g)     | wheat cereal flakes                                                                 |
| ¼ cup (30g)     | muesli                                                                              |
| 3 (35g)         | crispbreads                                                                         |
| 1 (60g)         | crumpet                                                                             |
| 1 small (35g)   | English muffin or scone                                                             |

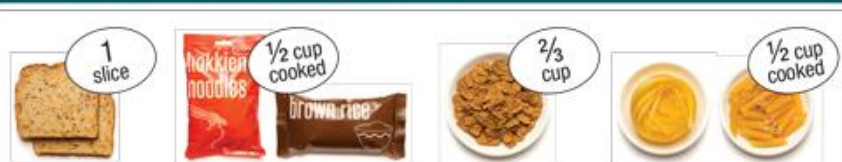

\*Grain (cereal) foods, mostly wholegrain and/or high cereal fibre varieties

For peer review only - <http://bmjopen.bmj.com/site/about/guidelines.xhtml>

Aim for 4-6 serves of grain foods a day. Additional serves can be eaten depending on your activity level.

### Enjoy more wholegrains by having:

- breakfasts that include whole-grain cereals, like oatmeal.
- wholemeal toast or wholemeal bagels for white-flour versions.
- low-fat muffins made with whole-grain flours.
- sandwiches using whole-grain breads or rolls.
- quinoa, brown rice, wild rice, barley or bulgur instead of white rice.
- wild rice or barley in soups, stews, casseroles and salads.
- rolled oats or crushed whole-wheat bran cereal in recipes instead of dry breadcrumbs.

### Lean meat and poultry, fish, eggs, tofu, nuts and seeds

These are a critical part of having enough protein each day. They also provide other nutrients such as: iodine, iron, zinc, vitamins, especially B12, and essential fatty acids.

There's a lot to choose from:

- Lean meats - Beef, lamb, veal, pork, kangaroo
- Poultry - Chicken, turkey, duck, emu, goose, bush birds
- Fish and seafood - Fish, prawns, crab, lobster, mussels, oysters, scallops, clams
- Eggs
- Nuts and seeds - Almonds, pine nuts, walnut, macadamia, hazelnut, cashew, peanut, nut spreads, and pumpkin seeds
- Legumes/beans - All beans, lentils, chickpeas, split peas, tofu.

**How much is a serve of lean meat and poultry, fish, eggs, nuts and seeds, and legumes/beans\*?**

**A standard serve is (500–600kJ):**

|                |                                                                                            |
|----------------|--------------------------------------------------------------------------------------------|
| 65g            | cooked lean red meats such as beef, lamb, veal, pork, goat or kangaroo (about 90-100g raw) |
| 80g            | cooked lean poultry such as chicken or turkey (100g raw)                                   |
| 100g           | cooked fish fillet (about 115g raw) or one small can of fish                               |
| 2 large (120g) | eggs                                                                                       |
| 1 cup (150g)   | cooked or canned legumes/beans such as lentils, chick peas or split peas                   |
| 170g           | tofu                                                                                       |
| 30g            | nuts, seeds, peanut or almond butter or tahini or other nut or seed paste                  |



\*Choose those with no added salt

## Milk, yoghurt, cheese, and/or alternatives

Dairy products (and dairy alternatives) are rich in calcium, protein, and lots of nutrients. Dairy foods contribute to strong bones. Aim for **at least 2-3 serves daily**.

Examples of milk, yoghurt, cheese and/or alternatives include:

- Milks - All reduced fat or full cream milks, plain and flavoured, long life milks, fortified soy beverages
- Yoghurt - All yoghurts including reduced fat or full cream, plain and flavoured, soy yoghurt (calcium fortified)
- Cheese - All hard cheeses, reduced or full fat for example cheddar, Gouda, Swiss

**How much is a serve of milk\*, yoghurt\*, cheese\* and/or alternatives?**

**A standard serve is (500–600kJ):**

|                |                                                                                |
|----------------|--------------------------------------------------------------------------------|
| 1 cup (250ml)  | fresh, UHT long life, reconstituted powdered milk or buttermilk                |
| ½ cup (120ml)  | evaporated milk                                                                |
| 2 slices (40g) | or 4 x 3 x 2cm cube (40g) of hard cheese, such as cheddar                      |
| ½ cup (120g)   | ricotta cheese                                                                 |
| ¾ cup (200g)   | yoghurt                                                                        |
| 1 cup (250ml)  | soy, rice or other cereal drink with at least 100mg of added calcium per 100ml |

**The following foods contain about the same amount of calcium as a serve of milk, yoghurt or cheese:**

|              |                                                    |
|--------------|----------------------------------------------------|
| 100g         | almonds with skin                                  |
| 60g          | sardines, canned in water                          |
| ½ cup (100g) | canned pink salmon with bones                      |
| 100g         | firm tofu (check the label as calcium levels vary) |

\*Choose mostly reduced fat



# FEAST

## SAMPLE OF ANTI-INFLAMMATORY PARTICIPANT BOOKLET

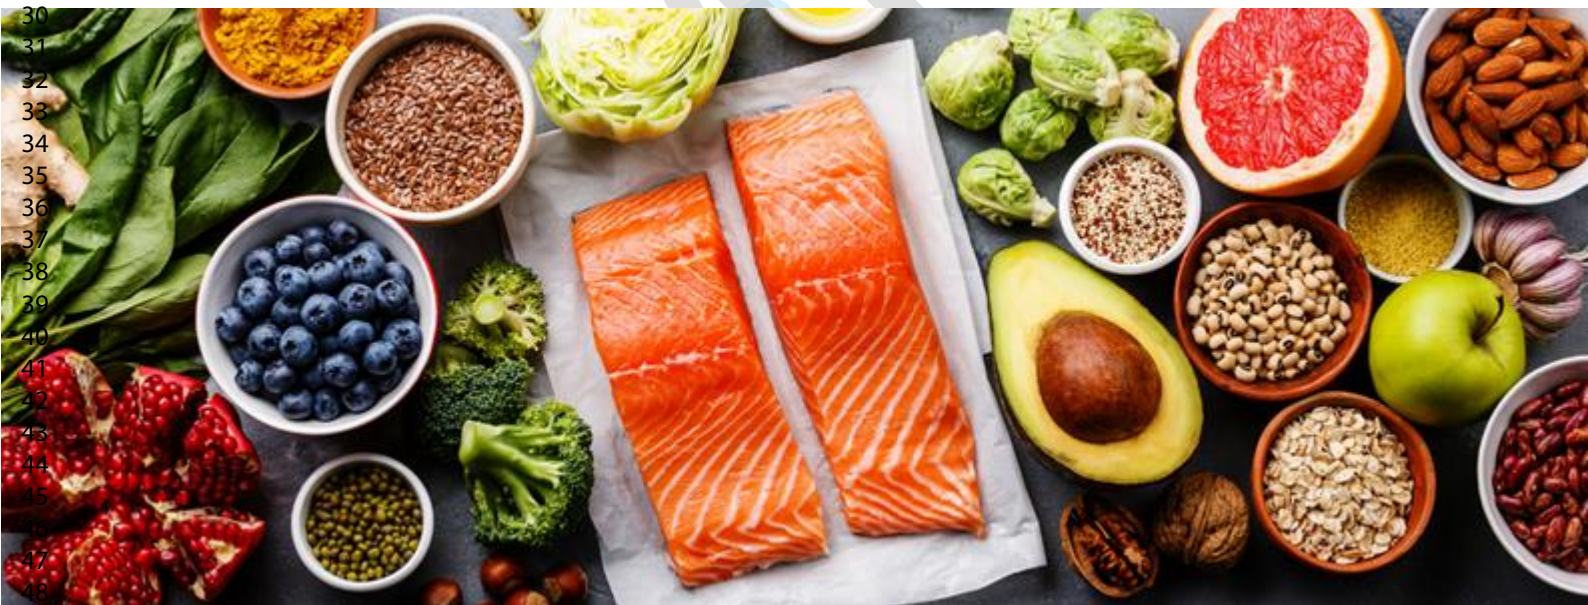



## EXAMPLE WEEKLY MEAL PLANS

Here are examples of what a week might look like. Consider these plans as a guide to give you ideas, not something written in stone! Most of the recipes below can be found on the **Defeat Diabetes** app, or by simply searching on Google online.

Lots of other anti-inflammatory/low-carbohydrate ideas online at: <https://www.eatthebutter.org/dinner-ideas/>

### Week 1

|                  | Monday                                          | Tuesday                      | Wednesday                 | Thursday                                        | Friday                                          | Saturday                                | Sunday                                     |
|------------------|-------------------------------------------------|------------------------------|---------------------------|-------------------------------------------------|-------------------------------------------------|-----------------------------------------|--------------------------------------------|
| <b>Breakfast</b> | Raspberrry chia pot                             | Yoghurt with berries         | Raspberrry chia pot       | Coconut crunch granola                          | Berry yoghurt smoothie                          | Scrambled eggs with spinach and avocado | Zucchini and feta fritters                 |
| <b>Snack</b>     | Apple with peanut butter                        | Hummus and veggies           | Apple with peanut butter  | Handful of almonds with piece of dark chocolate | Hummus and veggies                              | Apple with peanut butter                | Handful of walnuts                         |
| <b>Lunch</b>     | Roast vegetable salad                           | Salad with can of tuna       | Leftover prawn pad thai   | Leftover burrito bowl                           | Salad with can of tuna                          | Salmon with cauliflower rice bowl       | One pan spiced halloumi and eggplant       |
| <b>Snack</b>     | Handful of almonds with piece of dark chocolate | Almond meal blueberry muffin | Zucchini and feta fritter | Almond meal blueberry muffin                    | Handful of almonds with piece of dark chocolate | Yoghurt with berries                    | Almond meal blueberry muffin               |
| <b>Dinner</b>    | Garlic prawns with zoodles                      | Beef pad thai                | 15-minute burrito bowl    | Miso barramundi with vegetables                 | Swedish meatballs                               | Baked portobello mushrooms with feta    | Grilled lamb chops with roasted vegetables |

1  
2  
3  
4  
5  
6  
7  
8  
9  
10  
11  
12  
13  
14  
15  
16  
17  
18  
19  
20  
21  
22  
23  
24  
25  
26  
27  
28  
29  
30  
31  
32  
33  
34  
35  
36  
37  
38  
39  
40  
41  
42  
43  
44  
45  
46

## Week 2

|                  | Monday                           | Tuesday                                         | Wednesday                               | Thursday                                              | Friday                                     | Saturday                                         | Sunday                               |
|------------------|----------------------------------|-------------------------------------------------|-----------------------------------------|-------------------------------------------------------|--------------------------------------------|--------------------------------------------------|--------------------------------------|
| <b>Breakfast</b> | Coconut crunch granola           | Berry smoothie                                  | Scrambled eggs with spinach and avocado | Berry smoothie                                        | Coconut crunch granola                     | Scrambled eggs with spinach and avocado          | Shakshuka                            |
| <b>Snack</b>     | Mini frittata                    | Pear                                            | Apple with handful of almonds           | Pear                                                  | Mini frittata                              | Handful of walnuts with piece of dark chocolate  | Yoghurt with berries                 |
| <b>Lunch</b>     | Salad with sliced steak          | Easy Tuna Niçoise                               | Leftover stuffed capsicum               | Leftover burger patty with salad                      | Leftover green curry with cauliflower rice | Caesar salad                                     | Warm veggie salad with almonds       |
| <b>Snack</b>     | Slice of orange almond meal cake | Handful of walnuts with piece of dark chocolate | Mini frittata                           | Slice of orange almond meal cake                      | Apple with handful of almonds              | Yoghurt with berries                             | Pear                                 |
| <b>Dinner</b>    | Salmon poke bowl                 | Stuffed capsicums                               | Smoky beef burger on mushroom buns      | Green vegetable and prawn curry with cauliflower rice | Easy mushroom, lemon, and garlic chicken   | Cauliflower pizza with pesto, sausage, and herbs | Grilled steak and roasted vegetables |

## Week 3

|                  | Monday                      | Tuesday                                          | Wednesday                           | Thursday                      | Friday                                      | Saturday                             | Sunday                                     |
|------------------|-----------------------------|--------------------------------------------------|-------------------------------------|-------------------------------|---------------------------------------------|--------------------------------------|--------------------------------------------|
| <b>Breakfast</b> | Breakfast egg muffins       | Berry yoghurt smoothie                           | Breakfast egg muffins               | Chia pudding pot              | Berry yoghurt smoothie                      | Bacon and eggs with roasted tomatoes | Mexican breakfast scramble                 |
| <b>Snack</b>     | Chia pudding pot            | Beef jerky                                       | Greek yoghurt with berries          | Breakfast egg muffins         | Handful of almonds with cheese stick        | Apple with peanut butter             | Strawberry power balls                     |
| <b>Lunch</b>     | Zucchini and walnut salad   | Leftover beef burrito bowl                       | Leftover salmon patties with salad  | Greek salad                   | Leftover tagine                             | Kale, broccoli and almond salad      | Mushroom soup with crispy cheese croutons  |
| <b>Snack</b>     | Strawberry power balls      | Handful of almonds with square of dark chocolate | Strawberry power balls              | Handful of almonds with apple | Dark chocolate (avocado) mousse             | Beef jerky                           | Dark chocolate (avocado) mousse            |
| <b>Dinner</b>    | 15-minute beef burrito bowl | Salmon patties with feta sauce and beet salad    | Chicken curry with cauliflower rice | Lamb and apricot tagine       | Pan-seared barramundi with cauliflower mash | Zucchini lasagne                     | Grilled lamb chops with roasted vegetables |

## Week 4

|                  | Monday                    | Tuesday                           | Wednesday                 | Thursday                          | Friday                    | Saturday      | Sunday                |
|------------------|---------------------------|-----------------------------------|---------------------------|-----------------------------------|---------------------------|---------------|-----------------------|
| <b>Breakfast</b> | Coconut granola with milk | Blueberry almond protein smoothie | Vegetable cheese frittata | Blueberry almond protein smoothie | Coconut granola with milk | Tofu scramble | Almond flour pancakes |

|    |               |                                     |                                              |                                 |                                    |                                        |                                            |                                             |
|----|---------------|-------------------------------------|----------------------------------------------|---------------------------------|------------------------------------|----------------------------------------|--------------------------------------------|---------------------------------------------|
| 1  | <b>Snack</b>  | Roasted chickpeas                   | Slice of almond flour banana bread           | Greek yoghurt with berries      | Peanut butter balls                | Beef jerky                             | Roasted chickpeas                          | Handful of walnuts                          |
| 2  |               |                                     |                                              |                                 |                                    |                                        |                                            |                                             |
| 3  |               |                                     |                                              |                                 |                                    |                                        |                                            |                                             |
| 4  |               |                                     |                                              |                                 |                                    |                                        |                                            |                                             |
| 5  | <b>Lunch</b>  | Vegetable cheese frittata           | Leftover roast vegetable salad with halloumi | Leftover broccoli and leek soup | Vegetable cheese frittata          | Kale Caesar salad                      | Leftover stuffed capsicums                 | Creamy Tuscan soup                          |
| 6  |               |                                     |                                              |                                 |                                    |                                        |                                            |                                             |
| 7  |               |                                     |                                              |                                 |                                    |                                        |                                            |                                             |
| 8  |               |                                     |                                              |                                 |                                    |                                        |                                            |                                             |
| 9  | <b>Snack</b>  | Slice of almond flour banana bread  | Handful of almonds with dark chocolate       | Roasted chickpeas               | Slice of almond flour banana bread | Handful of almonds with dark chocolate | Greek yoghurt with berries                 | Peanut butter balls                         |
| 10 |               |                                     |                                              |                                 |                                    |                                        |                                            |                                             |
| 11 |               |                                     |                                              |                                 |                                    |                                        |                                            |                                             |
| 12 |               |                                     |                                              |                                 |                                    |                                        |                                            |                                             |
| 13 | <b>Dinner</b> | Roast vegetable salad with halloumi | Cheesy broccoli soup                         | Spicy tofu san choi bao         | Vegetarian stuffed zucchini boats  | Stuffed capsicums                      | Beetroot & halloumi salad with pomegranate | Spiced eggplant curry with cauliflower rice |
| 14 |               |                                     |                                              |                                 |                                    |                                        |                                            |                                             |
| 15 |               |                                     |                                              |                                 |                                    |                                        |                                            |                                             |
| 16 |               |                                     |                                              |                                 |                                    |                                        |                                            |                                             |
| 17 |               |                                     |                                              |                                 |                                    |                                        |                                            |                                             |
| 18 |               |                                     |                                              |                                 |                                    |                                        |                                            |                                             |
| 19 |               |                                     |                                              |                                 |                                    |                                        |                                            |                                             |
| 20 |               |                                     |                                              |                                 |                                    |                                        |                                            |                                             |
| 21 |               |                                     |                                              |                                 |                                    |                                        |                                            |                                             |
| 22 |               |                                     |                                              |                                 |                                    |                                        |                                            |                                             |
| 23 |               |                                     |                                              |                                 |                                    |                                        |                                            |                                             |
| 24 |               |                                     |                                              |                                 |                                    |                                        |                                            |                                             |
| 25 |               |                                     |                                              |                                 |                                    |                                        |                                            |                                             |
| 26 |               |                                     |                                              |                                 |                                    |                                        |                                            |                                             |
| 27 |               |                                     |                                              |                                 |                                    |                                        |                                            |                                             |
| 28 |               |                                     |                                              |                                 |                                    |                                        |                                            |                                             |
| 29 |               |                                     |                                              |                                 |                                    |                                        |                                            |                                             |
| 30 |               |                                     |                                              |                                 |                                    |                                        |                                            |                                             |
| 31 |               |                                     |                                              |                                 |                                    |                                        |                                            |                                             |
| 32 |               |                                     |                                              |                                 |                                    |                                        |                                            |                                             |
| 33 |               |                                     |                                              |                                 |                                    |                                        |                                            |                                             |
| 34 |               |                                     |                                              |                                 |                                    |                                        |                                            |                                             |
| 35 |               |                                     |                                              |                                 |                                    |                                        |                                            |                                             |
| 36 |               |                                     |                                              |                                 |                                    |                                        |                                            |                                             |
| 37 |               |                                     |                                              |                                 |                                    |                                        |                                            |                                             |
| 38 |               |                                     |                                              |                                 |                                    |                                        |                                            |                                             |
| 39 |               |                                     |                                              |                                 |                                    |                                        |                                            |                                             |
| 40 |               |                                     |                                              |                                 |                                    |                                        |                                            |                                             |
| 41 |               |                                     |                                              |                                 |                                    |                                        |                                            |                                             |
| 42 |               |                                     |                                              |                                 |                                    |                                        |                                            |                                             |
| 43 |               |                                     |                                              |                                 |                                    |                                        |                                            |                                             |
| 44 |               |                                     |                                              |                                 |                                    |                                        |                                            |                                             |
| 45 |               |                                     |                                              |                                 |                                    |                                        |                                            |                                             |
| 46 |               |                                     |                                              |                                 |                                    |                                        |                                            |                                             |

1  
2  
3 FEAST Project  
4  
5

---

6 **Standard Operating Procedure**  
7

8  
9 **Blood collection, processing, handling, and storage procedures**  
10

---

11  
12  
13  
14  
15  
16  
17  
18  
19  
20  
21  
22  
23  
24  
25  
26  
27  
28  
29  
30  
31  
32  
33  
34  
35  
36  
37  
38  
39  
40  
41  
42  
43  
44  
45  
46  
47  
48  
49  
50  
51  
52  
53  
54  
55  
56  
57  
58  
59  
60

For peer review only

## 1.1 Purpose

The purpose of the current SOP is to provide step-by-step instructions on the exact procedures that the research team needs to follow for conducting venous blood collection for biochemical analysis at baseline and follow-up examination.

## 1.2 General procedures for venous blood collection

Venous blood samples will be obtained from each participant for biochemical analysis following a 12-hour overnight fast, at baseline (T1), 12 weeks (T2) and 6 months (T3) (figure 1)

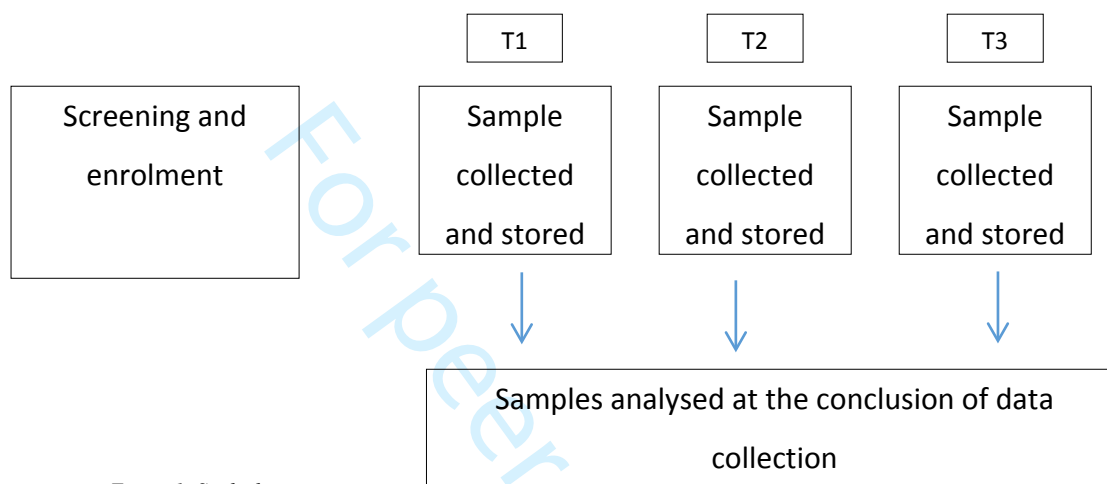

Figure 1: Study design

The researcher will perform venepuncture to obtain no more than 30mL of blood.

### 1.2.1 Consumables and supplies required for performing venepuncture

The consumables and supplies that will be used for performing the venepuncture in the study are the following:

- Disposable Latex gloves must be worn by the researcher and anyone else assisting with blood collection.
- Alcohol swab will be used to clean the venepuncture site.
- Winged steel needles appropriate for adults with an extension tube (a butterfly) will be used. The butterfly will have either a syringe or an evacuated tube with an adaptor. Sterile gauze pads will.....
- Adhesive hypo allergic bandages (plasters or Band-Aids) will be applied to the puncture site to minimize the risk of infection.
- Plastic Bag for Waste will be used to dispose all of the biohazardous waste generated as well as a sharps biocontainer to dispose of all needles.

### 1.2.2 Steps in obtaining venous blood from the participant

The steps for obtaining venous blood samples from the study participants are provided below:

**Step 1:** Complete general preparation.

- Find an indoor site to encourage privacy during blood collection. The site should have a table or other piece of furniture with a flat surface where you can lay out all consumables/ supplies. An examination bed should be readily available if the respondent feels faint and needs to lie down.
- Ensure that each subject has completed a 10-hour fast.

- Wash and dry hands, put on gloves before initiating blood collection from the participant.
- Take out a clean absorbent paper sheet and spread it over a flat surface to lay out consumable and supplies.

**Step 2:** Prepare the participant for the venepuncture.

- The individual should be seated comfortably in a chair with arm extended on the slanting armrest to form a straight line from the shoulder to the wrist. The arm and elbow should be supported firmly by the armrest and should not be bent at the elbow.
- Ask each volunteer if they have a history of fainting. If so, ensure that the blood sample is only drawn whilst the subject is lying down on a bed.
- Describe to the participant exactly what will be done during the collection of the blood sample.

**Step 3:** Prepare the venepuncture site.

- Apply (tighten) tourniquet.
- Ask the participant to close his/her hand so that the veins will become more prominent and thus easier to enter. Vigorous hand exercise or "pumping" should be avoided.
- Select the vein site. Palpate and trace the path of veins several times with the index finger. If superficial veins are not readily apparent, blood can be forced into the vein by gently massaging the arm from wrist to elbow. Several sharp taps at the vein site with index and second finger will cause the vein to dilate.
- Loosen tourniquet.
- The venepuncture site must be cleansed once with an alcohol swab to prevent any chemical or microbiologic contamination of either the patient or the specimen.
- Check equipment, tube selection and thread needle (or butterfly) securely onto tube holder (barrel).
- Re-apply the tourniquet and relocated vein position and direction. A tourniquet allows the veins to fill with blood, thus making the veins more prominent and easier to enter. Do not leave the tourniquet on for longer than 1 minute otherwise it may result in either hemoconcentration or variation in blood test values.
- Remove needle cover and check bevel is orientated uppermost.

**Step 4:** Blood drawing

- Puncture the skin 3–5 mm away from the vein; this allows good access without pushing the vein away.
- If the needle enters alongside the vein rather than into it, withdraw the needle slightly without removing it completely, and angle it into the vessel.
- Insert the tube into the holder and commence filling the tubes.
- Draw blood slowly and steadily.
- Release the tourniquet as soon as blood flow is established. Tourniquet release allows the blood circulation to return to normal and also reduces bleeding at the venipuncture site.
- Remove the tube from the holder and invert (8-10 times) to mix the blood with tube additives. Place blood samples on ice if required..
- Place a cotton wool above the venepuncture site, withdraw the needle and apply pressure.
- Dispose of needle in a sharps container.
- Check site and apply an adhesive bandage.
- Label all tubes immediately.



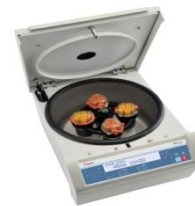

### 1.3 Blood processing and handling

#### 1.3.1 Centrifuge procedure

Collected venous blood will be centrifuged and the extracted plasma and/or serum will be pipetted into aliquots according to the blood collection protocol.

- Set up in a well-ventilated environment, on a horizontally levelled and rigid surface with adequate load-bearing capacity.
- As safety zone maintain a clear radius of at least 30 cm around the centrifuge. Do not place any dangerous substances within this security zone.
- Open the centrifuge door by pressing the open button.
- Place the remaining tubes containing blood into appropriate sized adapters.
- Place the tubes containing water in opposite adapters, where they should mirror the placement of the tubes holding blood.
- Never place both tubes housing water and blood into the same adapters but should be placed in different adapters for even weight distribution.
- Place the adapters carefully and gently into the rotor buckets
- Seal the buckets with the lids and close the centrifuge.
- Use only with rotors which have been loaded properly.
- Make sure the rotor is locked properly into place before operating the centrifuge.
- Never overload the rotor.
- Never start the centrifuge when the centrifuge door is open.
- Do not lean on the centrifuge.
- Do not place anything on top of the centrifuge during a run.
- Gently close the centrifuge door. The centrifuge door mechanism will click and lock in place.
- Turn on the centrifuge by pressing the start button.
- Select the required speed and time from preprogrammed setting or manually using the arrow keys (3000xg for 10 mins for each tube).

Once the centrifuge has completely stopped spinning wait for an audible sound and then open the centrifuge. Remove the tubes from the centrifuge and place them in a tube rack.

#### 1.3.2 Handling of collected blood

Three different types of test tubes will be used per study participant to collect venous blood. The collected blood will be designated for whole blood, or plasma and serum separation. One 8ml EDTA tube (with added anticoagulant) will be used to collect whole blood for analysis, one 6ml heparin tube will be used for plasma extraction, and one 8.5ml SST tube will be used for serum extraction. Tubes will be labelled with study timepoint (T1, T2 or T3), participant ID, and type of sample. All information regarding blood collection tubes is presented in Table 1.

**Table 1.** Volume of blood in different test tubes

| Test tube           | Blood volume | Designated for:           |
|---------------------|--------------|---------------------------|
| EDTA tube           | 6 ml         | Whole blood               |
| Heparin gel tube    | 6 ml         | Heparin plasma extraction |
| SST tube            | 8.5 ml       | Serum extraction          |
| <b>Total blood:</b> | 22.5ml       |                           |

- The whole blood sample (6ml) collected in the EDTA tube will be stored at -80°C, as indicated in Table 2.

**Table 2.** Volumes and use of EDTA whole blood sample.

| Whole blood aliquot no. | EDTA volume | Designated for the analysis of: |
|-------------------------|-------------|---------------------------------|
| 1                       | 6 ml        | HbA1c                           |

- The blood (8.5ml) collected in the SST tube will be left to separate at room temperature for 20 mins and then centrifuged at 3000 rpm for 10 min. The extracted (heparin) plasma will be pipetted into 4 aliquots of 1 ml (considering a 50% efficiency of centrifugation in plasma extraction). One aliquot of 1ml will be used for determining glucose, insulin, lipids, LFT and hsCRP, while the 3 aliquots of 1ml each will be stored at -80°C, as indicated in Table 3.

**Table 3.** Volumes and use of SST plasma aliquots.

| Plasma aliquot no. | EDTA plasma volume | Designated for the analysis of:      |
|--------------------|--------------------|--------------------------------------|
| 1                  | 1000 µl            | Glucose, insulin, lipids, LFT, hsCRP |
|                    |                    | <b>Designated for:</b>               |
| 2                  | 1000 µl            | Storage at -80°C                     |
| 3                  | 1000 µl            | Storage at -80°C                     |
| 4                  | 1000 µl            | Storage at -80°C                     |

- The blood (6 ml) collected in the heparin tube will be centrifuged at 3000 rpm for 10 min and the extracted plasma will be pipetted into 3 aliquots of 600 µl (considering a 50% efficiency of centrifugation in plasma extraction). One aliquot of 600 µl will be used for determining cytokine concentrations, while the remaining 3 aliquots of 500 µl each will be stored at -80°C, as indicated in Table 4.

**Table 4.** Volumes and use of heparin plasma aliquots.

| Plasma aliquot no. | Heparin plasma volume | Designated for the analysis of:                       |
|--------------------|-----------------------|-------------------------------------------------------|
| 1                  | 1ml                   | Cytokines (IL-1 $\beta$ , IL-6, IL-8, IL-10, and TNF) |
|                    |                       | <b>Designated for:</b>                                |
| 2                  | 1ml                   | Storage at -80°C                                      |
| 3                  | 1ml                   | Storage at -80°C                                      |
| 4                  | 1ml                   | Storage at -80°C                                      |

**NOTE:** It is essential that ONLY NON-HAZARDOUS waste be placed in the wastepaper/ general rubbish bins. Pipette tips should be disposed in sharps containers, whereas laboratory and associated waste directly involved in specimen processing (i.e blood collection tubes, gloves etc) must be disposed in biological waste bags.

#### 1.4 Blood storage

Eppendorf tubes or screw cap tubes must be clearly labelled with identification, media used and date, placed in a freezer well rack and should not be stored for long periods on a bench, but must be transferred with an ice esky box to a dedicated storage area (i.e. refrigerator, cold room or cupboard) as soon as possible.

Laboratory coats must be removed and hung up before leaving laboratory areas and should be laundered once a week. Hands must be washed with an antibacterial agent BEFORE leaving laboratory (Hibiclens/Microshield or equivalent, followed by extensive rinsing).



# Participant Information Sheet/Consent Form

Interventional study - Adult providing own consent

|                                                                    |                                                                                                                                                                                                                                                                                                                                                                                                                                                                                    |
|--------------------------------------------------------------------|------------------------------------------------------------------------------------------------------------------------------------------------------------------------------------------------------------------------------------------------------------------------------------------------------------------------------------------------------------------------------------------------------------------------------------------------------------------------------------|
| <b>Title</b>                                                       | Optimising outcomes for people with knee pain through food: FEAST randomised controlled trial                                                                                                                                                                                                                                                                                                                                                                                      |
| <b>Short Title</b>                                                 | The FEAST trial                                                                                                                                                                                                                                                                                                                                                                                                                                                                    |
| <b>Ethics Reference Number</b>                                     | HEC22044                                                                                                                                                                                                                                                                                                                                                                                                                                                                           |
| <b>Project Sponsor</b>                                             | La Trobe University                                                                                                                                                                                                                                                                                                                                                                                                                                                                |
| <b>Coordinating Principal Investigator/ Principal Investigator</b> | Dr Adam Culvenor (School of Allied Health, Human Services and Sport (SAHHSS), La Trobe University)                                                                                                                                                                                                                                                                                                                                                                                 |
| <b>Associate Investigator(s)</b>                                   | Dr Brooke Devlin (School of Human Movement and Nutrition Sciences, University of Queensland)<br>Prof. Peter Brukner (SAHHSS, La Trobe University)<br>Ass. Prof. Joanne Kemp (SAHHSS, La Trobe University)<br>Prof. Kay Crossley (SAHHSS, La Trobe University)<br>Dr Andrea Mosler (SAHHSS, La Trobe University)<br>Dr Josh Heerey (SAHHSS, La Trobe University)<br>Ms Lynette Law (PhD student, SAHHSS, La Trobe University)<br>Ms Amanda Attanayake (SAHHSS, La Trobe University) |
| <b>Location</b>                                                    | La Trobe University                                                                                                                                                                                                                                                                                                                                                                                                                                                                |

## Part 1 What does my participation involve?

### 1 Introduction

You are invited to take part in this research project because you have knee pain. This research project aims to assess the effectiveness of two different programs provided through advice and education by a qualified dietitian to improve your knee pain, function and quality of life.

This information sheet tells you about the research project. It explains the tests and treatments involved. Knowing what is involved will help you decide if you want to take part in the project. Please read this information carefully. Ask questions about anything that you don't understand or want to know more about. Before deciding whether or not to take part, you might want to talk about it with a relative, friend or your local doctor.

#### **Your participation is voluntary**

Participation in this research is completely voluntary and there will be no cost to you. If you don't wish to take part, you don't have to. If you decide you want to take part, you will be given a copy of this Participant Information Sheet and asked to sign the consent section. By signing it you are telling us that you:

- Understand what you have read
- Consent to take part in the research project
- Consent to have the tests and treatments that are described
- Consent to the use of your personal and health information as described.

You will be given a copy of this Participation Information Sheet and Consent Form to keep.

## 2 What is the purpose of this research?

As you may be aware, knee pain is very common and is often associated with knee osteoarthritis. Osteoarthritis is the most common form of arthritis and is a leading cause of disability in Australia. Currently, there is no cure for osteoarthritis, therefore it is important to investigate treatments that can improve the main symptoms associated with osteoarthritis: pain, swelling, stiffness and movement difficulties. We will recruit 140 adults who have knee pain.

This study is being conducted by researchers at La Trobe University and is partly funded by the National Health and Medical Research Council (NHMRC) of Australia and Dr Peter Brukner. All assessments and consultations will be at **no cost** to you.

## 3 Who can participate?

You can participate in this study if you meet all the following:

- Between 45-85 years of age and understand written and spoken English
- Activity-related knee pain on most days of the past month
- Knee pain for at least 3 months
- No morning knee stiffness, or morning stiffness that lasts less than 30mins
- Willing to complete the assigned 12-week eating program and attend all appointments (detailed below)

You are not eligible and cannot participate in this study if you meet any of the following:

- Knee pain not primarily due to osteoarthritis (e.g., fibromyalgia, referred pain)
- Bilateral knee replacement
- Already strictly following a specific diet (e.g., low-carb, paleo, Mediterranean, Vegan)
- Received treatment from a dietitian, or knee injection, in the past 3 months
- Experienced  $\geq 5$ kg weight loss in the past 3 months or body weight  $\geq 200$ kg
- Planning to have knee surgery in the next 6 months
- Pregnant or breastfeeding
- History of psychiatric or eating disorder (excluding anxiety/depression) or bariatric surgery

## 4 What does participation in this research involve?

This study will be conducted over 6 months in total (see flowchart on next page).

### ***Pre-baseline (online/phone) appointment***

You will be asked to attend a 30-minute Zoom/telephone appointment prior to your first face-to-face appointment. At this appointment, we will discuss the consent form, outline the fasting process needed to complete your blood test and DEXA scan, and answer any questions you might have. We will also explain how to complete a 3-day food diary, which will be done using a smart phone application or paper-based food diary (personal preference).

### ***Baseline (first) appointment***

This appointment will be arranged at a convenient time for you at La Trobe University, Bundoora and will take approximately 2 hours. You will be asked to not eat/drink anything or conduct any exercise in the morning of your appointment (i.e., fasting for 12-hours) for the purpose of a blood test. At the appointment, we will assess your:

- Height, weight, waist circumference and blood pressure
- Body composition measured via a Dual-energy X-ray Absorptiometry Scan (DEXA).  
This involves laying on the scanner bed for ~7 mins. The machine uses small doses (<1% yearly dose) of radiation to assess tissue density (how much muscle and adipose tissue you have). The total effective dose of radiation has been calculated by a Medical Physicist (see risks below). Light clothing with no metal (e.g., zips, clips, underwire) should be worn (gown provided if needed). All measures will be taken by trained

researchers who hold Victorian Government radiation licenses and comply to the Code of Practice set out by the Australian Radiation Protection and Nuclear Safety Agency.

- Blood test: A trained researcher qualified to take blood will collect a small amount of blood (~25 mL, equivalent to ~4 teaspoons) from a forearm vein to assess inflammation levels.
- Questionnaires assessing your pain, activity level and quality of life and food intake
- Functional tests: i) how many times you can stand from a chair in 30 secs; and ii) how fast you can walk 40 metres.

We will provide a snack/drink as soon as you complete the DEXA and blood tests.

### **Random assignment to one of two different treatments**

At the end of the first appointment at La Trobe University, you will be randomly assigned (50:50 chance, like a coin toss) to receive a program (from qualified dietitians) to either:

- minimise processed foods that are known to promote inflammation and optimise foods shown to reduce inflammation; or
- minimise foods that are known to be high in fat content.

This means neither you nor the researchers will be able to choose which group you are assigned to. We do not know which treatment is best; to find out we need to compare the two programs. Although the two programs involve modifying some types of food that you eat, you can eat as much as you like of these foods. **You do not need to restrict the amount of food that you eat.**

Irrespective of which group you are assigned to, you will receive specific education and advice from an Accredited Practising Dietitian (APD) in a dietary consultation at the start of the study (at the end of your first appointment at La Trobe University). Your dietitian will also work with you to develop a personalised management plan to support you throughout the study. You will be asked to follow the program for 12 weeks (but you can continue for as long as you like). We will ask you to record your food intake for 3 days at up to six different times throughout the study.

### **Support phone calls**

To support you throughout the study and answer any questions you have, we will arrange up to four follow-up consultations to be conducted over the phone/online during the 12 weeks. This phone call will take approximately 15-20 minutes. At these times, we will also ask you to complete some of the same questionnaires online (via a secure link provided by e-mail).

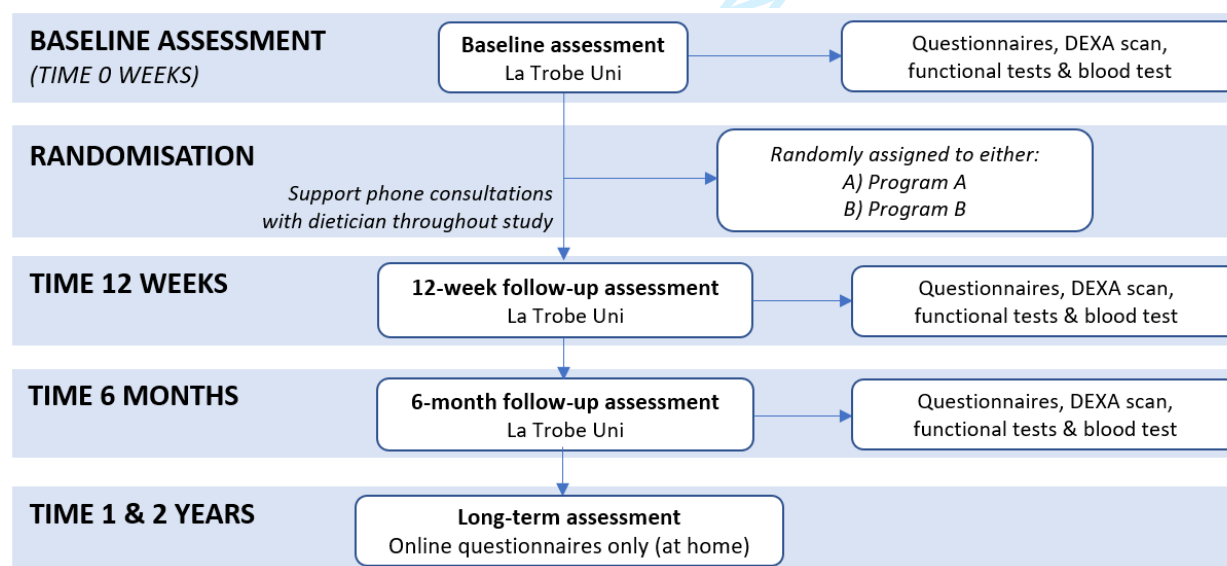

**Figure 1. Flowchart of study assessments**

### **Follow-up appointments**

So that we can assess the results of the program you have been assigned, we will ask you to return for face-to-face appointments at La Trobe University at **12 weeks and 6 months after your first appointment.** These follow-up appointments will be like the first appointment where



1 we will do all the same tests and questionnaires. You will need to fast (not eat/drink anything) the  
2 morning of your appointment for the blood test. You will have another dietary consultation with  
3 the study dietitian who will provide support for you to continue with the program you have been  
4 assigned. You should allow about 2 hours for these appointments. To assess longer-term results,  
5 we will ask you to complete the same online questionnaires at 1 and 2 years after your first  
6 appointment. The total time commitment for participating will be approximately 6-8 hours.  
7

8  
9 There are no additional costs associated with participating in this research project. All medical  
10 care and tests (i.e., dietitian consultations, DEXA scan, blood tests) required as part of the  
11 research project will be provided free of charge. The results of the DEXA scan and blood tests  
12 will not be used to diagnose health conditions, but only to evaluate the effects of the intervention.  
13 We will provide you with your individual results when the DEXA and blood analyses are completed  
14 at the end of the study. Your travel costs to attend the assessments will be reimbursed up to \$100.  
15

16  
17 At the end of the first 12 weeks, or after 6-12 months, we may also ask if you are willing to have  
18 a separate interview with one of the study researchers (this interview is optional and you can take  
19 part in the study without needing to complete the interview). The purpose of this interview is to  
20 seek feedback on the study treatments, satisfaction with the process received and whether there  
21 are any suggestions for improvement. The interview will take approximately 30 minutes, but you  
22 can cease the interview at any time. To ensure responses are correctly interpreted, responses to  
23 questions will be audio recorded and transcribed. Audio recording transcriptions will be completed  
24 by 'Transcription Australia' on their secure, encrypted Australian-based software. Although voice  
25 in your audio recording could lead to your identification, this file will not be used during analysis.  
26 Instead, a re-identifiable transcription, which you will have the opportunity to check for accuracy,  
27 will be used for analysis. Re-identifiable means that we will use a code number and not your name  
28 on data collected to ensure your anonymity. Following the completion of analysis of this  
29 transcription, the audio file associated with your interview will be deleted. After analysis, overall  
30 findings and conclusions from all interviews will also be sent to you, to allow an opportunity to  
31 make any further comments. We will seek around 40 participants to be interviewed. It is your  
32 decision or not whether you wish to be interviewed.  
33

## 34 35 **5 What are the alternatives to participation?**

36  
37 You do not have to take part in this research project to receive treatment for your knee. Other  
38 options are available; these include seeing a physiotherapist or dietitian (e.g., private or public  
39 health centre). The research team will discuss these options with you before you decide to take  
40 part in this project. You can also discuss the options with your doctor, dietitian or physiotherapist.  
41

## 42 43 **6 What are the possible benefits of taking part?**

44  
45 We cannot guarantee or promise that you will receive any benefits from this research. However,  
46 possible benefits may include improvement of pain, function, quality of life, physical activity, and  
47 confidence in your knee. You may gain valuable insight into how to manage your food intake and  
48 specific anti-inflammatory and low-fat foods, nutrients and eating habits. The expected benefit to  
49 society is the development of a drug-free and non-invasive treatment option to help manage pain  
50 and disability associated with osteoarthritis. This will give doctors and patients alternative ways  
51 to manage knee pain, which in turn may lead to improvements in the quality of life for patients.  
52  
53

## 54 55 **7 What are the possible risks and disadvantages of taking part?**

56  
57 With any medical treatment there are: (i) risks we know about; (ii) risks we don't know about; and  
58 (iii) risks we don't expect. We have listed the risks we know about below. You may have none,  
59 some or all the effects listed below, and they may be mild, moderate or severe. If you have any  
60 of these side effects, or are worried about them, talk with the study coordinator.

| Possible Side Effect                                                                      | How often is it likely to occur?                                                        | How severe might it be? | How long might it last?                       |
|-------------------------------------------------------------------------------------------|-----------------------------------------------------------------------------------------|-------------------------|-----------------------------------------------|
| <b>Emotional distress due to involvement in research and completion of questionnaires</b> | Rarely; although can occur when completing study questionnaires                         | Minimal                 | While completing the study questionnaires     |
| <b>Emotional distress due to diet assessment</b>                                          | Rarely; although can occur when assessing food intake prior to, or during, appointments | Minimal                 | While completing the food diary or assessment |
| <b>Discomfort due to body measurements</b>                                                | Can occur while measurements are done by your dietitian or researcher                   | Minimal<br>Mild         | During appointment only                       |
| <b>Discomfort due to blood test</b>                                                       | Rarely; while blood is being collected                                                  | Mild                    | Bruising or swelling may last 1-3 days        |
| <b>Exposure to ionising radiation</b>                                                     | 1x 7-minute scan at initial, 12-week and 6-month appointment                            | Minimal                 | Effect too small to measure                   |
| <b>Tiredness/change in bowel patterns with change in diet</b>                             | Any change in diet can make you feel tired or have different bowel patterns             | Minimal                 | 1-2 weeks                                     |
| <b>Contraction of COVID-19</b>                                                            | Can occur during the face-to-face assessments                                           | Minimal<br>Moderate     | 1-2 weeks                                     |

If you become upset or distressed because of your participation in the research, the study coordinator together with the qualified dietitian will assist you with appropriate support. We can also provide you information about services you can access to seek help for emotional distress.

#### **Risks associated with completing study questionnaires and diet assessment**

Completing questionnaires about your knee pain, function, quality of life and dietary intake may cause emotional distress. If you begin to feel upset or distressed when completing your questionnaires or dietary assessment, please let a member of the research team know. We will provide you with the appropriate support, including a document outlining services you can access to help with your emotional distress.

#### **Risks associated with blood test**

Having a blood sample taken may cause some discomfort or bruising. On very rare occasions, the blood vessel may swell, or blood may clot in the blood vessel, or the spot from which blood is taken could become inflamed. Some people may feel light-headed when having blood taken and may occasionally faint. Very rarely, there could be a minor infection or bleeding. A qualified person will take a very small amount of your blood (max 30mL each appointment (normal blood donation is 500mL)) using stringent infection control procedures. If you notice increased redness, swelling or other signs of infection in the days following your assessment, tell us immediately.

#### **Risks associated with eating low-inflammatory foods or low-fat foods**

As you adjust to the eating program you are assigned to, you may experience feelings of tiredness and/or changes in bowel habits and patterns. The researchers will assess your diet and ensure you are meeting your energy and nutrient needs throughout the study intervention. This eating program may be different than your normal diet and therefore influence your usual weekly shopping bill and expenses. As part of the consultations, you will be provided with some advice on how to follow the diet on a budget if required to ensure there is minimal financial burden.

#### **Exposure to ionising radiation**

If you choose to take part in this research, you will undergo three 7-minute DEXA scans (first, 12-week and 6-month assessments). DEXA scans are a non-invasive, fast and simple procedure. This research study involves exposure to a very small amount of radiation from a DEXA scan that you would not normally receive. As part of everyday living, everyone is exposed to naturally occurring background radiation and receives a dose of about 2 millisieverts (mSv) each year. The effective dose you will receive from all of these DEXA scans is approximately 0.03 mSv. At these



1 dose levels, no harmful effects of radiation have been demonstrated as any effect is too small to  
2 measure. The risk is believed to be minimal.  
3

4  
5 The scans we are taking are for research purposes and are not intended to be used like scans  
6 taken for a full clinical examination or to be used to help diagnose, treat or manage a particular  
7 condition. The whole-body DEXA scan may identify participants with a low bone mineral density.  
8 However, a whole body DEXA scan is not the established method for detecting low bone mineral  
9 density. Therefore, as a precaution if you are identified as having a low bone mineral density you  
10 will be encouraged to make an appointment with your General Practitioner to discuss the results.  
11

12 Have you been involved in any other research studies that involve radiation? If so, please tell us.  
13 Please keep information contained within this Patient Information Sheet about your exposure to  
14 radiation in this study, including the radiation dose, for at least 5 years. You will be required to  
15 provide this dose to researchers of any future research projects involving exposure to radiation.  
16

### 17 **Contraction of COVID-19**

18 You may be at risk of contracting COVID-19 during one of the face-to-face appointments at La  
19 Trobe University. Prior to attending La Trobe University, you will be screened for signs and  
20 symptoms of COVID-19 by a member of the research team. You will also need to be fully  
21 vaccinated (or hold a valid medical exemption) to be able to attend La Trobe University for your  
22 assessments. The research team will put in place the appropriate control measures to reduce the  
23 risk of COVID 19 transmission. The risk is believed to be minimal.  
24

## 25 **8 What if I withdraw from this research project?**

26  
27 You are under no obligation to continue with the research study. You may change your mind at  
28 any time about participating in the research. People withdraw from studies for various reasons,  
29 and you do not need to provide a reason.  
30

31  
32 You can withdraw from the study at any time by completing and signing the 'Participant  
33 Withdrawal of Consent Form'. This form is provided at the end of this document and is to be  
34 completed by you and supplied to the research team if you choose to withdraw at a later date.  
35

36  
37 If you withdraw from the study, you will be able to choose whether the study will destroy or retain  
38 the information it has collected about you. Information about you that has already been analysed  
39 (i.e., once you have been allocated to either program), may not be able to be destroyed to ensure  
40 accurate and unbiased study reporting. Personal details collected, such as your name and contact  
41 details, can be destroyed at any time upon study withdrawal.  
42

## 43 **9 What happens when the research project ends?**

44  
45 At the completion of the research project, you may continue to use the resources provided and to  
46 follow the eating program principles if you choose to. If requested, we will provide you with your  
47 individual results including your body composition (DEXA) assessment and whole study results.  
48 We, or other researchers, may also use coded information (so that you cannot be identified)  
49 collected for this research study in future related studies. If you consent (tick the box on the  
50 consent form) to be contacted for future related research, we will store your contact details (name,  
51 address, phone number, email) on the secure La Trobe University research drive, only accessible  
52 to members of the research team, and may contact you about future related research projects.  
53  
54  
55

## 56 **Part 2 How is the research project being conducted?**

### 57 **10 What will happen to information about me?**

1 By signing the consent form you agree to the relevant research staff collecting and using personal  
2 information about you for the research project. Any information obtained in connection with this  
3 research project that can identify you will remain confidential and securely stored. It will be  
4 disclosed only with your permission, or in compliance with the law.  
5

### 6 **Storage, retention and destruction**

7 The anonymity of your participation is assured with our procedure, in which a code number (not  
8 your name) will identify you. Data will be kept securely at La Trobe University in a locked filing  
9 cabinet and password protected research computer. Identifiable data will be stored for 15 years,  
10 then destroyed (electronic records deleted, paper-files shredded). Data will be strictly handled  
11 confidentially under guidelines set out by the National Health and Medical Research Council. The  
12 principal investigator (Dr Adam Culvenor) is responsible for maintaining this confidentiality.  
13

14  
15 In accordance with relevant Australian and/or Victorian privacy and other relevant laws, you have  
16 the right to request access to your information collected and stored by the research team. You  
17 also have the right to request that any information with which you disagree be corrected.  
18

19 The results of this project may be published and/or presented in a variety of forums and used by  
20 research students to obtain a research degree. In any publication, presentation or data files  
21 shared with other researchers, information will be provided in such a way that you cannot be  
22 identified, except with your permission.  
23

## 24 **11 Who is organising and funding the research?**

25  
26 This research project is being conducted by Dr Adam Culvenor and a team of researchers. It has  
27 been funded by the NHMRC (GNT2008523) and Dr Peter Brukner. Dr Peter Brukner is also an  
28 investigator on the project and has written a book and developed an app that will be used as part  
29 of the study. He will not be involved in data collection, analysis or the decision to publish results.  
30 No member of the research team will receive a personal financial benefit from your involvement  
31 in this research project (other than their ordinary wages).  
32

## 33 **12 Who has reviewed the research project?**

34  
35 All research in Australia involving humans is reviewed by an independent group of people called  
36 a Human Research Ethics Committee (HREC). The ethical aspects of this research project have  
37 been approved by the HREC of La Trobe University Human Ethics Committee.  
38

39 This project will be carried out according to the *National Statement on Ethical Conduct in Human*  
40 *Research (2018)*. This statement has been developed to protect the interests of people who agree  
41 to participate in human research studies.  
42

## 43 **13 Further information and who to contact**

44 For all enquiries, you can contact the Clinical Trial Manager, during business hours:  
45 Dr Adam Culvenor, Senior Research Fellow in Physiotherapy, La Trobe University  
46 Telephone: 03 9479 5116; E-mail: a.culvenor@latrobe.edu.au  
47

48 If you have any complaints about any aspect of the project, the way it is being conducted or any  
49 questions about being a research participant in general, then you may contact:  
50

51 Reviewing HREC: La Trobe University Human Research Ethics Committee  
52 Complaints Contact: Senior Human Ethics Officer, Ethics and Integrity, Research Office  
53 Telephone: 03 9479 1443 E-mail: humanethics@latrobe.edu.au  
54

55 \* Please quote the application reference number HEC22044  
56



## Consent Form - *Adult providing own consent*

**Title** Optimising outcomes for people with knee pain through food: FEAST randomised controlled trial

**Short Title** The FEAST trial

**Ethics Reference Number** HEC22044

**Project Sponsor** La Trobe University

**Coordinating Principal Investigator/  
Principal Investigator** Dr Adam Culvenor (La Trobe University)  
Dr Brooke Devlin (University of Queensland)  
Prof. Peter Brukner (La Trobe University)  
Ass. Prof. Joanne Kemp (La Trobe University)

**Associate Investigator(s)** Prof. Kay Crossley (La Trobe University)  
Dr Andrea Mosler (La Trobe University)  
Dr Josh Heerey (La Trobe University)  
Ms Lynette Law (PhD student, La Trobe University)  
Ms Amanda Attanayake (SAHHSS, La Trobe University)

**Location** La Trobe University

### Consent Agreement

I have read the Participant Information Sheet and I understand the purposes, procedures and risks of the research described in the project.

I understand that data files may be shared with other researchers, and that information will be provided in such a way that I cannot be identified, except with my permission.

I have had an opportunity to ask questions and I am satisfied with the answers I have received. I freely agree to participate in this research project as described and understand that I am free to withdraw at any time during the study without affecting my future health care.

I understand that, if I decide to discontinue the study treatment, I may be asked to attend follow-up visits to allow collection of information regarding my health status. I agree that data gathered for the study may be published provided my name or other identifying information is not used.

- I wish... /  do not wish... to receive results of the study
- I consent... /  do not consent... to be contacted for future related research
- I consent... /  do not consent... to have my interview responses audio-recorded/transcribed.
- I consent... /  do not consent... to have my samples/data used in future research

I understand that I will be given a signed copy of this document to keep.

Name of Participant (please print) \_\_\_\_\_

Signature \_\_\_\_\_ Date \_\_\_\_\_

### Declaration by Researcher<sup>†</sup>

I have given a verbal explanation of the research project, its procedures and risks and I believe that the participant has understood that explanation.

Name of Researcher<sup>†</sup> (please print) \_\_\_\_\_

Signature \_\_\_\_\_ Date \_\_\_\_\_

<sup>†</sup> An appropriately qualified member of the research team must provide the explanation of, and information concerning, the research project.



STANDARD PROTOCOL ITEMS: RECOMMENDATIONS FOR INTERVENTIONAL TRIALS

SPIRIT 2013 Checklist: Recommended items to address in a clinical trial protocol and related documents\*

| Section/item                                              | Item No | Description                                                                                                                                                                                                                                                                              |                         |
|-----------------------------------------------------------|---------|------------------------------------------------------------------------------------------------------------------------------------------------------------------------------------------------------------------------------------------------------------------------------------------|-------------------------|
| <b>Administrative information</b>                         |         |                                                                                                                                                                                                                                                                                          |                         |
| Title                                                     | 1       | Descriptive title identifying the study design, population, interventions, and, if applicable, trial acronym                                                                                                                                                                             | 1                       |
| Trial registration                                        | 2a      | Trial identifier and registry name. If not yet registered, name of intended registry                                                                                                                                                                                                     | 3                       |
|                                                           | 2b      | All items from the World Health Organization Trial Registration Data Set                                                                                                                                                                                                                 | ACTRN1262200<br>0440729 |
| Protocol version                                          | 3       | Date and version identifier                                                                                                                                                                                                                                                              | NA                      |
| Funding                                                   | 4       | Sources and types of financial, material, and other support                                                                                                                                                                                                                              | 21                      |
| Roles and responsibilities                                | 5a      | Names, affiliations, and roles of protocol contributors                                                                                                                                                                                                                                  | 21                      |
|                                                           | 5b      | Name and contact information for the trial sponsor                                                                                                                                                                                                                                       | 1                       |
|                                                           | 5c      | Role of study sponsor and funders, if any, in study design; collection, management, analysis, and interpretation of data; writing of the report; and the decision to submit the report for publication, including whether they will have ultimate authority over any of these activities | 21                      |
|                                                           | 5d      | Composition, roles, and responsibilities of the coordinating centre, steering committee, endpoint adjudication committee, data management team, and other individuals or groups overseeing the trial, if applicable (see Item 21a for data monitoring committee)                         | NA                      |
| <b>Introduction</b>                                       |         |                                                                                                                                                                                                                                                                                          |                         |
| Background and rationale                                  | 6a      | Description of research question and justification for undertaking the trial, including summary of relevant studies (published and unpublished) examining benefits and harms for each intervention                                                                                       | 4                       |
|                                                           | 6b      | Explanation for choice of comparators                                                                                                                                                                                                                                                    | 4-5                     |
| Objectives                                                | 7       | Specific objectives or hypotheses                                                                                                                                                                                                                                                        | 5                       |
| Trial design                                              | 8       | Description of trial design including type of trial (eg, parallel group, crossover, factorial, single group), allocation ratio, and framework (eg, superiority, equivalence, noninferiority, exploratory)                                                                                | 5                       |
| <b>Methods: Participants, interventions, and outcomes</b> |         |                                                                                                                                                                                                                                                                                          |                         |

|    |                      |     |                                                                                                                                                                                                                                                                                                                                                                                |                                     |
|----|----------------------|-----|--------------------------------------------------------------------------------------------------------------------------------------------------------------------------------------------------------------------------------------------------------------------------------------------------------------------------------------------------------------------------------|-------------------------------------|
| 1  |                      |     |                                                                                                                                                                                                                                                                                                                                                                                |                                     |
| 2  |                      |     |                                                                                                                                                                                                                                                                                                                                                                                |                                     |
| 3  |                      |     |                                                                                                                                                                                                                                                                                                                                                                                |                                     |
| 4  | Study setting        | 9   | Description of study settings (eg, community clinic, academic hospital) and list of countries where data will be collected. Reference to where list of study sites can be obtained                                                                                                                                                                                             | 5                                   |
| 5  |                      |     |                                                                                                                                                                                                                                                                                                                                                                                |                                     |
| 6  |                      |     |                                                                                                                                                                                                                                                                                                                                                                                |                                     |
| 7  | Eligibility criteria | 10  | Inclusion and exclusion criteria for participants. If applicable, eligibility criteria for study centres and individuals who will perform the interventions (eg, surgeons, psychotherapists)                                                                                                                                                                                   | 6-7                                 |
| 8  |                      |     |                                                                                                                                                                                                                                                                                                                                                                                |                                     |
| 9  |                      |     |                                                                                                                                                                                                                                                                                                                                                                                |                                     |
| 10 |                      |     |                                                                                                                                                                                                                                                                                                                                                                                |                                     |
| 11 | Interventions        | 11a | Interventions for each group with sufficient detail to allow replication, including how and when they will be administered                                                                                                                                                                                                                                                     | 8-13, Table 2, Supplementary File 1 |
| 12 |                      |     |                                                                                                                                                                                                                                                                                                                                                                                |                                     |
| 13 |                      |     |                                                                                                                                                                                                                                                                                                                                                                                |                                     |
| 14 |                      | 11b | Criteria for discontinuing or modifying allocated interventions for a given trial participant (eg, drug dose change in response to harms, participant request, or improving/worsening disease)                                                                                                                                                                                 | Table 2                             |
| 15 |                      |     |                                                                                                                                                                                                                                                                                                                                                                                |                                     |
| 16 |                      |     |                                                                                                                                                                                                                                                                                                                                                                                |                                     |
| 17 |                      |     |                                                                                                                                                                                                                                                                                                                                                                                |                                     |
| 18 |                      | 11c | Strategies to improve adherence to intervention protocols, and any procedures for monitoring adherence (eg, drug tablet return, laboratory tests)                                                                                                                                                                                                                              | 8-13, Table 2                       |
| 19 |                      |     |                                                                                                                                                                                                                                                                                                                                                                                |                                     |
| 20 |                      |     |                                                                                                                                                                                                                                                                                                                                                                                |                                     |
| 21 |                      | 11d | Relevant concomitant care and interventions that are permitted or prohibited during the trial                                                                                                                                                                                                                                                                                  | 13                                  |
| 22 |                      |     |                                                                                                                                                                                                                                                                                                                                                                                |                                     |
| 23 |                      |     |                                                                                                                                                                                                                                                                                                                                                                                |                                     |
| 24 | Outcomes             | 12  | Primary, secondary, and other outcomes, including the specific measurement variable (eg, systolic blood pressure), analysis metric (eg, change from baseline, final value, time to event), method of aggregation (eg, median, proportion), and time point for each outcome. Explanation of the clinical relevance of chosen efficacy and harm outcomes is strongly recommended | 13-18, Table 3                      |
| 25 |                      |     |                                                                                                                                                                                                                                                                                                                                                                                |                                     |
| 26 |                      |     |                                                                                                                                                                                                                                                                                                                                                                                |                                     |
| 27 |                      |     |                                                                                                                                                                                                                                                                                                                                                                                |                                     |
| 28 |                      |     |                                                                                                                                                                                                                                                                                                                                                                                |                                     |
| 29 |                      |     |                                                                                                                                                                                                                                                                                                                                                                                |                                     |
| 30 | Participant timeline | 13  | Time schedule of enrolment, interventions (including any run-ins and washouts), assessments, and visits for participants. A schematic diagram is highly recommended (see Figure)                                                                                                                                                                                               | Figure 1                            |
| 31 |                      |     |                                                                                                                                                                                                                                                                                                                                                                                |                                     |
| 32 |                      |     |                                                                                                                                                                                                                                                                                                                                                                                |                                     |
| 33 |                      |     |                                                                                                                                                                                                                                                                                                                                                                                |                                     |
| 34 | Sample size          | 14  | Estimated number of participants needed to achieve study objectives and how it was determined, including clinical and statistical assumptions supporting any sample size calculations                                                                                                                                                                                          | 19                                  |
| 35 |                      |     |                                                                                                                                                                                                                                                                                                                                                                                |                                     |
| 36 |                      |     |                                                                                                                                                                                                                                                                                                                                                                                |                                     |
| 37 |                      |     |                                                                                                                                                                                                                                                                                                                                                                                |                                     |
| 38 | Recruitment          | 15  | Strategies for achieving adequate participant enrolment to reach target sample size                                                                                                                                                                                                                                                                                            | 7                                   |
| 39 |                      |     |                                                                                                                                                                                                                                                                                                                                                                                |                                     |

#### Methods: Assignment of interventions (for controlled trials)

##### Allocation:

|    |                                  |     |                                                                                                                                                                                                                                                                                                                                                          |     |
|----|----------------------------------|-----|----------------------------------------------------------------------------------------------------------------------------------------------------------------------------------------------------------------------------------------------------------------------------------------------------------------------------------------------------------|-----|
| 43 |                                  |     |                                                                                                                                                                                                                                                                                                                                                          |     |
| 44 | Sequence generation              | 16a | Method of generating the allocation sequence (eg, computer-generated random numbers), and list of any factors for stratification. To reduce predictability of a random sequence, details of any planned restriction (eg, blocking) should be provided in a separate document that is unavailable to those who enrol participants or assign interventions | 7-8 |
| 45 |                                  |     |                                                                                                                                                                                                                                                                                                                                                          |     |
| 46 |                                  |     |                                                                                                                                                                                                                                                                                                                                                          |     |
| 47 |                                  |     |                                                                                                                                                                                                                                                                                                                                                          |     |
| 48 |                                  |     |                                                                                                                                                                                                                                                                                                                                                          |     |
| 49 |                                  |     |                                                                                                                                                                                                                                                                                                                                                          |     |
| 50 | Allocation concealment mechanism | 16b | Mechanism of implementing the allocation sequence (eg, central telephone; sequentially numbered, opaque, sealed envelopes), describing any steps to conceal the sequence until interventions are assigned                                                                                                                                                | 7-8 |
| 51 |                                  |     |                                                                                                                                                                                                                                                                                                                                                          |     |
| 52 |                                  |     |                                                                                                                                                                                                                                                                                                                                                          |     |
| 53 |                                  |     |                                                                                                                                                                                                                                                                                                                                                          |     |
| 54 |                                  |     |                                                                                                                                                                                                                                                                                                                                                          |     |
| 55 | Implementation                   | 16c | Who will generate the allocation sequence, who will enrol participants, and who will assign participants to interventions                                                                                                                                                                                                                                | 7-8 |
| 56 |                                  |     |                                                                                                                                                                                                                                                                                                                                                          |     |
| 57 | Blinding (masking)               | 17a | Who will be blinded after assignment to interventions (eg, trial participants, care providers, outcome assessors, data analysts), and how                                                                                                                                                                                                                | 7-8 |
| 58 |                                  |     |                                                                                                                                                                                                                                                                                                                                                          |     |
| 59 |                                  |     |                                                                                                                                                                                                                                                                                                                                                          |     |
| 60 |                                  |     |                                                                                                                                                                                                                                                                                                                                                          |     |

1  
2  
3  
4  
5  
6  
7  
8  
9  
10  
11  
12  
13  
14  
15  
16  
17  
18  
19  
20  
21  
22  
23  
24  
25  
26  
27  
28  
29  
30  
31  
32  
33  
34  
35  
36  
37  
38  
39  
40  
41  
42  
43  
44  
45  
46  
47  
48  
49  
50  
51  
52  
53  
54  
55  
56  
57  
58  
59  
60

|  |     |                                                                                                                                                      |    |
|--|-----|------------------------------------------------------------------------------------------------------------------------------------------------------|----|
|  | 17b | If blinded, circumstances under which unblinding is permissible, and procedure for revealing a participant's allocated intervention during the trial | NA |
|--|-----|------------------------------------------------------------------------------------------------------------------------------------------------------|----|

**Methods: Data collection, management, and analysis**

|                         |     |                                                                                                                                                                                                                                                                                                                                                                                                              |    |
|-------------------------|-----|--------------------------------------------------------------------------------------------------------------------------------------------------------------------------------------------------------------------------------------------------------------------------------------------------------------------------------------------------------------------------------------------------------------|----|
| Data collection methods | 18a | Plans for assessment and collection of outcome, baseline, and other trial data, including any related processes to promote data quality (eg, duplicate measurements, training of assessors) and a description of study instruments (eg, questionnaires, laboratory tests) along with their reliability and validity, if known. Reference to where data collection forms can be found, if not in the protocol | 13 |
|-------------------------|-----|--------------------------------------------------------------------------------------------------------------------------------------------------------------------------------------------------------------------------------------------------------------------------------------------------------------------------------------------------------------------------------------------------------------|----|

|  |     |                                                                                                                                                                                           |    |
|--|-----|-------------------------------------------------------------------------------------------------------------------------------------------------------------------------------------------|----|
|  | 18b | Plans to promote participant retention and complete follow-up, including list of any outcome data to be collected for participants who discontinue or deviate from intervention protocols | 13 |
|--|-----|-------------------------------------------------------------------------------------------------------------------------------------------------------------------------------------------|----|

|                 |    |                                                                                                                                                                                                                                                                   |    |
|-----------------|----|-------------------------------------------------------------------------------------------------------------------------------------------------------------------------------------------------------------------------------------------------------------------|----|
| Data management | 19 | Plans for data entry, coding, security, and storage, including any related processes to promote data quality (eg, double data entry; range checks for data values). Reference to where details of data management procedures can be found, if not in the protocol | 18 |
|-----------------|----|-------------------------------------------------------------------------------------------------------------------------------------------------------------------------------------------------------------------------------------------------------------------|----|

|                     |     |                                                                                                                                                                          |    |
|---------------------|-----|--------------------------------------------------------------------------------------------------------------------------------------------------------------------------|----|
| Statistical methods | 20a | Statistical methods for analysing primary and secondary outcomes. Reference to where other details of the statistical analysis plan can be found, if not in the protocol | 19 |
|---------------------|-----|--------------------------------------------------------------------------------------------------------------------------------------------------------------------------|----|

|  |     |                                                                          |    |
|--|-----|--------------------------------------------------------------------------|----|
|  | 20b | Methods for any additional analyses (eg, subgroup and adjusted analyses) | 19 |
|--|-----|--------------------------------------------------------------------------|----|

|  |     |                                                                                                                                                                                 |    |
|--|-----|---------------------------------------------------------------------------------------------------------------------------------------------------------------------------------|----|
|  | 20c | Definition of analysis population relating to protocol non-adherence (eg, as randomised analysis), and any statistical methods to handle missing data (eg, multiple imputation) | 19 |
|--|-----|---------------------------------------------------------------------------------------------------------------------------------------------------------------------------------|----|

**Methods: Monitoring**

|                 |     |                                                                                                                                                                                                                                                                                                                                       |    |
|-----------------|-----|---------------------------------------------------------------------------------------------------------------------------------------------------------------------------------------------------------------------------------------------------------------------------------------------------------------------------------------|----|
| Data monitoring | 21a | Composition of data monitoring committee (DMC); summary of its role and reporting structure; statement of whether it is independent from the sponsor and competing interests; and reference to where further details about its charter can be found, if not in the protocol. Alternatively, an explanation of why a DMC is not needed | 18 |
|-----------------|-----|---------------------------------------------------------------------------------------------------------------------------------------------------------------------------------------------------------------------------------------------------------------------------------------------------------------------------------------|----|

|  |     |                                                                                                                                                                         |       |
|--|-----|-------------------------------------------------------------------------------------------------------------------------------------------------------------------------|-------|
|  | 21b | Description of any interim analyses and stopping guidelines, including who will have access to these interim results and make the final decision to terminate the trial | 19-20 |
|--|-----|-------------------------------------------------------------------------------------------------------------------------------------------------------------------------|-------|

|       |    |                                                                                                                                                                                   |    |
|-------|----|-----------------------------------------------------------------------------------------------------------------------------------------------------------------------------------|----|
| Harms | 22 | Plans for collecting, assessing, reporting, and managing solicited and spontaneously reported adverse events and other unintended effects of trial interventions or trial conduct | 16 |
|-------|----|-----------------------------------------------------------------------------------------------------------------------------------------------------------------------------------|----|

|          |    |                                                                                                                                             |    |
|----------|----|---------------------------------------------------------------------------------------------------------------------------------------------|----|
| Auditing | 23 | Frequency and procedures for auditing trial conduct, if any, and whether the process will be independent from investigators and the sponsor | NA |
|----------|----|---------------------------------------------------------------------------------------------------------------------------------------------|----|

**Ethics and dissemination**

|                          |    |                                                                                           |    |
|--------------------------|----|-------------------------------------------------------------------------------------------|----|
| Research ethics approval | 24 | Plans for seeking research ethics committee/institutional review board (REC/IRB) approval | 20 |
|--------------------------|----|-------------------------------------------------------------------------------------------|----|

|    |                               |     |                                                                                                                                                                                                                                                                                     |                      |
|----|-------------------------------|-----|-------------------------------------------------------------------------------------------------------------------------------------------------------------------------------------------------------------------------------------------------------------------------------------|----------------------|
| 1  |                               |     |                                                                                                                                                                                                                                                                                     |                      |
| 2  |                               |     |                                                                                                                                                                                                                                                                                     |                      |
| 3  |                               |     |                                                                                                                                                                                                                                                                                     |                      |
| 4  | Protocol amendments           | 25  | Plans for communicating important protocol modifications (eg, changes to eligibility criteria, outcomes, analyses) to relevant parties (eg, investigators, REC/IRBs, trial participants, trial registries, journals, regulators)                                                    | 20                   |
| 5  |                               |     |                                                                                                                                                                                                                                                                                     |                      |
| 6  |                               |     |                                                                                                                                                                                                                                                                                     |                      |
| 7  |                               |     |                                                                                                                                                                                                                                                                                     |                      |
| 8  | Consent or assent             | 26a | Who will obtain informed consent or assent from potential trial participants or authorised surrogates, and how (see Item 32)                                                                                                                                                        | 20                   |
| 9  |                               |     |                                                                                                                                                                                                                                                                                     |                      |
| 10 |                               |     |                                                                                                                                                                                                                                                                                     |                      |
| 11 |                               | 26b | Additional consent provisions for collection and use of participant data and biological specimens in ancillary studies, if applicable                                                                                                                                               | NA                   |
| 12 |                               |     |                                                                                                                                                                                                                                                                                     |                      |
| 13 |                               |     |                                                                                                                                                                                                                                                                                     |                      |
| 14 | Confidentiality               | 27  | How personal information about potential and enrolled participants will be collected, shared, and maintained in order to protect confidentiality before, during, and after the trial                                                                                                | 18                   |
| 15 |                               |     |                                                                                                                                                                                                                                                                                     |                      |
| 16 |                               |     |                                                                                                                                                                                                                                                                                     |                      |
| 17 |                               |     |                                                                                                                                                                                                                                                                                     |                      |
| 18 | Declaration of interests      | 28  | Financial and other competing interests for principal investigators for the overall trial and each study site                                                                                                                                                                       | 21                   |
| 19 |                               |     |                                                                                                                                                                                                                                                                                     |                      |
| 20 | Access to data                | 29  | Statement of who will have access to the final trial dataset, and disclosure of contractual agreements that limit such access for investigators                                                                                                                                     | Supplementary File 1 |
| 21 |                               |     |                                                                                                                                                                                                                                                                                     |                      |
| 22 |                               |     |                                                                                                                                                                                                                                                                                     |                      |
| 23 |                               |     |                                                                                                                                                                                                                                                                                     |                      |
| 24 | Ancillary and post-trial care | 30  | Provisions, if any, for ancillary and post-trial care, and for compensation to those who suffer harm from trial participation                                                                                                                                                       | NA                   |
| 25 |                               |     |                                                                                                                                                                                                                                                                                     |                      |
| 26 | Dissemination policy          | 31a | Plans for investigators and sponsor to communicate trial results to participants, healthcare professionals, the public, and other relevant groups (eg, via publication, reporting in results databases, or other data sharing arrangements), including any publication restrictions | 20                   |
| 27 |                               |     |                                                                                                                                                                                                                                                                                     |                      |
| 28 |                               |     |                                                                                                                                                                                                                                                                                     |                      |
| 29 |                               |     |                                                                                                                                                                                                                                                                                     |                      |
| 30 |                               |     |                                                                                                                                                                                                                                                                                     |                      |
| 31 |                               |     |                                                                                                                                                                                                                                                                                     |                      |
| 32 |                               | 31b | Authorship eligibility guidelines and any intended use of professional writers                                                                                                                                                                                                      | NA                   |
| 33 |                               |     |                                                                                                                                                                                                                                                                                     |                      |
| 34 |                               |     |                                                                                                                                                                                                                                                                                     |                      |
| 35 |                               | 31c | Plans, if any, for granting public access to the full protocol, participant-level dataset, and statistical code                                                                                                                                                                     | NA                   |
| 36 |                               |     |                                                                                                                                                                                                                                                                                     |                      |
| 37 |                               |     |                                                                                                                                                                                                                                                                                     |                      |
| 38 | <b>Appendices</b>             |     |                                                                                                                                                                                                                                                                                     |                      |
| 39 | Informed consent materials    | 32  | Model consent form and other related documentation given to participants and authorised surrogates                                                                                                                                                                                  | Supplementary File 1 |
| 40 |                               |     |                                                                                                                                                                                                                                                                                     |                      |
| 41 |                               |     |                                                                                                                                                                                                                                                                                     |                      |
| 42 |                               |     |                                                                                                                                                                                                                                                                                     |                      |
| 43 | Biological specimens          | 33  | Plans for collection, laboratory evaluation, and storage of biological specimens for genetic or molecular analysis in the current trial and for future use in ancillary studies, if applicable                                                                                      | Supplementary File 2 |
| 44 |                               |     |                                                                                                                                                                                                                                                                                     |                      |
| 45 |                               |     |                                                                                                                                                                                                                                                                                     |                      |

\*It is strongly recommended that this checklist be read in conjunction with the SPIRIT 2013 Explanation & Elaboration for important clarification on the items. Amendments to the protocol should be tracked and dated. The SPIRIT checklist is copyrighted by the SPIRIT Group under the Creative Commons "[Attribution-Non Commercial-No Derivs 3.0 Unported](https://creativecommons.org/licenses/by-nc-nd/3.0/)" license.



# BMJ Open

## The effectiveness of an anti-inflammatory diet versus low-fat diet for knee osteoarthritis: the FEAST randomised controlled trial protocol

|                                 |                                                                                                                                                                                                                                                                                                                                                                                                                                                                                                                                                                                                                                                                                                                                                                                                                                                                                                                                                                                                                                                                                                                                         |
|---------------------------------|-----------------------------------------------------------------------------------------------------------------------------------------------------------------------------------------------------------------------------------------------------------------------------------------------------------------------------------------------------------------------------------------------------------------------------------------------------------------------------------------------------------------------------------------------------------------------------------------------------------------------------------------------------------------------------------------------------------------------------------------------------------------------------------------------------------------------------------------------------------------------------------------------------------------------------------------------------------------------------------------------------------------------------------------------------------------------------------------------------------------------------------------|
| Journal:                        | <i>BMJ Open</i>                                                                                                                                                                                                                                                                                                                                                                                                                                                                                                                                                                                                                                                                                                                                                                                                                                                                                                                                                                                                                                                                                                                         |
| Manuscript ID                   | bmjopen-2023-079374.R2                                                                                                                                                                                                                                                                                                                                                                                                                                                                                                                                                                                                                                                                                                                                                                                                                                                                                                                                                                                                                                                                                                                  |
| Article Type:                   | Protocol                                                                                                                                                                                                                                                                                                                                                                                                                                                                                                                                                                                                                                                                                                                                                                                                                                                                                                                                                                                                                                                                                                                                |
| Date Submitted by the Author:   | 04-Mar-2024                                                                                                                                                                                                                                                                                                                                                                                                                                                                                                                                                                                                                                                                                                                                                                                                                                                                                                                                                                                                                                                                                                                             |
| Complete List of Authors:       | Law, Lynette; La Trobe University, La Trobe Sport and Exercise Medicine Research Centre<br>Heerey, Joshua; La Trobe University, La Trobe Sport and Exercise Medicine Research Centre<br>Devlin, Brooke; University of Queensland, School of Human Movement and Nutrition Sciences<br>Brukner, Peter; La Trobe University, La Trobe Sport and Exercise Medicine Research Centre<br>Kemp, Joanne; La Trobe University, La Trobe Sport and Exercise Medicine Research Centre<br>Attanayake, Amanda; La Trobe University, La Trobe Sport and Exercise Medicine Research Centre<br>Hullet, Mark; La Trobe University, Department of Biochemistry and Chemistry, La Trobe Institute for Molecular Science<br>De Livera, Alysha; La Trobe University, Department of Mathematics and Statistics; The University of Melbourne, School of Population and Global Health<br>Mosler, Andrea; La Trobe University, La Trobe Sport and Exercise Medicine Research Centre<br>Morris, Hayden; Melbourne Knee Centre<br>White, Nathan; Melbourne Knee Centre<br>Culvenor, Adam; La Trobe University, La Trobe Sport and Exercise Medicine Research Centre |
| <b>Primary Subject Heading</b>: | Rheumatology                                                                                                                                                                                                                                                                                                                                                                                                                                                                                                                                                                                                                                                                                                                                                                                                                                                                                                                                                                                                                                                                                                                            |
| Secondary Subject Heading:      | Rehabilitation medicine                                                                                                                                                                                                                                                                                                                                                                                                                                                                                                                                                                                                                                                                                                                                                                                                                                                                                                                                                                                                                                                                                                                 |
| Keywords:                       | Knee < ORTHOPAEDIC & TRAUMA SURGERY, Chronic Disease, REHABILITATION MEDICINE, NUTRITION & DIETETICS                                                                                                                                                                                                                                                                                                                                                                                                                                                                                                                                                                                                                                                                                                                                                                                                                                                                                                                                                                                                                                    |
|                                 |                                                                                                                                                                                                                                                                                                                                                                                                                                                                                                                                                                                                                                                                                                                                                                                                                                                                                                                                                                                                                                                                                                                                         |

SCHOLARONE™  
Manuscripts

1  
2  
3  
4 1 **The effectiveness of an anti-inflammatory diet versus low-**  
5  
6 2 **fat diet for knee osteoarthritis: the FEAST randomised**  
7  
8  
9 3 **controlled trial protocol**  
10  
11 4

13 5 Lynette Law<sup>1</sup>, Joshua J Heerey<sup>1</sup>, Brooke L Devlin<sup>2</sup>, Peter Brukner<sup>1</sup>, Joanne L Kemp<sup>1</sup>, Amanda  
14 6 Attanayake<sup>1</sup>, Mark D Hulett<sup>3</sup>, Alysha De Livera<sup>4, 5, 6</sup>, Andrea B Mosler<sup>1</sup>, Hayden G Morris<sup>7</sup>,  
15 7 Nathan P White<sup>7</sup>, Adam G Culvenor<sup>1</sup>  
16  
17 8

- 19 9  
20 10  
21 11  
22 12  
23 13  
24 14  
25 15  
26 16  
27 17  
28 18  
29 19  
30 20  
31 21  
32 22  
33 23  
34 24  
35 25  
36 26  
37 27  
38 28  
39 29  
40 30  
41 31  
42 32  
43 33  
44 34  
45 35  
46 36  
47 37  
48 38  
49 39  
50 40  
51 41  
52 42  
53 43  
54 44  
55 45  
56 46  
57 47  
58 48  
59 49  
60 50
1. La Trobe Sport and Exercise Medicine Research Centre, School of Allied Health, Human Services and Sport, La Trobe University, Bundoora, Victoria, Australia
  2. School of Human Movement and Nutrition Sciences, University of Queensland, Brisbane, Australia
  3. Department of Biochemistry and Chemistry, La Trobe Institute for Molecular Science, La Trobe University, Bundoora, Victoria, Australia
  4. Department of Mathematics and Statistics, La Trobe University, Bundoora, Victoria, Australia
  5. School of Population and Global Health, The University of Melbourne, Victoria, Australia
  6. Baker Heart and Diabetes Research Institute, Melbourne, Victoria, Australia
  7. Melbourne Knee Centre, Melbourne, Victoria, Australia.

51 22 **Corresponding Author:**

52 23 Dr Adam Culvenor  
53 24 La Trobe Sport and Exercise Medicine Research Centre,  
54 25 La Trobe University,  
55 26 Kingsbury Drive, Bundoora, 3086, Victoria, Australia  
56 27 Phone: +61 9479 5116  
57 28 Email: a.culvenor@latrobe.edu.au

58 29 **Word count:** 3,998  
60

1  
2  
3  
4 30 **ABSTRACT**

5  
6 31 **Introduction:** Chronic inflammation plays a key role in knee osteoarthritis pathophysiology  
7  
8 32 and increases risk of comorbidities, yet most interventions do not typically target  
9  
10 33 inflammation. Our study will investigate if an anti-inflammatory dietary program is superior  
11  
12 34 to a standard care low-fat dietary program for improving knee pain, function and quality-of-  
13  
14 35 life in people with knee osteoarthritis.

15 36 **Methods and analysis:** The FEAST (eFEct of an Anti-inflammatory diet for knee oSTeoarthritis)  
16  
17 37 Study is a parallel-group, assessor-blinded, superiority randomised controlled trial. Following  
18  
19 38 baseline assessment, 144 participants aged 45-85 years with symptomatic knee osteoarthritis  
20  
21 39 will be randomly allocated to one of two treatment groups (1:1 ratio). Participants  
22  
23 40 randomised to the anti-inflammatory dietary program will receive six dietary consultations  
24  
25 41 over 12 weeks (2 in-person, 4 phone/videoconference) and additional educational and  
26  
27 42 behaviour change resources. The consultations and resources emphasise nutrient-dense  
28  
29 43 minimally processed anti-inflammatory foods and discourage pro-inflammatory processed  
30  
31 44 foods. Participants randomised to the standard care low-fat dietary program will receive  
32  
33 45 three dietary consultations over 12 weeks (2 in-person, 1 phone/videoconference) consisting  
34  
35 46 of healthy eating advice and education based on the Australian Dietary Guidelines, reflecting  
36  
37 47 usual care in Australia. Adherence will be assessed with 3-day food diaries. Outcomes are  
38  
39 48 assessed at 12 weeks and 6 months. The primary outcome will be change from baseline to 12  
40  
41 49 weeks in the mean score on four Knee injury and Osteoarthritis Outcome Score (KOOS<sub>4</sub>)  
42  
43 50 subscales: knee pain, symptoms, function in daily activities and knee-related quality-of-life.  
44  
45 51 Secondary outcomes include change in individual KOOS subscale scores, patient-perceived  
46  
47 52 improvement, health-related quality-of-life, body mass and composition using dual-energy X-  
48  
49 53 ray absorptiometry, inflammatory (high-sensitivity C-Reactive Protein, Interleukins, Tumour  
50  
51 54 Necrosis Factor- $\alpha$ ) and metabolic blood biomarkers (glucose, HbA1c, insulin, liver function,  
52  
53 55 lipids), lower-limb function and physical activity.

54  
55 56 **Ethics and Dissemination:** Approved by La Trobe University Human Ethics Committee. Results  
56  
57 57 will be presented in peer-reviewed journals and at international conferences.

58 58 **Trial registration:** ACTRN12622000440729  
59  
60

1  
2  
3 59 **Keywords:** Inflammation, Low-carbohydrate, Anti-inflammatory, Pain, Osteoarthritis, Knee,  
4  
5 60 Chronic disease, Rehabilitation, Diet  
6  
7

8 61  
9

10  
11 62 **STRENGTHS AND LIMITATIONS OF THIS STUDY**  
12

- 13  
14 63 • The anti-inflammatory dietary program was codeveloped and piloted with patients and  
15 64 clinicians, with the comparison low-fat dietary program representing usual care.  
16  
17  
18 65 • Sufficiently powered trial evaluating change from baseline to 12 weeks (primary endpoint)  
19 66 and 6 months facilitating longer-term effectiveness evaluation of the anti-inflammatory  
20 67 dietary program.  
21  
22  
23  
24 68 • This trial will evaluate both self-reported and objective outcomes to understand potential  
25 69 mechanisms of symptomatic changes.  
26  
27  
28  
29 70 • While outcome assessors are blinded to group allocation, the health professionals  
30 71 delivering the interventions and participants are unable to be blinded to group allocation  
31 72 due to the type of interventions.  
32  
33  
34  
35  
36  
37  
38  
39  
40  
41  
42  
43  
44  
45  
46  
47  
48  
49  
50  
51  
52  
53  
54  
55  
56  
57  
58  
59  
60

## 73 INTRODUCTION

74 Osteoarthritis (OA) is the most common rheumatic disease affecting approximately 15% of  
75 the population, with OA of the knee being most prevalent.(1, 2) Knee OA and its associated  
76 symptoms can be disabling and lead to substantial societal and healthcare costs.(3) In  
77 Australia alone, annual OA-related healthcare expenditure exceeds \$2.1 billion.(4) Although  
78 the main symptom of knee OA is pain, individuals with knee OA have an increased risk of  
79 other chronic diseases, including cardiovascular disease and diabetes.(5) As many as two-  
80 thirds of older adults with knee OA have more than one comorbidity.(6)

81  
82 Clinical guidelines for knee OA recommend exercise-therapy and weight-loss as first-line  
83 management strategies due to their excellent safety profile and therapeutic effects similar to  
84 commonly used analgesics.(3, 7) However, the effectiveness of exercise-therapy has recently  
85 been questioned due to its lack of benefit over an open-label placebo,(8) and findings that  
86 one-third of people completing an exercise program do not achieve a clinically meaningful  
87 improvement in pain.(9, 10) Weight-loss programs in those who are overweight or obese  
88 typically consist of caloric restrictive diets, which are challenging to adhere to and sustain.(11)  
89 A meta-analysis highlighted that, within two years of a calorie-restrictive program, over half  
90 of initial weight lost was regained, and by 5 years, this figure jumped to >80%.(12)

91  
92 Anti-inflammatory diets provide an alternative to calorie-restrictive approaches by targeting  
93 local and systemic inflammation, both contributors to OA disease onset, progression and  
94 symptom burden.(13-15) Anti-inflammatory diets are typically high in minimally processed,  
95 nutrient rich foods such as fruit, vegetables, spices and extra virgin olive oil, which are dense  
96 in nutrients such as polyphenols, carotenoids, fibre, monounsaturated and polyunsaturated  
97 fatty acids.(16-19) These nutrients can significantly reduce inflammation even in the absence  
98 of weight loss(20) via antioxidant and anti-inflammatory properties by neutralising free  
99 radicals and associated cell damage, as well as improved lipid profiles.(16, 17, 21) Omega-3  
100 fatty acids, abundant in nuts, seeds and fish, are also a key part of anti-inflammatory dietary  
101 approaches and help to achieve a more desirable omega-6 to omega-3 ratio.(22) In contrast,  
102 omega-6 fatty acids can be converted into arachidonic acid, a precursor for proinflammatory  
103 eicosanoids.(23) An elevated omega-6:omega-3 ratio exacerbates oxidative stress, which

1  
2  
3 104 increases the risk and severity of chronic disease, including OA.(15) Due to their focus on real  
4  
5 105 foods and consumption to satiety, anti-inflammatory diets are likely more sustainable than  
6  
7 106 traditional calorie-restrictive approaches.(17)  
8  
9 107

10  
11 108 Anti-inflammatory diets have garnered much interest in recent years due to their  
12  
13 109 effectiveness in alleviating symptoms and improving biomarkers for a variety of chronic  
14  
15 110 diseases, including diabetes,(18) cardiovascular disease,(24) epilepsy(25) and rheumatoid  
16  
17 111 arthritis.(26) Small studies investigating anti-inflammatory diets for knee OA have  
18  
19 112 demonstrated feasibility and effectiveness in reducing symptoms and inflammation over 12-  
20  
21 113 16 weeks.(15, 27, 28) To date, no fully powered randomised controlled trial (RCT) has  
22  
23 114 evaluated the effectiveness of an anti-inflammatory diet in knee OA.  
24

25 115  
26 116 The primary aim of this RCT is to estimate the average effect of an anti-inflammatory dietary  
27  
28 117 program compared to a standard care low-fat dietary program on knee-related pain, function  
29  
30 118 and quality of life in individuals with knee OA. We hypothesise that the anti-inflammatory  
31  
32 119 dietary program will result in greater improvements in knee-related pain, function and quality  
33  
34 120 of life after 12 weeks (primary endpoint) and 6 months (secondary endpoint) compared to  
35  
36 121 the standard care low-fat dietary program. Secondary aims are to assess 12-week and 6-  
37  
38 122 month effectiveness of the anti-inflammatory dietary program on: i) self-reported global  
39  
40 123 rating of change and achievement of acceptable symptoms; ii) health-related quality of life;  
41  
42 124 iii) body mass and composition using dual-energy X-ray absorptiometry (DXA); iv)  
43  
44 125 inflammatory and metabolic blood biomarkers, global lower-limb function and physical  
45  
46 126 activity.  
47

## 48 128 **METHODS AND ANALYSIS**

### 49 129 **Study Design**

50  
51  
52 130 This protocol describes a pragmatic, 2-arm, parallel-group assessor-blinded superiority RCT  
53  
54 131 and will be reported according to the Standard Protocol Items: Recommendations for  
55  
56 132 Interventional Trials (SPIRIT) statement.(29) Reporting of the completed RCT will conform to  
57  
58 133 the Consolidated Standards of Reporting Trials (CONSORT) statement.(30) The FEAST trial will  
59  
60 134 be conducted at a single site (La Trobe University) in Melbourne, Australia with the first

1  
2  
3 135 participant randomised on August 31, 2022 and the final participant anticipated to be  
4  
5 136 randomised in June 2024. The primary endpoint will be at 12 weeks, with additional follow-  
6  
7 137 up at 6 months (further longer-term follow-up dependent on funding). The study was  
8  
9 138 prospectively registered on the Australian and New Zealand Clinical Trial Registry (ACTRN  
10  
11 139 12622000440729).

12  
13  
14

### 141 **Patient and public involvement**

142 Participants and clinicians co-designed the anti-inflammatory intervention, research  
143 questions and study methods. This input was gained from: i) qualitative interviews with  
144 participants from the pilot study as part of formal process evaluation strategies;(28) ii)  
145 participant and clinician focus groups providing feedback on study recruitment material and  
146 participant handbooks; and iii) discussion with experienced clinicians managing knee OA and  
147 dietary intervention strategies as part of FEAST development. Patients and clinicians will  
148 provide input into the dissemination of study results by assisting with the decision on what  
149 information to share and in what format.

150

### 151 **Participants**

152 One hundred and forty adults 45-85 years old with chronic knee pain consistent with a clinical  
153 OA diagnosis using criteria from the National Institute for Health and Care Excellence, which  
154 does not require radiographic evidence,(31) will be enrolled (table 1).

155

156 **Table 1.** Eligibility criteria

| Inclusion criteria                                                                                                                                                                                                                                                                                                                                                     | Exclusion criteria                                                    |
|------------------------------------------------------------------------------------------------------------------------------------------------------------------------------------------------------------------------------------------------------------------------------------------------------------------------------------------------------------------------|-----------------------------------------------------------------------|
| Fulfil National Institute for Health and Care Excellence(31) clinical criteria for osteoarthritis:                                                                                                                                                                                                                                                                     | Another reason than OA for knee symptoms (e.g., tumour, fibromyalgia) |
| <ul style="list-style-type: none"> <li>• Activity-related joint pain with average knee pain severity <math>\geq 4</math> on 11-point numeric rating scale (NRS, where 0 = no pain, 10 = worst pain possible) in the past week;</li> <li>• No morning stiffness or morning stiffness <math>\leq 30</math> min; and</li> <li>• Age <math>\geq 45</math> years</li> </ul> |                                                                       |



|                                                                                                                              |                                                                                                                                                                               |
|------------------------------------------------------------------------------------------------------------------------------|-------------------------------------------------------------------------------------------------------------------------------------------------------------------------------|
| Age ≤85 years – due to potential safety reasons and additional co-morbidities that may hinder capacity for dietary adherence | Planning to have knee surgery in next 6 months                                                                                                                                |
| History of knee pain on most days of the past month                                                                          | Already strictly following an anti-inflammatory diet (e.g., low carbohydrate, high-fat, paleo, Mediterranean)                                                                 |
| History of knee pain for at least 3 months                                                                                   | Following a habitual diet that excludes animal products (e.g., vegan)                                                                                                         |
| Be willing and able to attend 3-4 phone consults and 12-week and 6-month follow-up assessments                               | Unable to follow anti-inflammatory diet (e.g., medically contraindicated, history of food allergy/hypersensitivity, family reasons)                                           |
| Able to understand written and spoken English, and to give informed consent                                                  | Taking the following diabetic medication that affects blood sugar levels (i.e., insulin, SGLT 2 inhibitors, sulfonylureas) to mitigate the risk of hypoglycaemia/ketoacidosis |
|                                                                                                                              | Contraindications for DXA scans (e.g., pregnant, breastfeeding, planning pregnancy in next 6 months, >200kg body weight)                                                      |
|                                                                                                                              | >5kg weight fluctuation in past 3 months (i.e., unstable weight)                                                                                                              |
|                                                                                                                              | Unable to understand written and spoken English                                                                                                                               |
|                                                                                                                              | Knee injection, injury or surgery in the past 3 months                                                                                                                        |
|                                                                                                                              | A diagnosed psychiatric disorder (excluding anxiety and depression)                                                                                                           |
|                                                                                                                              | History of eating disorder or bariatric surgery                                                                                                                               |
|                                                                                                                              | Had all eligible knee joints replaced by arthroplasty                                                                                                                         |

157 NRS, numeric rating scale; SGLT, sodium glucose co-transporter; DXA, dual-energy X-ray

158 absorptiometry

159

## 160 **Recruitment and screening procedure**

161 Trial flow is outlined in figure 1. Participants will be recruited from our network of  
 162 collaborating orthopaedic surgeons in Victoria, Australia. Consistent with our prior work in  
 163 other musculoskeletal conditions,(32, 33) potentially eligible participants (i.e., individuals  
 164 aged 45-85 years with a history of knee pain for which medical care was sought) will be sent  
 165 a study information letter inviting them to contact the research team. Additional recruitment

166 strategies will include advertisements in local newspapers, community/university  
167 magazines/posters, community market stalls and social media.

168

169 **\*\*\*FIGURE ONE HERE\*\*\*\*\***

170

171 Potential participants will be screened for eligibility via telephone. Once eligibility is  
172 confirmed, participants will attend a study orientation session via videoconference to explain  
173 further study details (e.g., fasting requirements) and be orientated to the dietary assessment  
174 tool (3-day food diary). If both knees meet the inclusion criteria, the most symptomatic knee  
175 will be considered as the index knee.

176

### 177 *Randomisation procedure, concealment of allocation and blinding*

178 Upon completion of baseline assessment, participants will be randomised to either the anti-  
179 inflammatory dietary program or standard care low-fat dietary program. Study treatments,  
180 but not study hypotheses, will be revealed to participants. A computer-generated  
181 randomisation schedule has been developed *a priori* by an independent statistician in random  
182 permuted blocks of 4-8 and stratified by sex and body mass index ( $\geq 30\text{kg}\cdot\text{m}^{-2}$  vs  $< 30\text{kg}\cdot\text{m}^{-2}$ ).  
183 To ensure concealed allocation, the randomisation schedule will be stored electronically in  
184 the secure Research Electronic Data Capture (REDCap®) system and only accessible to an  
185 unblinded researcher once baseline measures have been obtained, who will communicate  
186 treatment allocation to the participant. Investigators conducting the follow-up assessments  
187 will be blinded to group allocation. As the primary outcome is self-reported, participants are  
188 considered assessors; therefore, they will be blinded to previous scores. The health  
189 professionals delivering the interventions will deliver the intervention for both groups.  
190 Specific protocols for both interventions (including consultation contents and format, and  
191 accompanying resources) have been developed, and the health professionals have received  
192 training to ensure equal credibility. Random observations of intervention delivery will be  
193 conducted by the principal investigators to ensure treatment delivery credibility and fidelity.  
194 An independent statistician, blinded to group allocation, will perform the primary RCT  
195 analysis.

196

## 197 **Interventions**

198 The anti-inflammatory dietary program and standard care low-fat dietary program are  
199 summarised aligning to Template for Intervention Description and Replication (TIDieR)  
200 guidelines(34) (table 2). Participants in both intervention groups were not actively  
201 discouraged to lose weight, but weight loss was described as a potential outcome of the  
202 interventions. The same health professionals will deliver the intervention for both groups.

### 204 *Anti-inflammatory dietary program*

205 Participants allocated to the anti-inflammatory dietary program will receive specific anti-  
206 inflammatory dietary education and an individualised eating plan, as well as a suite of  
207 resources to support behaviour change. The anti-inflammatory dietary program will be  
208 delivered over 12 weeks by a qualified dietitian or by another health professional specially  
209 trained to deliver the intervention (e.g., physiotherapist).

210  
211 Participants will be encouraged to follow a diet containing minimally-processed foods and  
212 vegetable oils, and higher amounts of healthy fats and nutrient-dense wholefoods known to  
213 fight inflammation (e.g., fresh fruits low in natural sugar such as berries, non-starchy  
214 vegetables, nuts and seeds, seafood, poultry, red meat, eggs, full-fat dairy). Healthy fats  
215 include monounsaturated and polyunsaturated fats with optimal omega-3: omega-6 ratios as  
216 found in seafood, nuts, and extra-virgin olive oil. Participants will be advised to limit processed  
217 foods, refined carbohydrates (e.g., pasta, bread, rice), confectionary and foods with added  
218 sugar. Participants will be encouraged to consume a normocaloric diet and to eat to satiety,  
219 with no specific percentage of total energy intake targets for carbohydrate, fat or protein.

220  
221 An initial in-person consultation (~45 minutes) will occur immediately following group  
222 allocation to constructively review participant's current dietary intake (using baseline 3-day  
223 food diary) and develop an individualised meal plan. Participants will be provided with a  
224 comprehensive explanation of anti-inflammatory dietary principles, its rationale (e.g., the role  
225 of inflammation in OA, link between foods and inflammation) and its potential benefits and  
226 side-effects, and address questions and/or concerns. The following educational and  
227 behaviour change resources will also be provided at the initial consultation to support

1  
2  
3 228 adherence: i) bespoke information booklet providing anti-inflammatory eating information,  
4 229 example meal plans, and foods that are encouraged and foods to avoid (Supplementary file 1  
5 230 and 2); ii) complimentary subscription to an anti-inflammatory program (Defeat Diabetes  
6 231 phone app/website), providing anti-inflammatory recipes, masterclasses, meal plans and  
7 232 educational articles; iii) complimentary links to recommended documentaries exploring the  
8 233 benefits of anti-inflammatory nutrition (i.e., Fat Fiction, Cereal Killers, That Sugar Film); and  
9 234 iv) complimentary copy of a book exploring benefits of anti-inflammatory approach (A Fat Lot  
10 235 of Good(35)).  
11  
12  
13  
14  
15  
16  
17  
18  
19

20 237 Follow-up phone/videoconference consultations (~30 minutes) will be scheduled in weeks 2,  
21 238 4, 6, and 9, with timing to be negotiated between each participant and the health professional  
22 239 delivering the intervention. A final in-person consultation will be delivered immediately  
23 240 following the completion of the 12-week assessment. These follow-up consultations will  
24 241 provide participants with ongoing support, education and accountability. A 3-day food diary,  
25 242 completed prior to each consultation (see outcomes/adherence section), will guide  
26 243 individualised feedback and support to adapt meal plans to optimise adherence.  
27  
28  
29  
30  
31  
32  
33  
34  
35  
36  
37  
38  
39  
40  
41  
42  
43  
44  
45  
46  
47  
48  
49  
50  
51  
52  
53  
54  
55  
56  
57  
58  
59  
60

244 **Table 2:** Overview of intervention delivery described according to the TIDieR guidelines

| 1. BRIEF NAME        | Anti-inflammatory dietary program                                                                                                                                                                                                                                                                                                                                                                                                              | Standard care low-fat dietary program                                                                                                                                                                                                                                                  |
|----------------------|------------------------------------------------------------------------------------------------------------------------------------------------------------------------------------------------------------------------------------------------------------------------------------------------------------------------------------------------------------------------------------------------------------------------------------------------|----------------------------------------------------------------------------------------------------------------------------------------------------------------------------------------------------------------------------------------------------------------------------------------|
| 2. WHY               | Anti-inflammatory diets targeting systemic inflammation assist in the prevention and management of various chronic diseases.(16)<br>Small pilot studies have shown a positive effect of anti-inflammatory diets to improve knee-related symptoms in people with knee osteoarthritis.(28)                                                                                                                                                       | Healthy eating guidelines and dietary advice described in the standard care program booklet was based on Australian Dietary Guidelines (ADGs).(36, 37)<br><br>Two-three dietetic consultations represent usual care for patients referred for dietary management in Australia.(37, 38) |
| 3. WHAT (MATERIALS)  | Participants receive an intervention handbook containing all study details, key anti-inflammatory eating principles, example meal plans, traffic light system of foods encouraged and discouraged, and education (e.g., common myths, tips for eating out, shopping tips); complimentary access to the Defeat Diabetes program app/website; complimentary links to three movies; and a complimentary copy of the book “A Fat Lot of Good”.(35) | Participants receive an educational handbook emphasising ADGs healthy eating principles and are provided links to the online resources from the Eat for Health website ( <a href="https://www.eatforhealth.gov.au/">https://www.eatforhealth.gov.au/</a> ).                            |
| 4. WHAT (PROCEDURES) | Six consultations providing individualised guidance and support to follow an anti-inflammatory eating pattern, emphasising the consumption of fruits, non-starchy vegetables, fish, poultry, red meat, eggs, full-fat dairy, nuts, seeds, and extra virgin olive oil. Participants will be encouraged to avoid highly processed foods, refined carbohydrates, added sugar, and processed meats.                                                | Three consultations providing general advice and education regarding healthy eating based on the ADGs. The principles focus on consumption of foods from the five food groups, while limiting intake of foods containing saturated fat, added salt, added sugars and alcohol.          |
| 5. WHO PROVIDED      | A qualified dietitian or health professional specially trained to deliver all components.                                                                                                                                                                                                                                                                                                                                                      | A qualified dietitian or health professional specially trained to deliver all components.                                                                                                                                                                                              |
| 6. HOW               | Delivered with individual support for 12 weeks, after which, participants will be encouraged to sustain the anti-inflammatory diet unsupported up to 6 months. Consultations are one-to-one.                                                                                                                                                                                                                                                   | Delivered with standard healthy eating advice for 12 weeks, after which, participants will be encouraged to sustain the program unsupported up to 6 months. Consultations are one-to-one.                                                                                              |
| 7. WHERE             | In-person consultations will occur at La Trobe University Nutrition and Dietetics research laboratory. Additional                                                                                                                                                                                                                                                                                                                              | In-person consultations will occur at the La Trobe University Nutrition and Dietetics research                                                                                                                                                                                         |

|                               |                                                                                                                                                                                                                                                                                                                                                                                                     |                                                                                                                                                                                                                                                                                                                                                                                                   |
|-------------------------------|-----------------------------------------------------------------------------------------------------------------------------------------------------------------------------------------------------------------------------------------------------------------------------------------------------------------------------------------------------------------------------------------------------|---------------------------------------------------------------------------------------------------------------------------------------------------------------------------------------------------------------------------------------------------------------------------------------------------------------------------------------------------------------------------------------------------|
|                               | consultations will occur via telephone/videoconference (e.g., Zoom). Participants will integrate the diet principles into their daily consumption of foods and beverages.                                                                                                                                                                                                                           | laboratory. Additional consultations will occur via telephone/videoconference (e.g., Zoom). Participants will integrate the diet principles into their daily consumption of foods and beverages.                                                                                                                                                                                                  |
| <b>8. WHEN AND HOW MUCH</b>   | <p>Two in-person consultations at baseline (~45 mins) and week 12 (~30 mins)</p> <p>Four phone/videoconference follow-up consultations (~30 mins) in week 2, 4, 6, and 9.</p> <p><b>Total active intervention delivery time:</b> ~3.5 hours</p> <p>Participants are provided with self-management resources to optimise adherence to the anti-inflammatory diet up to the 6-month follow-up.</p>    | <p>Two in-person consultations at baseline (~45 mins) and week 12 (~30 mins)</p> <p>One phone/videoconference follow-up consultation (30 mins) in week 6.</p> <p><b>Total active control delivery time:</b> ~1.5 hours</p> <p>Participants encouraged to sustain their diet up to 6-month follow-up.</p>                                                                                          |
| <b>9. TAILORING</b>           | Individualised anti-inflammatory dietary advice, education, and support aligning with participant preferences and goals.                                                                                                                                                                                                                                                                            | Advice based on the ADGs.                                                                                                                                                                                                                                                                                                                                                                         |
| <b>10. MODIFICATIONS</b>      | Any modifications will be reported.                                                                                                                                                                                                                                                                                                                                                                 |                                                                                                                                                                                                                                                                                                                                                                                                   |
| <b>11. HOW WELL (planned)</b> | Two-three professionals (qualified dietitian and other health professional) receive prior training in how to deliver and supervise the program. Fidelity is assessed through random auditing by members of the principal investigator team (AC or BD). Participant adherence to the anti-inflammatory diet is assessed through consultation attendance, regular 3-day food diaries and self-report. | Two-three professionals (qualified dietitian and health professional) receive prior training in how to deliver and supervise the program. Fidelity is assessed through random auditing by members of the principal investigator team (AC or BD). Participant adherence to the standard care low-fat diet is assessed through consultation attendance, regular 3-day food diaries and self-report. |
| <b>12. HOW WELL (actual)</b>  | This will be reported in the primary paper.                                                                                                                                                                                                                                                                                                                                                         |                                                                                                                                                                                                                                                                                                                                                                                                   |

245 TIDieR, Template for Intervention Description and Replication; ADG, Australian Dietary Guidelines



1  
2 246 *Standard care low-fat dietary program*  
3  
4

5 247 Participants allocated to the standard care low-fat dietary program will receive advice and  
6  
7 248 education regarding healthy eating based on the Australian Dietary Guidelines.(39) These  
8  
9 249 government-endorsed guidelines aim to optimise nutrition intake through adequate  
10  
11 250 consumption of foods from the five core food groups (grains and cereals; fruit; vegetables and  
12  
13 251 legumes; lean meats and poultry, fish, eggs, and tofu; reduced fat dairy or alternatives), while  
14  
15 252 limiting intake of foods containing saturated fat, added salt, added sugars and alcohol. They are  
16  
17 253 high-carbohydrate and low-fat focused – participants will be encouraged to include at least four  
18  
19 254 serves of wholegrains daily (e.g., brown rice, pasta, bread, quinoa, oats) and to choose low-fat  
20  
21 255 protein and dairy foods where possible.  
22

23  
24  
25 257 The program will be delivered through individual consultations with the treating dietitian or other  
26  
27 258 specially trained health professional – the first in-person consultation immediately following  
28  
29 259 baseline assessment (~45 minutes), the second via phone/videoconference at 6 weeks (~30  
30  
31 260 minutes) and the third in-person at 12-week follow-up with timing individualised as required.  
32  
33 261 Two to three consultations represents usual care for patients referred for dietary management  
34  
35 262 in Australia through the current public healthcare (Medicare) rebate system.(37, 38) During the  
36  
37 263 initial in-person consultation, participants will be provided with a bespoke educational booklet  
38  
39 264 and advice and education emphasising the Australian Dietary Guideline principles  
40  
41 265 (<https://www.eatforhealth.gov.au/guidelines>) and informed of complementary and publicly  
42  
43 266 available online resources from the Eat for Health website (<https://www.eatforhealth.gov.au/>).  
44

45  
46 268 The follow-up phone/videoconference consultation in week-6 and in-person follow-up in week-  
47  
48 269 12 will provide participants with ongoing support, education and accountability. The 3-day food  
49  
50 270 diary, completed prior to each consultation (see outcomes/adherence section), will guide  
51  
52 271 feedback and support to adapt meal plans to optimise adherence. The treating health  
53  
54 272 professionals delivering the two dietary programs will be based centrally at La Trobe University  
55  
56 273 and will be trained by the senior study dietitian (BLD) until deemed competent in intervention  
57  
58 274 delivery.  
59

60 275

1  
2 276 Irrespective of group allocation, participants can continue usual medical care and consult with  
3  
4 277 their treating health professionals as necessary (e.g., general practitioner regarding medication  
5  
6 278 changes).

7 279

## 9 280 **Data collection procedure**

11 281 Data will be collected at baseline and 6 weeks, 12 weeks and 6 months after randomisation, with  
12  
13 282 12 weeks the *a priori* primary endpoint as this coincides with completion of supported  
14  
15 283 interventions (table 3). Where possible, data will be collected and managed using a secure web-  
16  
17 284 based software platform (REDCap®) hosted at La Trobe University,(40) which has equivalent  
18  
19 285 measurement properties to paper-based completion.(41) This strategy was used in our pilot  
20  
21 286 study(28) and other trials of musculoskeletal conditions.(42) Paper versions will also be available  
22  
23 287 if preferred.

24 288

## 26 289 **OUTCOMES**

### 28 290 **Baseline characteristics**

30 291 Participant characteristics including age, sex, ethnicity, knee pain/surgery details, socioeconomic  
31  
32 292 details (e.g., education level, employment status, living status), medical history and health  
33  
34 293 literacy (assessed with the Rapid Estimate of Adult Literacy in Medicine (REALM)(43)) will be  
35  
36 294 collected (table 3).

37 295

### 39 296 **Primary Outcome**

41 297 The primary outcome is the change from baseline to 12 weeks in the mean score on four Knee  
42  
43 298 injury and Osteoarthritis Outcome Score (KOOS<sub>4</sub>) subscales covering knee pain, symptoms,  
44  
45 299 function in daily activities and knee-related quality of life. The KOOS is a 42-item patient-reported  
46  
47 300 outcome measure assessing five separately scored subscales: Pain, Symptoms, Function in Sport  
48  
49 301 and Recreation (Sport/Rec), Activities of Daily Living (ADL), and Quality of Life. The KOOS<sub>4</sub> and all  
50  
51 302 KOOS subscale scores range from 0 (extreme problems) to 100 (no problems). The KOOS is a  
52  
53 303 valid, responsive and reliable questionnaire, with KOOS<sub>4</sub> a primary outcome for other knee OA  
54  
55 304 trials.(33, 44, 45)

56 305

57 306

58 307

59 308

309

310 **Table 3.** Overview of data collection

| Variable                                      | Baseline | 6 weeks | 12 weeks | 6 months |
|-----------------------------------------------|----------|---------|----------|----------|
| <b>Participant characteristics</b>            |          |         |          |          |
| Age                                           | X        |         |          |          |
| Sex                                           | X        |         |          |          |
| Ethnicity                                     | X        |         |          |          |
| Education level                               | X        |         |          |          |
| Health literacy (REALM)                       | X        |         |          |          |
| Employment status                             | X        |         |          |          |
| Smoking status                                | X        |         |          |          |
| Civil status, living situation                | X        |         |          |          |
| Medical history, comorbidities                | X        |         |          |          |
| Knee pain/injury/surgery history              | X        |         |          |          |
| <b>Objective Clinical Outcomes</b>            |          |         |          |          |
| Height, weight, waist girth                   | X        |         | X        | X        |
| 30-second chair stand test                    | X        |         | X        | X        |
| 40 metre walk test                            | X        |         | X        | X        |
| Body composition (DXA)                        | X        |         | X        | X        |
| Blood inflammatory and metabolic biomarkers   | X        |         | X        | X        |
| Blood pressure                                | X        |         | X        | X        |
| <b>Patient-reported Outcomes</b>              |          |         |          |          |
| KOOS subscales                                | X        | X       | X        | X        |
| Global rating of change                       |          | X       | X        | X        |
| Desire for knee surgery                       | X        | X       | X        | X        |
| Medication use                                | X        | X       | X        | X        |
| Knee pain (current and worst in past week)    | X        | X       | X        | X        |
| EQ-5D-5L <sup>^</sup>                         | X        | X       | X        | X        |
| Patient acceptable symptom state              | X        | X       | X        | X        |
| Brief Pain Inventory                          | X        |         | X        | X        |
| International Physical Activity Questionnaire | X        |         | X        | X        |
| Kessler Psychological Distress Scale (K10)    | X        |         | X        | X        |
| 3-day Food Diaries*                           | X        | X       | X        | X        |
| Adverse events                                |          | X       | X        | X        |

311 REALM, Rapid Estimate of Adult Literacy in Medicine; KOOS, Knee injury and Osteoarthritis Outcome  
 312 Score; DXA, Dual-Energy X-ray absorptiometry

1  
2 313 \*3-day food diaries are also assessed prior to anti-inflammatory dietary program consultations at 2, 4 and  
3 314 9 weeks

4  
5 315 ^Assesses health-related quality of life across 5 dimensions of health (mobility, self-care, usual activities,  
6 316 pain/discomfort, anxiety/depression) and a visual analogue scale (0-100) of current overall health status.

7 317

8

9 318

10

## 11 319 **Secondary effectiveness outcomes**

12

### 13 320 *KOOS subscales*

14

15 321 To allow for clinical in-depth interpretation, scores for the five KOOS subscales will be reported  
16 322 individually (i.e., pain, symptoms, function in sports and recreational activities, activities of daily  
17 323 living, quality of life).(10, 45)

18

19 324

20

### 21 325 *Global Rating of Change (GROC) and patient-acceptable state*

22

23 326 Self-perceived change in pain and function will be assessed using a 7-point Likert scale ranging  
24 327 from 'much worse' to 'much better' in response to the questions: "Overall, how has your knee  
25 328 pain changed since the start of the study?" and "Overall, how has your knee function changed  
26 329 since the start of the study?", respectively. Treatment success will be defined as a response of  
27 330 either 'better' or 'much better'. Satisfaction with current knee function using the self-reported  
28 331 Patient Acceptable Symptom State (PASS) question(46). Participants not satisfied with current  
29 332 knee function at follow-up assessments will be asked a second question to determine if they  
30 333 considered the treatment to have failed.(46)

31 334

32

33

### 34 335 *Anthropometrics*

35

36 336 Height and weight will be assessed using a seca 217 stadiometer and seca 703 EMR-validated  
37 337 column scale (Hammer Steindamm, Hamburg, Germany), respectively. Waist circumference will  
38 338 be measured using a metal tape measure (Lufkin W606PM ¼ inch x 2m Executive Thinline Pocket  
39 339 Tape).

40 340

41

42

### 43 341 *Global lower-limb function*

44

45 342 Two performance-based tests of lower-limb function recommended by the OA Research Society  
46 343 International (OARSI) will be conducted: the 30-second chair-stand test (number of chair-stands

47

48

49

50

51

52

53

54

1  
2 344 from a standardised height chair in 30 seconds) and 40-metre walk test (time to walk 40 metres  
3  
4 345 safely, using walking aids if required).(47)

5 346

7  
8 347 *Body composition*

9  
10 348 A whole-body DXA scan will be acquired using a Hologic Horizon® DXA scanner (Bedford, MA,  
11  
12 349 United States) to assess adiposity (visceral, peripheral) and lean mass.(48)

13  
14 350

16  
17 351 *Inflammatory and metabolic biomarkers*

18  
19 352 An array of blood inflammatory and metabolic biomarkers will be analysed from samples of blood  
20  
21 353 collected, including high sensitivity C-Reactive Protein (hsCRP), cytokines (IL-1 $\beta$ , IL-6, IL-8, IL-10,  
22  
23 354 TNF- $\alpha$ ), blood glucose, HbA1c, serum insulin, liver function tests (including albumin), and lipids  
24  
25 355 (e.g., high density lipoprotein, triglycerides). Participants will be instructed to fast for at least 10  
26  
27 356 hours prior to blood collection and a single forearm venepuncture will take place to collect a total  
28  
29 357 of  $\leq 30$  mL blood. Plasma and serum samples will be centrifuged (3000ms, 10 minutes), and all  
30  
31 358 samples (plasma, serum, and whole blood) frozen at -80°C for later analysis (Supplementary File  
32  
33 359 3).

34 360

35  
36 361 **Secondary safety outcomes**

37  
38 362 *Adverse events*

39  
40 363 Adverse events and serious adverse events will be recorded at 6-week, 12-week and 6-month  
41  
42 364 follow-up via open probe questioning to optimise collection of sufficient detail. Under the  
43  
44 365 Preferred Reporting Items for Systematic Reviews and Meta-Analyses (PRISMA) harms  
45  
46 366 statement, an adverse event is defined as any undesirable experience causing participants to  
47  
48 367 seek medical treatment (e.g., general practitioner).(49) A serious adverse event is defined as any  
49  
50 368 undesirable event/illness/injury classified as having the potential to significantly compromise  
51  
52 369 clinical outcome or result in significant disability or incapacity, those requiring inpatient or  
53  
54 370 outpatient hospital care, to be life-threatening or result in death.

55 371

56

57

58

59

60

## 372 **Exploratory outcomes**

### 373 *Dietary Analysis*

374 Participants will record food and beverage intake over three days via the smartphone application  
375 *Australia Calorie Counter - Easy Diet Diary* (Xyris Software Pty Ltd) or on paper (personal  
376 preference). Easy Diet Diary is a commercial calorie counter and food diary that allows users to  
377 email recorded diaries to treating professionals. Once received by the treating health  
378 professional, the 3-day food diaries will be imported into, and analysed using, Foodworks®  
379 Premium Edition nutrient analysis software (Version 10, Brisbane, Australia 2019) and Australian  
380 food composition databases. Paper-based 3-day food diaries will be manually entered into  
381 FoodWorks®. Total energy intake, macronutrients, micronutrients and core food group analysis  
382 will be reported. Dietary analysis data will also be used to calculate the inflammatory potential  
383 of participants' diets (e.g., Dietary Inflammatory Index).(50)

384

### 385 *Quality of life*

386 Health-related quality of life will be assessed with the EQ-5D-5L generic health index, which  
387 comprises five dimensions of health (mobility, self-care, usual activities, pain or discomfort,  
388 anxiety or depression) and a Visual Analogue Scale (VAS) of current overall health status.(51)  
389 Both validity and reliability has been demonstrated in arthritic populations.(52)

390

### 391 *Knee pain and interference*

392 Self-reported knee pain (current, worst over past week, average over past week) will be assessed  
393 using a 100mm VAS (0=no pain, 100=worst pain imaginable). The degree to which knee pain  
394 interferes with participant's daily functioning will be assessed using the Brief Pain Inventory,(53)  
395 a tool with reliability and validity demonstrated in knee pain populations.(54, 55)

396

### 397 *Change in analgesic medication use*

398 Change in analgesic medication use from baseline to 12-week and 6-month follow-up will be  
399 assessed with a 7-point Likert scale (much less to much more).

400



1  
2 401 *Physical activity*  
3

4 402 Physical activity will be assessed using the International Physical Activity Questionnaire  
5  
6 403 (IPAQ),(56) a standardised and valid questionnaire providing an estimate of physical activity and  
7  
8 404 sedentary behaviour, which has been widely validated.(56-58) Respondents are asked to report  
9  
10 405 time spent in physical activity across three intensities (walking, moderate, vigorous). Using the  
11  
12 406 IPAQ scoring protocol,(59) total weekly physical activity can be estimated by weighting time  
13  
14 407 spent in each activity intensity with its estimated metabolic equivalent (MET) energy  
15  
16 408 expenditure.(60)  
17

18  
19 410 *Blood pressure*  
20

21  
22 411 A pair of seated blood pressure measurements will be obtained using an automated monitor  
23  
24 412 (Omron Model HEM-7121). The blood pressure cuff is placed over the mid-upper arm with the  
25  
26 413 participant seated.  
27

28 414  
29 415 *Self-perceived wellness*  
30

31  
32 416 Self-reported sleep quality, hunger, fatigue and energy levels will be assessed using a 100mm  
33  
34 417 VAS (0=worst outcome, 100=best outcome).  
35

36 418  
37  
38 419 *Intervention adherence*  
39

40 420 Adherence will be assessed by a self-reported VAS (0=not at all adherent, 100=extremely  
41  
42 421 adherent) and 5-point Likert scale at 6 weeks, 12 weeks and 6 months and evaluation of 3-day  
43  
44 422 food diaries by consulting health professionals. Satisfactory adherence is defined as a self-report  
45  
46 423 of both  $\geq 80$  on the VAS and 'Most days' or 'Every day' on the Likert scale, at both the 6-week and  
47  
48 424 12-week timepoints.  
49

50 425 **DATA MANAGEMENT**  
51

52 426 Most outcome data will be collected and managed electronically via REDCap© web-based  
53  
54 427 software hosted at La Trobe University. Other data (e.g., DXA reports) will be stored electronically  
55  
56 428 on the La Trobe University secure research drive. All electronic data will be de-identified  
57  
58 429 (participant code) and exported for data analysis and saved in a password protected database on  
59  
60 430 the La Trobe University research drive only accessible to the research team. Paper-based  
431 identifying documents (e.g., consent forms) will be securely stored in a locked filing cabinet

1  
2 432 accessible only to members of the research team and separately from re-identifiable (i.e., coded)  
3  
4 433 data.

5 434  
6  
7 435 Due to the minimal known risks associated with the interventions being evaluated, our study will  
8  
9 436 not have a formal data monitoring committee and does not require an interim analysis. This is  
10  
11 437 the same approach we have taken with other low risk RCTs.(42) Any unexpected serious adverse  
12  
13 438 events or outcomes will be discussed by the trial management committee (authors of this  
14  
15 439 protocol) and reported to the approving human research ethics committee for monitoring.

16 440

### 18 441 **Sample size calculation**

20 442 This trial has been powered to detect a clinically significant between-group difference for the  
21  
22 443 primary outcome of KOOS<sub>4</sub>. A recent RCT comparing an anti-inflammatory diet vs low-caloric diet  
23  
24 444 in overweight women with knee OA observed an effect size (standardised mean difference) on  
25  
26 445 self-reported pain and function of 1.0 (95% confidence interval 0.5 to 1.6).(61) Given inherent  
27  
28 446 differences in the FEAST RCT (e.g., Australian Dietary Guideline control group, not specifically  
29  
30 447 targeting overweight participants, inclusion of both women and men), we used the lower bound  
31  
32 448 95% confidence interval to provide a conservative estimate of the anticipated effect size (0.5).  
33  
34 449 This estimated effect size is also a conservative estimate based on our single-arm anti-  
35  
36 450 inflammatory diet pilot trial, which had an effect size of 0.68.(28) Recruiting 128 participants  
37  
38 451 (equally distributed between two arms) would yield 80% power to observe such an effect or  
39  
40 452 larger at a two-tailed Type I error of 0.05. This sample size estimation is also conservative since  
41  
42 453 it is based on independent samples t-test. Using an ANCOVA model that includes the baseline  
43  
44 454 value as a covariate and is pre-specified for the analysis should provide higher power for the  
45  
46 455 same sample size.(62) To account for a potential 10% drop-out, we will recruit 144 participants.  
47  
48 456 This sample size will also be sufficient to detect a minimal important change (MIC) in KOOS<sub>4</sub>  
49  
50 457 estimated at 10 points in patients with knee OA (with a common between-subject standard  
51  
52 458 deviation of 15).(63)

51 459

### 53 460 **Statistical analyses**

55 461 Analysis will be performed according to the Estimands Framework(64) with a statistical analyst  
56  
57 462 blinded to group allocation. All outcomes and analyses are prospectively categorised as primary,  
58  
59 463 secondary or exploratory. For the primary hypothesis, a linear model with baseline value, sex and  
60  
61 464 BMI ( $\geq 30$  vs  $< 30 \text{ kg.m}^{-2}$ ) as covariates and treatment condition as a fixed factor will evaluate the

1  
2 465 treatment effect on the primary outcome of KOOS<sub>4</sub> (mean score of four of the five subscales of  
3  
4 466 the KOOS) at 12 weeks. A linear mixed model utilising repeated measures at all time-points for  
5  
6 467 secondary hypotheses will allow non-biased estimates of treatment effect in the presence of any  
7  
8 468 potential missing cases, providing data are missing at random. A sensitivity analysis using pattern-  
9  
10 469 mixture model to investigate the deviation from the missingness-at-random assumption will be  
11  
12 470 carried out.<sup>(65)</sup> For secondary binary outcomes (e.g., treatment success), mixed-effect logistic  
13  
14 471 regression models will be used to assess the effect of treatment. A subsequent analysis of  
15  
16 472 participants classified as adherent to the protocol will be performed. Following publication of the  
17  
18 473 primary trial results, we will also perform a formal mediation analysis to estimate direct and  
19  
20 474 indirect (e.g., through weight and inflammation change) effects.

### 21 475

### 22 476 **Healthcare resource use**

23  
24 477 Healthcare resource utilisation (e.g., hospitalisations, medical imaging, healthcare visits,  
25  
26 478 medication use) will be assessed by participant self-report to estimate costs associated with the  
27  
28 479 trial programs (e.g., hospital admissions, medication use, clinician visits, imaging tests, out-of-  
29  
30 480 pocket expenses).

### 31 481

### 32 482 **Process Evaluation**

33  
34 483 Semi-structured interviews will be conducted on a subset of consenting participants (until data  
35  
36 484 saturation reached) at 6 months. Interviews will explore experiences, knowledge and  
37  
38 485 understanding of interventions received including potential benefits; acceptability and perceived  
39  
40 486 effectiveness of the intervention; and reasons for adhering (or not) to the allocated diet.  
41  
42 487 Purposive sampling will be used to recruit interview participants based upon characteristics (anti-  
43  
44 488 inflammatory dietary program vs standard care low-fat dietary program, men vs women) and  
45  
46 489 outcomes of the trial (good outcome vs poor outcome). Interviews will be audio recorded,  
47  
48 490 transcribed and analysed using Framework Analysis,<sup>(66)</sup> a flexible technique allowing  
49  
50 491 researchers to identify, compare and contrast data according to inductively- and deductively-  
51  
52 492 derived themes. Data will be coded and an inductive thematic analysis will be applied until no  
53  
54 493 new themes emerge.

### 55 494

### 56 495 **ETHICS AND DISSEMINATION**

57  
58 496 This study complies with the Declaration of Helsinki and has received approval from La Trobe  
59  
60 497 University Human Ethics Committee (HEC-22044). Written informed consent will be obtained

1  
2 498 from participants prior to enrolment (Supplementary File 4). Anti-inflammatory diets are  
3  
4 499 associated with minimal and transient adverse events, thus there are minimal safety  
5  
6 500 considerations associated with this trial.

7 501  
8  
9 502 Study outcomes will be widely disseminated through a variety of sources. Results will be reported  
10  
11 503 in peer-reviewed publications and presented at key national and international conferences. Only  
12  
13 504 aggregate data will be reported. A lay summary report will be available for study participants.  
14  
15 505 Any important protocol amendments will be reported to the approving ethics committee,  
16  
17 506 registered at ANZCTR and communicated in the primary RCT paper. Any serious adverse events  
18  
19 507 will be recorded and reported to the approving ethics committee.

20 508  
21  
22 509 Deidentified data will be made available upon reasonable request to the principal investigator  
23  
24 510 (AGC) after publication (except where the sharing of data is prevented by privacy, confidentiality,  
25  
26 511 or other ethical matters, or other contractual or legal obligations) according to La Trobe  
27  
28 512 University Research Data Management Policy.

29 513

## 30 31 514 **DISCUSSION**

32  
33 515 The current RCT will be the first full-scale trial to evaluate the symptomatic, inflammatory,  
34  
35 516 functional and body composition benefits of an anti-inflammatory dietary program compared to  
36  
37 517 a standard care low-fat dietary program based on Australian Dietary Guidelines. While outcome  
38  
39 518 assessors are blinded to group allocation, owing to the type of interventions (i.e., dietary advice)  
40  
41 519 blinding of participants will not be possible. We also acknowledge that, like most RCTs, there is a  
42  
43 520 risk that our recruitment strategy may result in a selected sample not representative of the  
44  
45 521 general population. However, using similar recruitment strategies, our prior RCTs have resulted  
46  
47 522 in a representative sample of the culturally and sociodemographically diverse Australian  
48  
49 523 population that has similar characteristics to other international cohorts with the index  
50  
51 524 musculoskeletal condition.(67)

51 525

52  
53 526 The evaluation of a non-pharmacological anti-inflammatory dietary program to improve pain,  
54  
55 527 symptoms, and quality of life for individuals with OA could have important individual and socio-  
56  
57 528 economic benefits – decreased healthcare dollars spent on managing OA and reduced surgery  
58  
59 529 waiting lists. Another benefit is that anti-inflammatory diets are also effective at combating  
60  
530 metabolic syndrome, a key risk factor for chronic diseases, and thus the benefits from treating  
531  
532 531 OA could stretch further to improving other medical co-morbidities.(68) This fully-powered RCT

1  
2 532 represents a crucial step towards the development of a sustainable and cost-effective therapy  
3  
4 533 that can both supplement and complement existing treatment strategies to optimise OA  
5  
6 534 outcomes.

#### 7 535 8 9 536 10 **AUTHOR CONTRIBUTIONS**

11 537  
12 538 AGC, BLD, PB and JLK conceived the study and obtained funding. AGC, BLD, PB, and JLK designed  
13  
14 539 the study protocol with input from LL, JJH and ABM. ADL provided statistical expertise and will  
15  
16 540 conduct primary statistical analysis. MDH provided blood analysis expertise and will lead  
17  
18 541 inflammatory and metabolic marker analyses. HGM and NPW assisted with participant  
19  
20 542 recruitment from their clinical population with knee osteoarthritis. LL drafted the manuscript  
21  
22 543 with input from AGC, JJH, BLD, PB, JLK, AA, MDH, ADL, ABM, HGM and NPW. All authors and read  
23  
24 544 and approved the final manuscript.

#### 25 545 26 27 **FUNDING**

28  
29 547 This trial is supported by the National Health and Medical Research Council (NHMRC) of Australia  
30  
31 548 through an Investigator Grant held by AGC (GNT2008523), an Investigator Grant held by JLK  
32  
33 549 (APP2017844), and a philanthropic donation from PB.

#### 34 550 35 36 **COMPETING INTERESTS STATEMENT**

37  
38 552 PB is the founder of Defeat Diabetes and author of "A Fat Lot of Good". PB contributed to study  
39  
40 553 design but has no role in study execution, data management, analysis or the decision to publish.  
41  
42 554 The NHMRC has no role in study design and will not have any role in its execution, data  
43  
44 555 management, analysis and interpretation or on the decision to submit the results for publication.  
45  
46 556 JLK is an editor of the British Journal of Sports Medicine (British Medical Journal Group). AGC is  
47  
48 557 an associate editor of British Journal of Sports Medicine (British Medical Journal Group). All other  
49  
50 558 authors have no competing interests.

#### 51 559 52 53 **ACKNOWLEDGEMENTS**

54 561 We thank La Trobe University Medical Centre for assistance with blood collection, La Trobe  
55  
56 562 Nutrition and Dietetics department for the use of the nutrition lab and DXA scanner, and  
57  
58 563 Melbourne Pathology for providing pathology collection kits and analysis of biomarkers from  
59  
60 564 blood specimens.

565

## FIGURE LEGENDS

**Figure 1.** Flow of participants through the trial. DXA, Dual X-ray Absorptiometry; KOOS, Knee injury and Osteoarthritis Outcome Score

\*Optional qualitative interview for process evaluation at 6 months

## SUPPLEMENTARY FILES

**Supplementary File 1.** Sample of the standard care low fat dietary program participant booklet

**Supplementary File 2.** Sample of the anti-inflammatory dietary program participant booklet

**Supplementary File 3.** Standard Operating Procedures for blood collection, processing and storage

**Supplementary File 4.** Patient information and consent form

## REFERENCES

1. Cui A, Li H, Wang D, Zhong J, Chen Y, Lu H. Global, regional prevalence, incidence and risk factors of knee osteoarthritis in population-based studies. *EClinicalMedicine*. 2020;29-30:100587.
2. Duong V, Oo WM, Ding C, Culvenor AG, Hunter DJ. Evaluation and treatment of knee pain. *JAMA*. 2023;330:1568-80.
3. Weng Q, Goh S-L, Wu J, Persson MSM, Wei J, Sarmanova A, et al. Comparative efficacy of exercise therapy and oral non-steroidal anti-inflammatory drugs and paracetamol for knee or hip osteoarthritis: a network meta-analysis of randomised controlled trials. *British Journal of Sports Medicine*. 2023;bjsports-2022-105898.
4. Ackerman I, Bohensky M, Pratt C, Gorelik A, Liew D. Counting the Cost: Part 1 Healthcare costs. The current and future burden of arthritis2016.
5. Williams A, Kamper SJ, Wiggers JH, O'Brien KM, Lee H, Wolfenden L, et al. Musculoskeletal conditions may increase the risk of chronic disease: a systematic review and meta-analysis of cohort studies. *BMC Med*. 2018;16(1):167.
6. Pihl K, Roos EM, Taylor RS, Grønne DT, Skou ST. Associations between comorbidities and immediate and one-year outcomes following supervised exercise therapy and patient education - A cohort study of 24,513 individuals with knee or hip osteoarthritis. *Osteoarthritis Cartilage*. 2021;29(1):39-49.
7. Juhl C, Christensen R, Roos EM, Zhang W, Lund H. Impact of exercise type and dose on pain and disability in knee osteoarthritis: a systematic review and meta-regression analysis of randomized controlled trials. *Arthritis Rheumatol*. 2014;66(3):622-36.
8. Henriksen M, Hansen JB, Klokke L, Bliddal H, Christensen R. Comparable effects of exercise and analgesics for pain secondary to knee osteoarthritis: a meta-analysis of trials included in Cochrane systematic reviews. *J Comp Eff Res*. 2016;5(4):417-31.
9. Barton CJ, Kemp JL, Roos EM, Skou ST, Dundules K, Pazzinatto MF, et al. Program evaluation of GLA:D® Australia: Physiotherapist training outcomes and effectiveness of implementation for people with knee osteoarthritis. *Osteoarthritis and Cartilage Open*. 2021;3(3):100175.
10. Roos EM, Grønne DT, Skou ST, Zywił MG, McGlasson R, Barton CJ, et al. Immediate outcomes following the GLA:D® program in Denmark, Canada and Australia. A longitudinal analysis including 28,370 patients with symptomatic knee or hip osteoarthritis. *Osteoarthritis Cartilage*. 2021;29(4):502-6.



- 1  
2 609 11. Das SK, Gilhooly CH, Golden JK, Pittas AG, Fuss PJ, Cheatham RA, et al. Long-term effects of 2  
3 610 energy-restricted diets differing in glycemic load on dietary adherence, body composition, and  
4 611 metabolism in CALERIE: a 1-y randomized controlled trial. *Am J Clin Nutr.* 2007;85(4):1023-30.
- 5 612 12. Hall KD, Kahan S. Maintenance of Lost Weight and Long-Term Management of Obesity. *Med Clin*  
6 613 *North Am.* 2018;102(1):183-97.
- 7 614 13. Ansari MY, Ahmad N, Haqqi TM. Oxidative stress and inflammation in osteoarthritis  
8 615 pathogenesis: Role of polyphenols. *Biomed Pharmacother.* 2020;129:110452.
- 9 616 14. Goldring MB, Otero M. Inflammation in osteoarthritis. *Curr Opin Rheumatol.* 2011;23(5):471-8.
- 10 617 15. Strath LJ, Jones CD, Philip George A, Lukens SL, Morrison SA, Soleymani T, et al. The Effect of  
11 618 Low-Carbohydrate and Low-Fat Diets on Pain in Individuals with Knee Osteoarthritis. *Pain Med.*  
12 619 2020;21(1):150-60.
- 13 620 16. Galbete C, Kröger J, Jannasch F, Iqbal K, Schwingshackl L, Schwedhelm C, et al. Nordic diet,  
14 621 Mediterranean diet, and the risk of chronic diseases: the EPIC-Potsdam study. *BMC Medicine.*  
15 622 2018;16(1):99.
- 16 623 17. Simopoulos AP. The importance of the ratio of omega-6/omega-3 essential fatty acids. *Biomed*  
17 624 *Pharmacother.* 2002;56(8):365-79.
- 18 625 18. Esposito K, Maiorino MI, Bellastella G, Chiodini P, Panagiotakos D, Giugliano D. A journey into a  
19 626 Mediterranean diet and type 2 diabetes: a systematic review with meta-analyses. *BMJ Open.*  
20 627 2015;5(8):e008222.
- 21 628 19. Hussain T, Tan B, Yin Y, Blachier F, Tossou MC, Rahu N. Oxidative Stress and Inflammation: What  
22 629 Polyphenols Can Do for Us? *Oxid Med Cell Longev.* 2016;2016:7432797.
- 23 630 20. Neale EP, Batterham MJ, Tapsell LC. Consumption of a healthy dietary pattern results in  
24 631 significant reductions in C-reactive protein levels in adults: a meta-analysis. *Nutr Res.* 2016;36(5):391-  
25 632 401.
- 26 633 21. Ciaffi J, Mitselman D, Mancarella L, Brusi V, Lisi L, Ruscitti P, et al. The Effect of Ketogenic Diet on  
27 634 Inflammatory Arthritis and Cardiovascular Health in Rheumatic Conditions: A Mini Review. *Frontiers in*  
28 635 *Medicine.* 2021;8.
- 29 636 22. Russo GL. Dietary n-6 and n-3 polyunsaturated fatty acids: from biochemistry to clinical  
30 637 implications in cardiovascular prevention. *Biochem Pharmacol.* 2009;77(6):937-46.
- 31 638 23. Ricker MA, Haas WC. Anti-Inflammatory Diet in Clinical Practice: A Review. *Nutr Clin Pract.*  
32 639 2017;32(3):318-25.
- 33 640 24. Li J, Lee DH, Hu J, Tabung FK, Li Y, Bhupathiraju SN, et al. Dietary Inflammatory Potential and  
34 641 Risk of Cardiovascular Disease Among Men and Women in the U.S. *J Am Coll Cardiol.* 2020;76(19):2181-  
35 642 93.
- 36 643 25. D'Andrea Meira I, Romão TT, Pires do Prado HJ, Krüger LT, Pires MEP, da Conceição PO.  
37 644 Ketogenic Diet and Epilepsy: What We Know So Far. *Front Neurosci.* 2019;13:5.
- 38 645 26. Schönenberger KA, Schüpfer AC, Gloy VL, Hasler P, Stanga Z, Kaegi-Braun N, et al. Effect of Anti-  
39 646 Inflammatory Diets on Pain in Rheumatoid Arthritis: A Systematic Review and Meta-Analysis. *Nutrients.*  
40 647 2021;13(12).
- 41 648 27. Dyer J, Davison G, Marcora SM, Mauger AR. Effect of a Mediterranean Type Diet on  
42 649 Inflammatory and Cartilage Degradation Biomarkers in Patients with Osteoarthritis. *J Nutr Health Aging.*  
43 650 2017;21(5):562-6.
- 44 651 28. Cooper I, Brukner P, Devlin B, Reddy A, Fulton M, Kemp J, et al. An anti-inflammatory diet  
45 652 intervention for knee osteoarthritis: a feasibility study. *BMC Musculoskeletal Disorders.* 2022;23.
- 46 653 29. Chan A-W, Tetzlaff JM, Gøtzsche PC, Altman DG, Mann H, Berlin JA, et al. SPIRIT 2013  
47 654 explanation and elaboration: guidance for protocols of clinical trials. *BMJ : British Medical Journal.*  
48 655 2013;346:e7586.
- 49 656 30. Moher D, Hopewell S, Schulz KF, Montori V, Gøtzsche PC, Devereaux PJ, et al. CONSORT 2010  
50 657 Explanation and Elaboration: updated guidelines for reporting parallel group randomised trials. *BMJ.*  
51 658 2010;340:c869.
- 52 659 31. National Clinical Guideline C. National Institute for Health and Clinical Excellence: Guidance.  
53 660 Osteoarthritis: Care and Management in Adults. London: National Institute for Health and Care  
54 661 Excellence (UK)

662 Copyright © National Clinical Guideline Centre, 2014.; 2014.

- 1  
2 663 32. Culvenor AG, Collins NJ, Guermazi A, Cook JL, Vicenzino B, Khan KM, et al. Early knee  
3 664 osteoarthritis is evident one year following anterior cruciate ligament reconstruction: a magnetic  
4 665 resonance imaging evaluation. *Arthritis Rheumatol*. 2015;67(4):946-55.
- 5 666 33. Culvenor AG, Collins NJ, Guermazi A, Cook JL, Vicenzino B, Whitehead TS, et al. Early  
6 667 Patellofemoral Osteoarthritis Features One Year After Anterior Cruciate Ligament Reconstruction:  
7 668 Symptoms and Quality of Life at Three Years. *Arthritis Care Res (Hoboken)*. 2016;68(6):784-92.
- 8 669 34. Hoffmann TC, Glasziou PP, Boutron I, Milne R, Perera R, Moher D, et al. Better reporting of  
9 670 interventions: template for intervention description and replication (TIDieR) checklist and guide. *BMJ* :  
10 671 *British Medical Journal*. 2014;348:g1687.
- 11 672 35. Brukner DP. *A Fat Lot of Good*. 1 ed: Penguin Australia Pty Ltd; 2018. 368 p.
- 12 673 36. Wingrove K, Lawrence MA, Russell C, McNaughton SA. Evidence Use in the Development of the  
13 674 Australian Dietary Guidelines: A Qualitative Study. *Nutrients*. 2021;13(11):3748.
- 14 675 37. Cant RP. Patterns of delivery of dietetic care in private practice for patients referred under  
15 676 Medicare Chronic Disease Management: results of a national survey. *Aust Health Rev*. 2010;34(2):197-  
16 677 203.
- 17 678 38. Spencer L, O'Shea MC, Ball L, Desbrow B, Leveritt M. Attendance, weight and waist  
18 679 circumference outcomes of patients with type 2 diabetes receiving Medicare-subsidised dietetic  
19 680 services. *Aust J Prim Health*. 2014;20(3):291-7.
- 20 681 39. Health N, Council MR. *Australian dietary guidelines*. Canberra (Australia): National Health and  
21 682 Medical Research Council. 2013.
- 22 683 40. Harris PA, Taylor R, Minor BL, Elliott V, Fernandez M, O'Neal L, et al. The REDCap consortium:  
23 684 Building an international community of software platform partners. *J Biomed Inform*. 2019;95:103208.
- 24 685 41. Gudbergesen H, Bartels EM, Krusager P, Wæhrens EE, Christensen R, Danneskiold-Samsøe B, et  
25 686 al. Test-retest of computerized health status questionnaires frequently used in the monitoring of knee  
26 687 osteoarthritis: a randomized crossover trial. *BMC Musculoskeletal Disorders*. 2011;12(1):190.
- 27 688 42. Culvenor AG, West TJ, Bruder AM, Scholes MJ, Barton CJ, Roos EM, et al. Supervised exercise-  
28 689 therapy and Patient Education Rehabilitation (SUPER) versus minimal intervention for young adults at  
29 690 risk of knee osteoarthritis after ACL reconstruction: SUPER-Knee randomised controlled trial protocol.  
30 691 *BMJ Open*. 2023;13(1):e068279.
- 31 692 43. Davis TC, Crouch MA, Long SW, Jackson RH, Bates P, George RB, et al. Rapid assessment of  
32 693 literacy levels of adult primary care patients. *Fam Med*. 1991;23(6):433-5.
- 33 694 44. Skou ST, Roos EM, Laursen MB, Rathleff MS, Arendt-Nielsen L, Simonsen O, et al. A Randomized,  
34 695 Controlled Trial of Total Knee Replacement. *N Engl J Med*. 2015;373(17):1597-606.
- 35 696 45. Collins NJ, Prinsen CA, Christensen R, Bartels EM, Terwee CB, Roos EM. Knee Injury and  
36 697 Osteoarthritis Outcome Score (KOOS): systematic review and meta-analysis of measurement properties.  
37 698 *Osteoarthritis Cartilage*. 2016;24(8):1317-29.
- 38 699 46. Tubach F, Ravaud P, Baron G, Falissard B, Logeart I, Bellamy N, et al. Evaluation of clinically  
39 700 relevant states in patient reported outcomes in knee and hip osteoarthritis: the patient acceptable  
40 701 symptom state. *Ann Rheum Dis*. 2005;64(1):34-7.
- 41 702 47. Dobson F, Hinman RS, Roos EM, Abbott JH, Stratford P, Davis AM, et al. OARSI recommended  
42 703 performance-based tests to assess physical function in people diagnosed with hip or knee osteoarthritis.  
43 704 *Osteoarthritis and Cartilage*. 2013;21(8):1042-52.
- 44 705 48. Shepherd JA, Ng BK, Sommer MJ, Heymsfield SB. Body composition by DXA. *Bone*.  
45 706 2017;104:101-5.
- 46 707 49. Zorzela L, Loke YK, Ioannidis JP, Golder S, Santaguida P, Altman DG, et al. PRISMA harms  
47 708 checklist: improving harms reporting in systematic reviews. *Bmj*. 2016;352:i157.
- 48 709 50. Shivappa N, Steck SE, Hurley TG, Hussey JR, Hébert JR. Designing and developing a literature-  
49 710 derived, population-based dietary inflammatory index. *Public Health Nutr*. 2014;17(8):1689-96.
- 50 711 51. Janssen MF, Pickard AS, Golicki D, Gudex C, Niewada M, Scalone L, et al. Measurement  
51 712 properties of the EQ-5D-5L compared to the EQ-5D-3L across eight patient groups: a multi-country  
52 713 study. *Qual Life Res*. 2013;22(7):1717-27.
- 53 714 52. Hurst NP, Kind P, Ruta D, Hunter M, Stubbings A. Measuring health-related quality of life in  
54 715 rheumatoid arthritis: validity, responsiveness and reliability of EuroQol (EQ-5D). *Br J Rheumatol*.  
55 716 1997;36(5):551-9.

- 1  
2 717 53. Cleeland CS, Ryan KM. Pain assessment: global use of the Brief Pain Inventory. *Ann Acad Med Singap.* 1994;23(2):129-38.
- 3 718  
4 719 54. Mendoza T, Mayne T, Rublee D, Cleeland C. Reliability and validity of a modified Brief Pain  
5 720 Inventory short form in patients with osteoarthritis. *Eur J Pain.* 2006;10(4):353-61.
- 6 721 55. Roth SH, Fleischmann RM, Burch FX, Dietz F, Bockow B, Rapoport RJ, et al. Around-the-Clock,  
7 722 Controlled-Release Oxycodone Therapy for Osteoarthritis-Related Pain: Placebo-Controlled Trial and  
8 723 Long-term Evaluation. *Archives of Internal Medicine.* 2000;160(6):853-60.
- 9 724 56. Craig CL, Marshall AL, Sjöström M, Bauman AE, Booth ML, Ainsworth BE, et al. International  
10 725 physical activity questionnaire: 12-country reliability and validity. *Med Sci Sports Exerc.*  
11 726 2003;35(8):1381-95.
- 12 727 57. Maddison R, Ni Mhurchu C, Jiang Y, Vander Hoorn S, Rodgers A, Lawes CM, et al. International  
13 728 Physical Activity Questionnaire (IPAQ) and New Zealand Physical Activity Questionnaire (NZPAQ): a  
14 729 doubly labelled water validation. *Int J Behav Nutr Phys Act.* 2007;4:62.
- 15 730 58. Cleland C, Ferguson S, Ellis G, Hunter RF. Validity of the International Physical Activity  
16 731 Questionnaire (IPAQ) for assessing moderate-to-vigorous physical activity and sedentary behaviour of  
17 732 older adults in the United Kingdom. *BMC Medical Research Methodology.* 2018;18(1):176.
- 18 733 59. Sjostrom M, Ainsworth BE, Bauman A, Bull FC, Hamilton-Craig CR, Sallis JF, editors. Guidelines  
19 734 for data processing analysis of the International Physical Activity Questionnaire (IPAQ) - Short and long  
20 735 forms 2005.
- 21 736 60. AINSWORTH BE, HASKELL WL, WHITT MC, IRWIN ML, SWARTZ AM, STRATH SJ, et al.  
22 737 Compendium of Physical Activities: an update of activity codes and MET intensities. *Medicine & Science  
23 738 in Sports & Exercise.* 2000;32(9):S498-S516.
- 24 739 61. Dolatkah N, Toopchizadeh V, Barmaki S, Salekzamani Y, Najjari A, Farshbaf-Khalili A, et al. The  
25 740 effect of an anti-inflammatory in comparison with a low caloric diet on physical and mental health in  
26 741 overweight and obese women with knee osteoarthritis: a randomized clinical trial. *Eur J Nutr.*  
27 742 2023;62(2):659-72.
- 28 743 62. Borm GF, Fransen J, Lemmens WA. A simple sample size formula for analysis of covariance in  
29 744 randomized clinical trials. *J Clin Epidemiol.* 2007;60(12):1234-8.
- 30 745 63. Silva MDC, Perriman DM, Fearon AM, Couldrick JM, Scarvell JM. Minimal important change and  
31 746 difference for knee osteoarthritis outcome measurement tools after non-surgical interventions: a  
32 747 systematic review. *BMJ Open.* 2023;13(5):e063026.
- 33 748 64. Lynggaard H, Bell J, Löscher C, Besseghir A, Rantell K, Schoder V, et al. Principles and  
34 749 recommendations for incorporating estimands into clinical study protocol templates. *Trials.*  
35 750 2022;23(1):685.
- 36 751 65. White IR, Kalaitzaki E, Thompson SG. Allowing for missing outcome data and incomplete uptake  
37 752 of randomised interventions, with application to an Internet-based alcohol trial. *Statistics in Medicine.*  
38 753 2011;30:3192-207.
- 39 754 66. Ritchie J, Spencer L, editors. *Qualitative data analysis for applied policy research* 2002.
- 40 755 67. Culvenor AG, West TJ, Bruder AM, Scholes MJ, Barton CJ, Roos EM, et al. Recruitment and  
41 756 baseline characteristics of young adults at risk of early-onset knee osteoarthritis after ACL  
42 757 reconstruction in the SUPER-Knee trial. under review. 2023.
- 43 758 68. Peiris CL, Culvenor AG. Metabolic syndrome and osteoarthritis: implications for the  
44 759 management of an increasingly common phenotype. *Osteoarthritis and Cartilage.* 2023; Online ahead of  
45 760 print.

51 761

52 762

53 762

54

55

56

57

58

59

60



Figure 1. Flow of participants through the trial. DXA, Dual X-ray Absorptiometry; KOOS, Knee injury and Osteoarthritis Outcome Score

\*Optional qualitative interview for process evaluation at 6 months

529x695mm (96 x 96 DPI)



1  
2  
3  
4  
5  
6  
7  
8  
9  
10  
11  
12  
13  
14  
15  
16  
17  
18  
19  
20  
21  
22  
23  
24  
25  
26  
27  
28  
29  
30  
31  
32  
33  
34  
35  
36  
37  
38  
39  
40  
41  
42  
43  
44  
45  
46  
47  
48  
49  
50  
51  
52  
53  
54  
55  
56  
57  
58  
59  
60

# FEAST

## SAMPLE FROM LOW-FAT PARTICIPANT BOOKLET

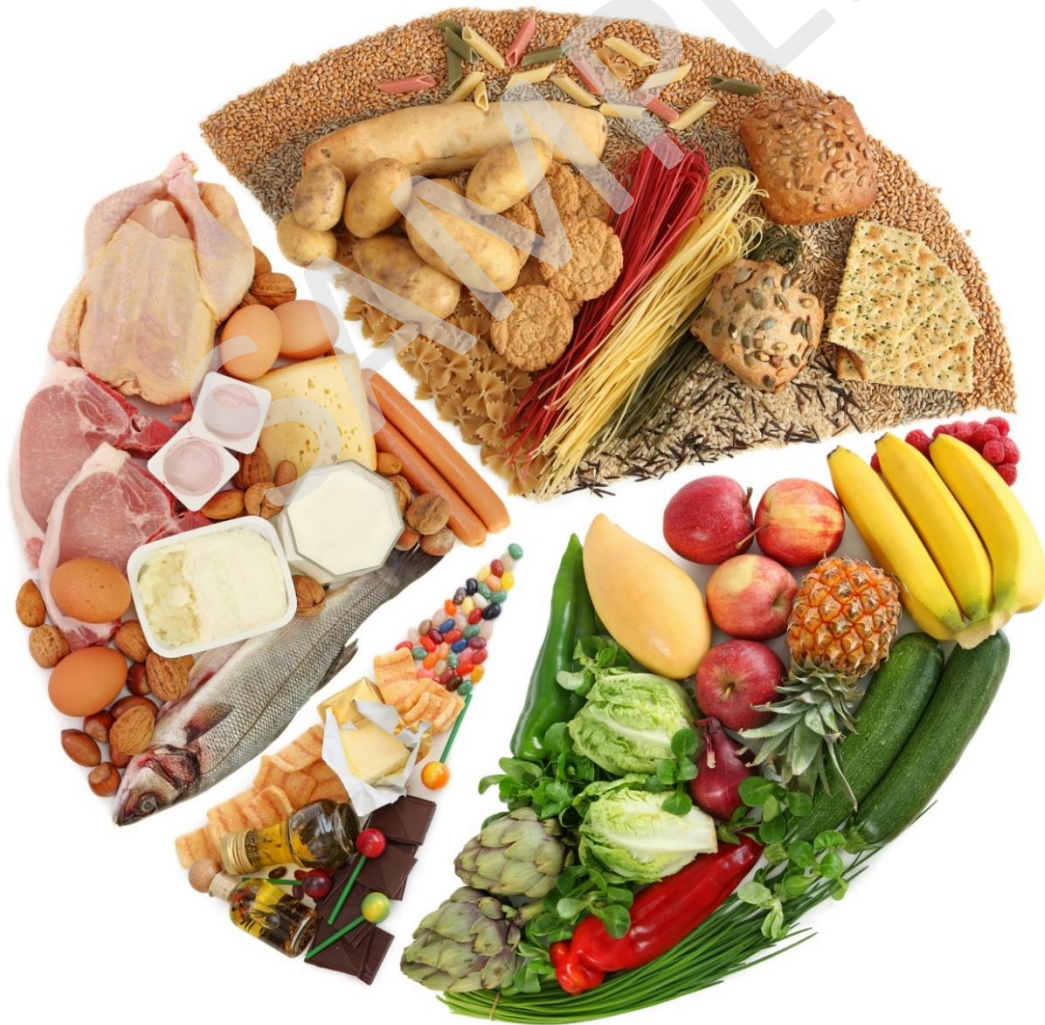





Australian Government  
National Health and Medical Research Council  
Department of Health and Ageing

www.eatforhealth.gov.au

# Australian Guide to Healthy Eating

Enjoy a wide variety of nutritious foods from these five food groups every day.

Drink plenty of water.



Grain (cereal) foods, mostly wholegrain and/or high cereal fibre varieties



Vegetables and legumes/beans



Lean meats and poultry, fish, eggs, tofu, nuts and seeds and legumes/beans



Fruit



Milk, yoghurt, cheese and/or alternatives, mostly reduced fat



Use small amounts

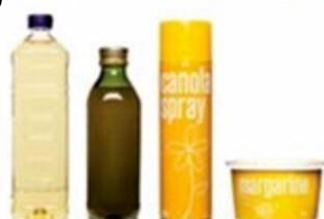

Only sometimes and in small amounts

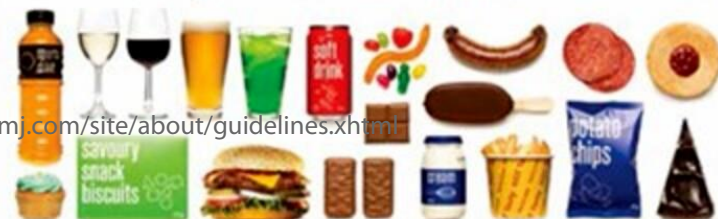



## Vegetables and legumes

Vegetables, including legumes/beans are nutrient dense, low in kilojoules, and are a good source of minerals and vitamins (such as magnesium, vitamin C and folate), dietary fibre and a range of natural plant chemicals such as carotenoids. Legumes include chickpeas, kidney beans, and peas. **Aim for 5 serves a day.**

### What is a serve of vegetables\*?

A standard serve is about 75g (100–350kJ) or:

|          |                                                                                        |
|----------|----------------------------------------------------------------------------------------|
| ½ cup    | cooked green or orange vegetables (for example, broccoli, spinach, carrots or pumpkin) |
| ½ cup    | cooked dried or canned beans, peas or lentils                                          |
| 1 cup    | green leafy or raw salad vegetables                                                    |
| ½ cup    | sweet corn                                                                             |
| ½ medium | potato or other starchy vegetables (sweet potato, taro or cassava)                     |
| 1 medium | tomato                                                                                 |



\*With canned varieties, choose those with no added salt

## Fruit

A wide variety of fruit is grown and available in Australia. Choosing fruits in season provides **better value and better quality**. And just like with veggies, choosing different coloured fruits increases the variety of nutrients, which can enhance your health! Aim for **two serves** of fruit a day.

Try eating fruits from these different fruit categories:

- citrus fruit such as oranges, mandarins, and grapefruit
- pome fruits such as apples and pears
- stone fruit such as apricots, cherries, peaches, nectarines, and plums
- tropical fruit such as bananas, papaya, mangoes, pineapple, and melons
- berries

### What is a serve of fruit?

A standard serve is about 150g (350kJ) or:

|          |                                        |
|----------|----------------------------------------|
| 1 medium | apple, banana, orange or pear          |
| 2 small  | apricots, kiwi fruits or plums         |
| 1 cup    | diced or canned fruit (no added sugar) |

Or only occasionally:

|               |                                                                               |
|---------------|-------------------------------------------------------------------------------|
| 125ml (½ cup) | fruit juice (no added sugar)                                                  |
| 30g           | dried fruit (for example, 4 dried apricot halves, 1½ tablespoons of sultanas) |

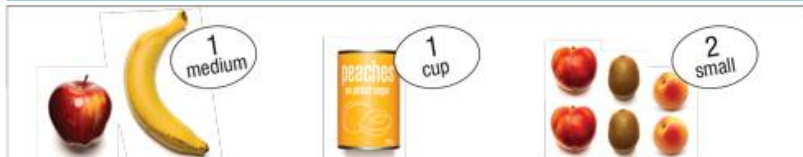

- other fruits such as grapes and passionfruit

Enjoy more fruit by trying:

- chopped fruit to cereal, porridge, salad, or toast
- fruit as a convenient snack while out and about
- fruit-based desserts (baked apples, fruit crumbles, stewed/ poached fruit)
- adding fruit to pancakes, scones, pikelets, and low-fat muffins.



## Wholegrains

All types of grains are good sources of complex carbohydrates and some key vitamins and minerals. Grain foods are mostly made from wheat, oats, rice, rye, barley, millet, quinoa and corn.

Wholegrains are naturally high in fibre, helping you feel full and satisfied — which makes it easier to maintain a healthy body weight. Nutritionally, wholegrain and wholemeal foods are very similar.

### What is a serve of grain\* (cereal) food?

A standard serve is (500kJ) or:

|                 |                                                                                     |
|-----------------|-------------------------------------------------------------------------------------|
| 1 slice (40g)   | bread                                                                               |
| ½ medium (40g)  | roll or flat bread                                                                  |
| ½ cup (75-120g) | cooked rice, pasta, noodles, barley, buckwheat, semolina, polenta, bulgur or quinoa |
| ½ cup (120g)    | cooked porridge                                                                     |
| ⅔ cup (30g)     | wheat cereal flakes                                                                 |
| ¼ cup (30g)     | muesli                                                                              |
| 3 (35g)         | crispbreads                                                                         |
| 1 (60g)         | crumpet                                                                             |
| 1 small (35g)   | English muffin or scone                                                             |

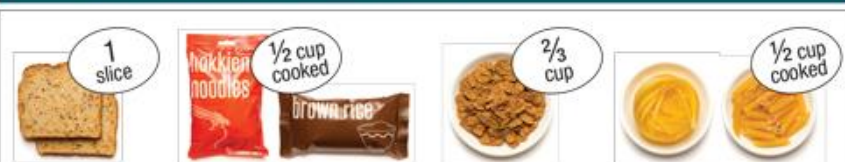

\*Grain (cereal) foods, mostly wholegrain and/or high cereal fibre varieties

For peer review only - <http://bmjopen.bmj.com/site/about/guidelines.xhtml>

Aim for 4-6 serves of grain foods a day. Additional serves can be eaten depending on your activity level.

### Enjoy more wholegrains by having:

- breakfasts that include whole-grain cereals, like oatmeal.
- wholemeal toast or wholemeal bagels for white-flour versions.
- low-fat muffins made with whole-grain flours.
- sandwiches using whole-grain breads or rolls.
- quinoa, brown rice, wild rice, barley or bulgur instead of white rice.
- wild rice or barley in soups, stews, casseroles and salads.
- rolled oats or crushed whole-wheat bran cereal in recipes instead of dry breadcrumbs.

### Lean meat and poultry, fish, eggs, tofu, nuts and seeds

These are a critical part of having enough protein each day. They also provide other nutrients such as: iodine, iron, zinc, vitamins, especially B12, and essential fatty acids.

There's a lot to choose from:

- Lean meats - Beef, lamb, veal, pork, kangaroo
- Poultry - Chicken, turkey, duck, emu, goose, bush birds
- Fish and seafood - Fish, prawns, crab, lobster, mussels, oysters, scallops, clams
- Eggs
- Nuts and seeds - Almonds, pine nuts, walnut, macadamia, hazelnut, cashew, peanut, nut spreads, and pumpkin seeds
- Legumes/beans - All beans, lentils, chickpeas, split peas, tofu.

**How much is a serve of lean meat and poultry, fish, eggs, nuts and seeds, and legumes/beans\*?**

**A standard serve is (500–600kJ):**

|                |                                                                                            |
|----------------|--------------------------------------------------------------------------------------------|
| 65g            | cooked lean red meats such as beef, lamb, veal, pork, goat or kangaroo (about 90-100g raw) |
| 80g            | cooked lean poultry such as chicken or turkey (100g raw)                                   |
| 100g           | cooked fish fillet (about 115g raw) or one small can of fish                               |
| 2 large (120g) | eggs                                                                                       |
| 1 cup (150g)   | cooked or canned legumes/beans such as lentils, chick peas or split peas                   |
| 170g           | tofu                                                                                       |
| 30g            | nuts, seeds, peanut or almond butter or tahini or other nut or seed paste                  |



\*Choose those with no added salt

## Milk, yoghurt, cheese, and/or alternatives

Dairy products (and dairy alternatives) are rich in calcium, protein, and lots of nutrients. Dairy foods contribute to strong bones. Aim for **at least 2-3 serves daily**.

Examples of milk, yoghurt, cheese and/or alternatives include:

- Milks - All reduced fat or full cream milks, plain and flavoured, long life milks, fortified soy beverages
- Yoghurt - All yoghurts including reduced fat or full cream, plain and flavoured, soy yoghurt (calcium fortified)
- Cheese - All hard cheeses, reduced or full fat for example cheddar, Gouda, Swiss

**How much is a serve of milk\*, yoghurt\*, cheese\* and/or alternatives?**

**A standard serve is (500–600kJ):**

|                |                                                                                |
|----------------|--------------------------------------------------------------------------------|
| 1 cup (250ml)  | fresh, UHT long life, reconstituted powdered milk or buttermilk                |
| ½ cup (120ml)  | evaporated milk                                                                |
| 2 slices (40g) | or 4 x 3 x 2cm cube (40g) of hard cheese, such as cheddar                      |
| ½ cup (120g)   | ricotta cheese                                                                 |
| ¾ cup (200g)   | yoghurt                                                                        |
| 1 cup (250ml)  | soy, rice or other cereal drink with at least 100mg of added calcium per 100ml |

**The following foods contain about the same amount of calcium as a serve of milk, yoghurt or cheese:**

|              |                                                    |
|--------------|----------------------------------------------------|
| 100g         | almonds with skin                                  |
| 60g          | sardines, canned in water                          |
| ½ cup (100g) | canned pink salmon with bones                      |
| 100g         | firm tofu (check the label as calcium levels vary) |

\*Choose mostly reduced fat





## EXAMPLE WEEKLY MEAL PLANS

Here are examples of what a week might look like. Consider these plans as a guide to give you ideas, not something written in stone! Most of the recipes below can be found on the **Defeat Diabetes** app, or by simply searching on Google online.

Lots of other anti-inflammatory/low-carbohydrate ideas online at: <https://www.eatthebutter.org/dinner-ideas/>

### Week 1

|                  | Monday                                          | Tuesday                      | Wednesday                 | Thursday                                        | Friday                                          | Saturday                                | Sunday                                     |
|------------------|-------------------------------------------------|------------------------------|---------------------------|-------------------------------------------------|-------------------------------------------------|-----------------------------------------|--------------------------------------------|
| <b>Breakfast</b> | Raspberrry chia pot                             | Yoghurt with berries         | Raspberrry chia pot       | Coconut crunch granola                          | Berry yoghurt smoothie                          | Scrambled eggs with spinach and avocado | Zucchini and feta fritters                 |
| <b>Snack</b>     | Apple with peanut butter                        | Hummus and veggies           | Apple with peanut butter  | Handful of almonds with piece of dark chocolate | Hummus and veggies                              | Apple with peanut butter                | Handful of walnuts                         |
| <b>Lunch</b>     | Roast vegetable salad                           | Salad with can of tuna       | Leftover prawn pad thai   | Leftover burrito bowl                           | Salad with can of tuna                          | Salmon with cauliflower rice bowl       | One pan spiced halloumi and eggplant       |
| <b>Snack</b>     | Handful of almonds with piece of dark chocolate | Almond meal blueberry muffin | Zucchini and feta fritter | Almond meal blueberry muffin                    | Handful of almonds with piece of dark chocolate | Yoghurt with berries                    | Almond meal blueberry muffin               |
| <b>Dinner</b>    | Garlic prawns with zoodles                      | Beef pad thai                | 15-minute burrito bowl    | Miso barramundi with vegetables                 | Swedish meatballs                               | Baked portobello mushrooms with feta    | Grilled lamb chops with roasted vegetables |



1  
2  
3  
4  
5  
6  
7  
8  
9  
10  
11  
12  
13  
14  
15  
16  
17  
18  
19  
20  
21  
22  
23  
24  
25  
26  
27  
28  
29  
30  
31  
32  
33  
34  
35  
36  
37  
38  
39  
40  
41  
42  
43  
44  
45  
46

## Week 2

|                  | Monday                           | Tuesday                                         | Wednesday                               | Thursday                                              | Friday                                     | Saturday                                         | Sunday                               |
|------------------|----------------------------------|-------------------------------------------------|-----------------------------------------|-------------------------------------------------------|--------------------------------------------|--------------------------------------------------|--------------------------------------|
| <b>Breakfast</b> | Coconut crunch granola           | Berry smoothie                                  | Scrambled eggs with spinach and avocado | Berry smoothie                                        | Coconut crunch granola                     | Scrambled eggs with spinach and avocado          | Shakshuka                            |
| <b>Snack</b>     | Mini frittata                    | Pear                                            | Apple with handful of almonds           | Pear                                                  | Mini frittata                              | Handful of walnuts with piece of dark chocolate  | Yoghurt with berries                 |
| <b>Lunch</b>     | Salad with sliced steak          | Easy Tuna Niçoise                               | Leftover stuffed capsicum               | Leftover burger patty with salad                      | Leftover green curry with cauliflower rice | Caesar salad                                     | Warm veggie salad with almonds       |
| <b>Snack</b>     | Slice of orange almond meal cake | Handful of walnuts with piece of dark chocolate | Mini frittata                           | Slice of orange almond meal cake                      | Apple with handful of almonds              | Yoghurt with berries                             | Pear                                 |
| <b>Dinner</b>    | Salmon poke bowl                 | Stuffed capsicums                               | Smoky beef burger on mushroom buns      | Green vegetable and prawn curry with cauliflower rice | Easy mushroom, lemon, and garlic chicken   | Cauliflower pizza with pesto, sausage, and herbs | Grilled steak and roasted vegetables |

## Week 3

|                  | Monday                      | Tuesday                                          | Wednesday                           | Thursday                      | Friday                                      | Saturday                             | Sunday                                     |
|------------------|-----------------------------|--------------------------------------------------|-------------------------------------|-------------------------------|---------------------------------------------|--------------------------------------|--------------------------------------------|
| <b>Breakfast</b> | Breakfast egg muffins       | Berry yoghurt smoothie                           | Breakfast egg muffins               | Chia pudding pot              | Berry yoghurt smoothie                      | Bacon and eggs with roasted tomatoes | Mexican breakfast scramble                 |
| <b>Snack</b>     | Chia pudding pot            | Beef jerky                                       | Greek yoghurt with berries          | Breakfast egg muffins         | Handful of almonds with cheese stick        | Apple with peanut butter             | Strawberry power balls                     |
| <b>Lunch</b>     | Zucchini and walnut salad   | Leftover beef burrito bowl                       | Leftover salmon patties with salad  | Greek salad                   | Leftover tagine                             | Kale, broccoli and almond salad      | Mushroom soup with crispy cheese croutons  |
| <b>Snack</b>     | Strawberry power balls      | Handful of almonds with square of dark chocolate | Strawberry power balls              | Handful of almonds with apple | Dark chocolate (avocado) mousse             | Beef jerky                           | Dark chocolate (avocado) mousse            |
| <b>Dinner</b>    | 15-minute beef burrito bowl | Salmon patties with feta sauce and beet salad    | Chicken curry with cauliflower rice | Lamb and apricot tagine       | Pan-seared barramundi with cauliflower mash | Zucchini lasagne                     | Grilled lamb chops with roasted vegetables |

## Week 4

|                  | Monday                    | Tuesday                           | Wednesday                 | Thursday                          | Friday                    | Saturday      | Sunday                |
|------------------|---------------------------|-----------------------------------|---------------------------|-----------------------------------|---------------------------|---------------|-----------------------|
| <b>Breakfast</b> | Coconut granola with milk | Blueberry almond protein smoothie | Vegetable cheese frittata | Blueberry almond protein smoothie | Coconut granola with milk | Tofu scramble | Almond flour pancakes |

|    |               |                                     |                                              |                                 |                                    |                                        |                                            |                                             |
|----|---------------|-------------------------------------|----------------------------------------------|---------------------------------|------------------------------------|----------------------------------------|--------------------------------------------|---------------------------------------------|
| 1  | <b>Snack</b>  | Roasted chickpeas                   | Slice of almond flour banana bread           | Greek yoghurt with berries      | Peanut butter balls                | Beef jerky                             | Roasted chickpeas                          | Handful of walnuts                          |
| 2  |               |                                     |                                              |                                 |                                    |                                        |                                            |                                             |
| 3  |               |                                     |                                              |                                 |                                    |                                        |                                            |                                             |
| 4  |               |                                     |                                              |                                 |                                    |                                        |                                            |                                             |
| 5  | <b>Lunch</b>  | Vegetable cheese frittata           | Leftover roast vegetable salad with halloumi | Leftover broccoli and leek soup | Vegetable cheese frittata          | Kale Caesar salad                      | Leftover stuffed capsicums                 | Creamy Tuscan soup                          |
| 6  |               |                                     |                                              |                                 |                                    |                                        |                                            |                                             |
| 7  |               |                                     |                                              |                                 |                                    |                                        |                                            |                                             |
| 8  |               |                                     |                                              |                                 |                                    |                                        |                                            |                                             |
| 9  | <b>Snack</b>  | Slice of almond flour banana bread  | Handful of almonds with dark chocolate       | Roasted chickpeas               | Slice of almond flour banana bread | Handful of almonds with dark chocolate | Greek yoghurt with berries                 | Peanut butter balls                         |
| 10 |               |                                     |                                              |                                 |                                    |                                        |                                            |                                             |
| 11 |               |                                     |                                              |                                 |                                    |                                        |                                            |                                             |
| 12 |               |                                     |                                              |                                 |                                    |                                        |                                            |                                             |
| 13 | <b>Dinner</b> | Roast vegetable salad with halloumi | Cheesy broccoli soup                         | Spicy tofu san choi bao         | Vegetarian stuffed zucchini boats  | Stuffed capsicums                      | Beetroot & halloumi salad with pomegranate | Spiced eggplant curry with cauliflower rice |
| 14 |               |                                     |                                              |                                 |                                    |                                        |                                            |                                             |
| 15 |               |                                     |                                              |                                 |                                    |                                        |                                            |                                             |
| 16 |               |                                     |                                              |                                 |                                    |                                        |                                            |                                             |
| 17 |               |                                     |                                              |                                 |                                    |                                        |                                            |                                             |
| 18 |               |                                     |                                              |                                 |                                    |                                        |                                            |                                             |
| 19 |               |                                     |                                              |                                 |                                    |                                        |                                            |                                             |
| 20 |               |                                     |                                              |                                 |                                    |                                        |                                            |                                             |
| 21 |               |                                     |                                              |                                 |                                    |                                        |                                            |                                             |
| 22 |               |                                     |                                              |                                 |                                    |                                        |                                            |                                             |
| 23 |               |                                     |                                              |                                 |                                    |                                        |                                            |                                             |
| 24 |               |                                     |                                              |                                 |                                    |                                        |                                            |                                             |
| 25 |               |                                     |                                              |                                 |                                    |                                        |                                            |                                             |
| 26 |               |                                     |                                              |                                 |                                    |                                        |                                            |                                             |
| 27 |               |                                     |                                              |                                 |                                    |                                        |                                            |                                             |
| 28 |               |                                     |                                              |                                 |                                    |                                        |                                            |                                             |
| 29 |               |                                     |                                              |                                 |                                    |                                        |                                            |                                             |
| 30 |               |                                     |                                              |                                 |                                    |                                        |                                            |                                             |
| 31 |               |                                     |                                              |                                 |                                    |                                        |                                            |                                             |
| 32 |               |                                     |                                              |                                 |                                    |                                        |                                            |                                             |
| 33 |               |                                     |                                              |                                 |                                    |                                        |                                            |                                             |
| 34 |               |                                     |                                              |                                 |                                    |                                        |                                            |                                             |
| 35 |               |                                     |                                              |                                 |                                    |                                        |                                            |                                             |
| 36 |               |                                     |                                              |                                 |                                    |                                        |                                            |                                             |
| 37 |               |                                     |                                              |                                 |                                    |                                        |                                            |                                             |
| 38 |               |                                     |                                              |                                 |                                    |                                        |                                            |                                             |
| 39 |               |                                     |                                              |                                 |                                    |                                        |                                            |                                             |
| 40 |               |                                     |                                              |                                 |                                    |                                        |                                            |                                             |
| 41 |               |                                     |                                              |                                 |                                    |                                        |                                            |                                             |
| 42 |               |                                     |                                              |                                 |                                    |                                        |                                            |                                             |
| 43 |               |                                     |                                              |                                 |                                    |                                        |                                            |                                             |
| 44 |               |                                     |                                              |                                 |                                    |                                        |                                            |                                             |
| 45 |               |                                     |                                              |                                 |                                    |                                        |                                            |                                             |
| 46 |               |                                     |                                              |                                 |                                    |                                        |                                            |                                             |

1  
2  
3 FEAST Project  
4  
5

---

6 **Standard Operating Procedure**  
7

8  
9 **Blood collection, processing, handling, and storage procedures**  
10

---

11  
12  
13  
14  
15  
16  
17  
18  
19  
20  
21  
22  
23  
24  
25  
26  
27  
28  
29  
30  
31  
32  
33  
34  
35  
36  
37  
38  
39  
40  
41  
42  
43  
44  
45  
46  
47  
48  
49  
50  
51  
52  
53  
54  
55  
56  
57  
58  
59  
60

For peer review only

## 1.1 Purpose

The purpose of the current SOP is to provide step-by-step instructions on the exact procedures that the research team needs to follow for conducting venous blood collection for biochemical analysis at baseline and follow-up examination.

## 1.2 General procedures for venous blood collection

Venous blood samples will be obtained from each participant for biochemical analysis following a 12-hour overnight fast, at baseline (T1), 12 weeks (T2) and 6 months (T3) (figure 1)

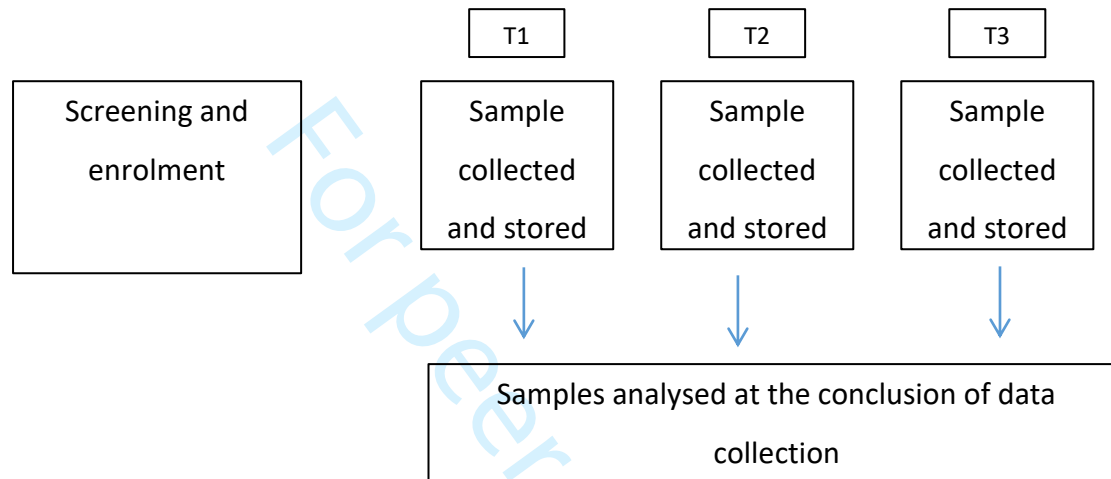

Figure 1: Study design

The researcher will perform venepuncture to obtain no more than 30mL of blood.

### 1.2.1 Consumables and supplies required for performing venepuncture

The consumables and supplies that will be used for performing the venepuncture in the study are the following:

- Disposable Latex gloves must be worn by the researcher and anyone else assisting with blood collection.
- Alcohol swab will be used to clean the venepuncture site.
- Winged steel needles appropriate for adults with an extension tube (a butterfly) will be used. The butterfly will have either a syringe or an evacuated tube with an adaptor. Sterile gauze pads will....
- Adhesive hypo allergic bandages (plasters or Band-Aids) will be applied to the puncture site to minimize the risk of infection.
- Plastic Bag for Waste will be used to dispose all of the biohazardous waste generated as well as a sharps biocontainer to dispose of all needles.

### 1.2.2 Steps in obtaining venous blood from the participant

The steps for obtaining venous blood samples from the study participants are provided below:

**Step 1:** Complete general preparation.

- Find an indoor site to encourage privacy during blood collection. The site should have a table or other piece of furniture with a flat surface where you can lay out all consumables/ supplies. An examination bed should be readily available if the respondent feels faint and needs to lie down.
- Ensure that each subject has completed a 10-hour fast.

- Wash and dry hands, put on gloves before initiating blood collection from the participant.
- Take out a clean absorbent paper sheet and spread it over a flat surface to lay out consumable and supplies.

**Step 2:** Prepare the participant for the venepuncture.

- The individual should be seated comfortably in a chair with arm extended on the slanting armrest to form a straight line from the shoulder to the wrist. The arm and elbow should be supported firmly by the armrest and should not be bent at the elbow.
- Ask each volunteer if they have a history of fainting. If so, ensure that the blood sample is only drawn whilst the subject is lying down on a bed.
- Describe to the participant exactly what will be done during the collection of the blood sample.

**Step 3:** Prepare the venepuncture site.

- Apply (tighten) tourniquet.
- Ask the participant to close his/her hand so that the veins will become more prominent and thus easier to enter. Vigorous hand exercise or "pumping" should be avoided.
- Select the vein site. Palpate and trace the path of veins several times with the index finger. If superficial veins are not readily apparent, blood can be forced into the vein by gently massaging the arm from wrist to elbow. Several sharp taps at the vein site with index and second finger will cause the vein to dilate.
- Loosen tourniquet.
- The venepuncture site must be cleansed once with an alcohol swab to prevent any chemical or microbiologic contamination of either the patient or the specimen.
- Check equipment, tube selection and thread needle (or butterfly) securely onto tube holder (barrel).
- Re-apply the tourniquet and relocated vein position and direction. A tourniquet allows the veins to fill with blood, thus making the veins more prominent and easier to enter. Do not leave the tourniquet on for longer than 1 minute otherwise it may result in either hemoconcentration or variation in blood test values.
- Remove needle cover and check bevel is orientated uppermost.

**Step 4:** Blood drawing

- Puncture the skin 3–5 mm away from the vein; this allows good access without pushing the vein away.
- If the needle enters alongside the vein rather than into it, withdraw the needle slightly without removing it completely, and angle it into the vessel.
- Insert the tube into the holder and commence filling the tubes.
- Draw blood slowly and steadily.
- Release the tourniquet as soon as blood flow is established. Tourniquet release allows the blood circulation to return to normal and also reduces bleeding at the venipuncture site.
- Remove the tube from the holder and invert (8-10 times) to mix the blood with tube additives. Place blood samples on ice if required..
- Place a cotton wool above the venepuncture site, withdraw the needle and apply pressure.
- Dispose of needle in a sharps container.
- Check site and apply an adhesive bandage.
- Label all tubes immediately.



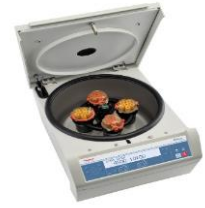

### 1.3 Blood processing and handling

#### 1.3.1 Centrifuge procedure

Collected venous blood will be centrifuged and the extracted plasma and/or serum will be pipetted into aliquots according to the blood collection protocol.

- Set up in a well-ventilated environment, on a horizontally levelled and rigid surface with adequate load-bearing capacity.
- As safety zone maintain a clear radius of at least 30 cm around the centrifuge. Do not place any dangerous substances within this security zone.
- Open the centrifuge door by pressing the open button.
- Place the remaining tubes containing blood into appropriate sized adapters.
- Place the tubes containing water in opposite adapters, where they should mirror the placement of the tubes holding blood.
- Never place both tubes housing water and blood into the same adapters but should be placed in different adapters for even weight distribution.
- Place the adapters carefully and gently into the rotor buckets
- Seal the buckets with the lids and close the centrifuge.
- Use only with rotors which have been loaded properly.
- Make sure the rotor is locked properly into place before operating the centrifuge.
- Never overload the rotor.
- Never start the centrifuge when the centrifuge door is open.
- Do not lean on the centrifuge.
- Do not place anything on top of the centrifuge during a run.
- Gently close the centrifuge door. The centrifuge door mechanism will click and lock in place.
- Turn on the centrifuge by pressing the start button.
- Select the required speed and time from preprogrammed setting or manually using the arrow keys (3000xg for 10 mins for each tube).

Once the centrifuge has completely stopped spinning wait for an audible sound and then open the centrifuge. Remove the tubes from the centrifuge and place them in a tube rack.

#### 1.3.2 Handling of collected blood

Three different types of test tubes will be used per study participant to collect venous blood. The collected blood will be designated for whole blood, or plasma and serum separation. One 8ml EDTA tube (with added anticoagulant) will be used to collect whole blood for analysis, one 6ml heparin tube will be used for plasma extraction, and one 8.5ml SST tube will be used for serum extraction. Tubes will be labelled with study timepoint (T1, T2 or T3), participant ID, and type of sample. All information regarding blood collection tubes is presented in Table 1.

**Table 1.** Volume of blood in different test tubes

| Test tube           | Blood volume | Designated for:           |
|---------------------|--------------|---------------------------|
| EDTA tube           | 6 ml         | Whole blood               |
| Heparin gel tube    | 6 ml         | Heparin plasma extraction |
| SST tube            | 8.5 ml       | Serum extraction          |
| <b>Total blood:</b> | 22.5ml       |                           |

- The whole blood sample (6ml) collected in the EDTA tube will be stored at -80°C, as indicated in Table 2.

**Table 2.** Volumes and use of EDTA whole blood sample.

| Whole blood aliquot no. | EDTA volume | Designated for the analysis of: |
|-------------------------|-------------|---------------------------------|
| 1                       | 6 ml        | HbA1c                           |

- The blood (8.5ml) collected in the SST tube will be left to separate at room temperature for 20 mins and then centrifuged at 3000 rpm for 10 min. The extracted (heparin) plasma will be pipetted into 4 aliquots of 1 ml (considering a 50% efficiency of centrifugation in plasma extraction). One aliquot of 1ml will be used for determining glucose, insulin, lipids, LFT and hsCRP, while the 3 aliquots of 1ml each will be stored at -80°C, as indicated in Table 3.

**Table 3.** Volumes and use of SST plasma aliquots.

| Plasma aliquot no. | EDTA plasma volume | Designated for the analysis of:      |
|--------------------|--------------------|--------------------------------------|
| 1                  | 1000 µl            | Glucose, insulin, lipids, LFT, hsCRP |
|                    |                    | <b>Designated for:</b>               |
| 2                  | 1000 µl            | Storage at -80°C                     |
| 3                  | 1000 µl            | Storage at -80°C                     |
| 4                  | 1000 µl            | Storage at -80°C                     |

- The blood (6 ml) collected in the heparin tube will be centrifuged at 3000 rpm for 10 min and the extracted plasma will be pipetted into 3 aliquots of 600 µl (considering a 50% efficiency of centrifugation in plasma extraction). One aliquot of 600 µl will be used for determining cytokine concentrations, while the remaining 3 aliquots of 500 µl each will be stored at -80°C, as indicated in Table 4.

**Table 4.** Volumes and use of heparin plasma aliquots.

| Plasma aliquot no. | Heparin plasma volume | Designated for the analysis of:               |
|--------------------|-----------------------|-----------------------------------------------|
| 1                  | 1ml                   | Cytokines (IL-1β, IL-6, IL-8, IL-10, and TNF) |
|                    |                       | <b>Designated for:</b>                        |
| 2                  | 1ml                   | Storage at -80°C                              |
| 3                  | 1ml                   | Storage at -80°C                              |
| 4                  | 1ml                   | Storage at -80°C                              |

**NOTE:** It is essential that ONLY NON-HAZARDOUS waste be placed in the wastepaper/ general rubbish bins. Pipette tips should be disposed in sharps containers, whereas laboratory and associated waste directly involved in specimen processing (i.e blood collection tubes, gloves etc) must be disposed in biological waste bags.

#### 1.4 Blood storage

Eppendorf tubes or screw cap tubes must be clearly labelled with identification, media used and date, placed in a freezer well rack and should not be stored for long periods on a bench, but must be transferred with an ice esky box to a dedicated storage area (i.e. refrigerator, cold room or cupboard) as soon as possible.

Laboratory coats must be removed and hung up before leaving laboratory areas and should be laundered once a week. Hands must be washed with an antibacterial agent BEFORE leaving laboratory (Hibiclens/Microshield or equivalent, followed by extensive rinsing).



## Participant Information Sheet/Consent Form

Interventional study - *Adult providing own consent*

|                                                                    |                                                                                                                                                                                                                                                                                                                                                                                                                                                                                    |
|--------------------------------------------------------------------|------------------------------------------------------------------------------------------------------------------------------------------------------------------------------------------------------------------------------------------------------------------------------------------------------------------------------------------------------------------------------------------------------------------------------------------------------------------------------------|
| <b>Title</b>                                                       | Optimising outcomes for people with knee pain through food: FEAST randomised controlled trial                                                                                                                                                                                                                                                                                                                                                                                      |
| <b>Short Title</b>                                                 | The FEAST trial                                                                                                                                                                                                                                                                                                                                                                                                                                                                    |
| <b>Ethics Reference Number</b>                                     | HEC22044                                                                                                                                                                                                                                                                                                                                                                                                                                                                           |
| <b>Project Sponsor</b>                                             | La Trobe University                                                                                                                                                                                                                                                                                                                                                                                                                                                                |
| <b>Coordinating Principal Investigator/ Principal Investigator</b> | Dr Adam Culvenor (School of Allied Health, Human Services and Sport (SAHHSS), La Trobe University)                                                                                                                                                                                                                                                                                                                                                                                 |
| <b>Associate Investigator(s)</b>                                   | Dr Brooke Devlin (School of Human Movement and Nutrition Sciences, University of Queensland)<br>Prof. Peter Brukner (SAHHSS, La Trobe University)<br>Ass. Prof. Joanne Kemp (SAHHSS, La Trobe University)<br>Prof. Kay Crossley (SAHHSS, La Trobe University)<br>Dr Andrea Mosler (SAHHSS, La Trobe University)<br>Dr Josh Heerey (SAHHSS, La Trobe University)<br>Ms Lynette Law (PhD student, SAHHSS, La Trobe University)<br>Ms Amanda Attanayake (SAHHSS, La Trobe University) |
| <b>Location</b>                                                    | La Trobe University                                                                                                                                                                                                                                                                                                                                                                                                                                                                |

### Part 1 What does my participation involve?

#### 1 Introduction

You are invited to take part in this research project because you have knee pain. This research project aims to assess the effectiveness of two different programs provided through advice and education by a qualified dietitian to improve your knee pain, function and quality of life.

This information sheet tells you about the research project. It explains the tests and treatments involved. Knowing what is involved will help you decide if you want to take part in the project. Please read this information carefully. Ask questions about anything that you don't understand or want to know more about. Before deciding whether or not to take part, you might want to talk about it with a relative, friend or your local doctor.

#### ***Your participation is voluntary***

Participation in this research is completely voluntary and there will be no cost to you. If you don't wish to take part, you don't have to. If you decide you want to take part, you will be given a copy of this Participant Information Sheet and asked to sign the consent section. By signing it you are telling us that you:

- Understand what you have read
- Consent to take part in the research project
- Consent to have the tests and treatments that are described
- Consent to the use of your personal and health information as described.

You will be given a copy of this Participation Information Sheet and Consent Form to keep.

## 2 What is the purpose of this research?

As you may be aware, knee pain is very common and is often associated with knee osteoarthritis. Osteoarthritis is the most common form of arthritis and is a leading cause of disability in Australia. Currently, there is no cure for osteoarthritis, therefore it is important to investigate treatments that can improve the main symptoms associated with osteoarthritis: pain, swelling, stiffness and movement difficulties. We will recruit 140 adults who have knee pain.

This study is being conducted by researchers at La Trobe University and is partly funded by the National Health and Medical Research Council (NHMRC) of Australia and Dr Peter Brukner. All assessments and consultations will be at **no cost** to you.

## 3 Who can participate?

You can participate in this study if you meet all the following:

- Between 45-85 years of age and understand written and spoken English
- Activity-related knee pain on most days of the past month
- Knee pain for at least 3 months
- No morning knee stiffness, or morning stiffness that lasts less than 30mins
- Willing to complete the assigned 12-week eating program and attend all appointments (detailed below)

You are not eligible and cannot participate in this study if you meet any of the following:

- Knee pain not primarily due to osteoarthritis (e.g., fibromyalgia, referred pain)
- Bilateral knee replacement
- Already strictly following a specific diet (e.g., low-carb, paleo, Mediterranean, Vegan)
- Received treatment from a dietitian, or knee injection, in the past 3 months
- Experienced  $\geq 5$ kg weight loss in the past 3 months or body weight  $\geq 200$ kg
- Planning to have knee surgery in the next 6 months
- Pregnant or breastfeeding
- History of psychiatric or eating disorder (excluding anxiety/depression) or bariatric surgery

## 4 What does participation in this research involve?

This study will be conducted over 6 months in total (see flowchart on next page).

### ***Pre-baseline (online/phone) appointment***

You will be asked to attend a 30-minute Zoom/telephone appointment prior to your first face-to-face appointment. At this appointment, we will discuss the consent form, outline the fasting process needed to complete your blood test and DEXA scan, and answer any questions you might have. We will also explain how to complete a 3-day food diary, which will be done using a smart phone application or paper-based food diary (personal preference).

### ***Baseline (first) appointment***

This appointment will be arranged at a convenient time for you at La Trobe University, Bundoora and will take approximately 2 hours. You will be asked to not eat/drink anything or conduct any exercise in the morning of your appointment (i.e., fasting for 12-hours) for the purpose of a blood test. At the appointment, we will assess your:

- Height, weight, waist circumference and blood pressure
- Body composition measured via a Dual-energy X-ray Absorptiometry Scan (DEXA).  
This involves laying on the scanner bed for ~7 mins. The machine uses small doses (<1% yearly dose) of radiation to assess tissue density (how much muscle and adipose tissue you have). The total effective dose of radiation has been calculated by a Medical Physicist (see risks below). Light clothing with no metal (e.g., zips, clips, underwire) should be worn (gown provided if needed). All measures will be taken by trained

researchers who hold Victorian Government radiation licenses and comply to the Code of Practice set out by the Australian Radiation Protection and Nuclear Safety Agency.

- Blood test: A trained researcher qualified to take blood will collect a small amount of blood (~25 mL, equivalent to ~4 teaspoons) from a forearm vein to assess inflammation levels.
- Questionnaires assessing your pain, activity level and quality of life and food intake
- Functional tests: i) how many times you can stand from a chair in 30 secs; and ii) how fast you can walk 40 metres.

We will provide a snack/drink as soon as you complete the DEXA and blood tests.

### **Random assignment to one of two different treatments**

At the end of the first appointment at La Trobe University, you will be randomly assigned (50:50 chance, like a coin toss) to receive a program (from qualified dietitians) to either:

- minimise processed foods that are known to promote inflammation and optimise foods shown to reduce inflammation; or
- minimise foods that are known to be high in fat content.

This means neither you nor the researchers will be able to choose which group you are assigned to. We do not know which treatment is best; to find out we need to compare the two programs. Although the two programs involve modifying some types of food that you eat, you can eat as much as you like of these foods. **You do not need to restrict the amount of food that you eat.**

Irrespective of which group you are assigned to, you will receive specific education and advice from an Accredited Practising Dietitian (APD) in a dietary consultation at the start of the study (at the end of your first appointment at La Trobe University). Your dietitian will also work with you to develop a personalised management plan to support you throughout the study. You will be asked to follow the program for 12 weeks (but you can continue for as long as you like). We will ask you to record your food intake for 3 days at up to six different times throughout the study.

### **Support phone calls**

To support you throughout the study and answer any questions you have, we will arrange up to four follow-up consultations to be conducted over the phone/online during the 12 weeks. This phone call will take approximately 15-20 minutes. At these times, we will also ask you to complete some of the same questionnaires online (via a secure link provided by e-mail).



**Figure 1. Flowchart of study assessments**

### **Follow-up appointments**

So that we can assess the results of the program you have been assigned to, we will ask you to return for face-to-face appointments at La Trobe University at **12 weeks and 6 months after your first appointment.** These follow-up appointments will be like the first appointment where



1 we will do all the same tests and questionnaires. You will need to fast (not eat/drink anything) the  
2 morning of your appointment for the blood test. You will have another dietary consultation with  
3 the study dietitian who will provide support for you to continue with the program you have been  
4 assigned. You should allow about 2 hours for these appointments. To assess longer-term results,  
5 we will ask you to complete the same online questionnaires at 1 and 2 years after your first  
6 appointment. The total time commitment for participating will be approximately 6-8 hours.  
7

8  
9 There are no additional costs associated with participating in this research project. All medical  
10 care and tests (i.e., dietitian consultations, DEXA scan, blood tests) required as part of the  
11 research project will be provided free of charge. The results of the DEXA scan and blood tests  
12 will not be used to diagnose health conditions, but only to evaluate the effects of the intervention.  
13 We will provide you with your individual results when the DEXA and blood analyses are completed  
14 at the end of the study. Your travel costs to attend the assessments will be reimbursed up to \$100.  
15

16  
17 At the end of the first 12 weeks, or after 6-12 months, we may also ask if you are willing to have  
18 a separate interview with one of the study researchers (this interview is optional and you can take  
19 part in the study without needing to complete the interview). The purpose of this interview is to  
20 seek feedback on the study treatments, satisfaction with the process received and whether there  
21 are any suggestions for improvement. The interview will take approximately 30 minutes, but you  
22 can cease the interview at any time. To ensure responses are correctly interpreted, responses to  
23 questions will be audio recorded and transcribed. Audio recording transcriptions will be completed  
24 by 'Transcription Australia' on their secure, encrypted Australian-based software. Although voice  
25 in your audio recording could lead to your identification, this file will not be used during analysis.  
26 Instead, a re-identifiable transcription, which you will have the opportunity to check for accuracy,  
27 will be used for analysis. Re-identifiable means that we will use a code number and not your name  
28 on data collected to ensure your anonymity. Following the completion of analysis of this  
29 transcription, the audio file associated with your interview will be deleted. After analysis, overall  
30 findings and conclusions from all interviews will also be sent to you, to allow an opportunity to  
31 make any further comments. We will seek around 40 participants to be interviewed. It is your  
32 decision or not whether you wish to be interviewed.  
33

## 34 35 **5 What are the alternatives to participation?**

36  
37 You do not have to take part in this research project to receive treatment for your knee. Other  
38 options are available; these include seeing a physiotherapist or dietitian (e.g., private or public  
39 health centre). The research team will discuss these options with you before you decide to take  
40 part in this project. You can also discuss the options with your doctor, dietitian or physiotherapist.  
41

## 42 43 **6 What are the possible benefits of taking part?**

44  
45 We cannot guarantee or promise that you will receive any benefits from this research. However,  
46 possible benefits may include improvement of pain, function, quality of life, physical activity, and  
47 confidence in your knee. You may gain valuable insight into how to manage your food intake and  
48 specific anti-inflammatory and low-fat foods, nutrients and eating habits. The expected benefit to  
49 society is the development of a drug-free and non-invasive treatment option to help manage pain  
50 and disability associated with osteoarthritis. This will give doctors and patients alternative ways  
51 to manage knee pain, which in turn may lead to improvements in the quality of life for patients.  
52  
53

## 54 55 **7 What are the possible risks and disadvantages of taking part?**

56  
57 With any medical treatment there are: (i) risks we know about; (ii) risks we don't know about; and  
58 (iii) risks we don't expect. We have listed the risks we know about below. You may have none,  
59 some or all the effects listed below, and they may be mild, moderate or severe. If you have any  
60 of these side effects, or are worried about them, talk with the study coordinator.



| Possible Side Effect                                                                      | How often is it likely to occur?                                                        | How severe might it be? | How long might it last?                       |
|-------------------------------------------------------------------------------------------|-----------------------------------------------------------------------------------------|-------------------------|-----------------------------------------------|
| <b>Emotional distress due to involvement in research and completion of questionnaires</b> | Rarely; although can occur when completing study questionnaires                         | Minimal                 | While completing the study questionnaires     |
| <b>Emotional distress due to diet assessment</b>                                          | Rarely; although can occur when assessing food intake prior to, or during, appointments | Minimal                 | While completing the food diary or assessment |
| <b>Discomfort due to body measurements</b>                                                | Can occur while measurements are done by your dietitian or researcher                   | Minimal<br>Mild         | During appointment only                       |
| <b>Discomfort due to blood test</b>                                                       | Rarely; while blood is being collected                                                  | Mild                    | Bruising or swelling may last 1-3 days        |
| <b>Exposure to ionising radiation</b>                                                     | 1x 7-minute scan at initial, 12-week and 6-month appointment                            | Minimal                 | Effect too small to measure                   |
| <b>Tiredness/change in bowel patterns with change in diet</b>                             | Any change in diet can make you feel tired or have different bowel patterns             | Minimal                 | 1-2 weeks                                     |
| <b>Contraction of COVID-19</b>                                                            | Can occur during the face-to-face assessments                                           | Minimal<br>Moderate     | 1-2 weeks                                     |

If you become upset or distressed because of your participation in the research, the study coordinator together with the qualified dietitian will assist you with appropriate support. We can also provide you information about services you can access to seek help for emotional distress.

#### **Risks associated with completing study questionnaires and diet assessment**

Completing questionnaires about your knee pain, function, quality of life and dietary intake may cause emotional distress. If you begin to feel upset or distressed when completing your questionnaires or dietary assessment, please let a member of the research team know. We will provide you with the appropriate support, including a document outlining services you can access to help with your emotional distress.

#### **Risks associated with blood test**

Having a blood sample taken may cause some discomfort or bruising. On very rare occasions, the blood vessel may swell, or blood may clot in the blood vessel, or the spot from which blood is taken could become inflamed. Some people may feel light-headed when having blood taken and may occasionally faint. Very rarely, there could be a minor infection or bleeding. A qualified person will take a very small amount of your blood (max 30mL each appointment (normal blood donation is 500mL)) using stringent infection control procedures. If you notice increased redness, swelling or other signs of infection in the days following your assessment, tell us immediately.

#### **Risks associated with eating low-inflammatory foods or low-fat foods**

As you adjust to the eating program you are assigned to, you may experience feelings of tiredness and/or changes in bowel habits and patterns. The researchers will assess your diet and ensure you are meeting your energy and nutrient needs throughout the study intervention. This eating program may be different than your normal diet and therefore influence your usual weekly shopping bill and expenses. As part of the consultations, you will be provided with some advice on how to follow the diet on a budget if required to ensure there is minimal financial burden.

#### **Exposure to ionising radiation**

If you choose to take part in this research, you will undergo three 7-minute DEXA scans (first, 12-week and 6-month assessments). DEXA scans are a non-invasive, fast and simple procedure. This research study involves exposure to a very small amount of radiation from a DEXA scan that you would not normally receive. As part of everyday living, everyone is exposed to naturally occurring background radiation and receives a dose of about 2 millisieverts (mSv) each year. The effective dose you will receive from all of these DEXA scans is approximately 0.03 mSv. At these

1 dose levels, no harmful effects of radiation have been demonstrated as any effect is too small to  
2 measure. The risk is believed to be minimal.  
3

4  
5 The scans we are taking are for research purposes and are not intended to be used like scans  
6 taken for a full clinical examination or to be used to help diagnose, treat or manage a particular  
7 condition. The whole-body DEXA scan may identify participants with a low bone mineral density.  
8 However, a whole body DEXA scan is not the established method for detecting low bone mineral  
9 density. Therefore, as a precaution if you are identified as having a low bone mineral density you  
10 will be encouraged to make an appointment with your General Practitioner to discuss the results.  
11

12 Have you been involved in any other research studies that involve radiation? If so, please tell us.  
13 Please keep information contained within this Patient Information Sheet about your exposure to  
14 radiation in this study, including the radiation dose, for at least 5 years. You will be required to  
15 provide this dose to researchers of any future research projects involving exposure to radiation.  
16

### 17 **Contraction of COVID-19**

18 You may be at risk of contracting COVID-19 during one of the face-to-face appointments at La  
19 Trobe University. Prior to attending La Trobe University, you will be screened for signs and  
20 symptoms of COVID-19 by a member of the research team. You will also need to be fully  
21 vaccinated (or hold a valid medical exemption) to be able to attend La Trobe University for your  
22 assessments. The research team will put in place the appropriate control measures to reduce the  
23 risk of COVID 19 transmission. The risk is believed to be minimal.  
24

## 25 **8 What if I withdraw from this research project?**

26  
27 You are under no obligation to continue with the research study. You may change your mind at  
28 any time about participating in the research. People withdraw from studies for various reasons,  
29 and you do not need to provide a reason.  
30

31  
32 You can withdraw from the study at any time by completing and signing the 'Participant  
33 Withdrawal of Consent Form'. This form is provided at the end of this document and is to be  
34 completed by you and supplied to the research team if you choose to withdraw at a later date.  
35

36  
37 If you withdraw from the study, you will be able to choose whether the study will destroy or retain  
38 the information it has collected about you. Information about you that has already been analysed  
39 (i.e., once you have been allocated to either program), may not be able to be destroyed to ensure  
40 accurate and unbiased study reporting. Personal details collected, such as your name and contact  
41 details, can be destroyed at any time upon study withdrawal.  
42

## 43 **9 What happens when the research project ends?**

44  
45 At the completion of the research project, you may continue to use the resources provided and to  
46 follow the eating program principles if you choose to. If requested, we will provide you with your  
47 individual results including your body composition (DEXA) assessment and whole study results.  
48 We, or other researchers, may also use coded information (so that you cannot be identified)  
49 collected for this research study in future related studies. If you consent (tick the box on the  
50 consent form) to be contacted for future related research, we will store your contact details (name,  
51 address, phone number, email) on the secure La Trobe University research drive, only accessible  
52 to members of the research team, and may contact you about future related research projects.  
53  
54  
55  
56  
57

## 58 **Part 2 How is the research project being conducted?**

### 59 **10 What will happen to information about me?**

1 By signing the consent form you agree to the relevant research staff collecting and using personal  
2 information about you for the research project. Any information obtained in connection with this  
3 research project that can identify you will remain confidential and securely stored. It will be  
4 disclosed only with your permission, or in compliance with the law.  
5

### 6 **Storage, retention and destruction**

7 The anonymity of your participation is assured with our procedure, in which a code number (not  
8 your name) will identify you. Data will be kept securely at La Trobe University in a locked filing  
9 cabinet and password protected research computer. Identifiable data will be stored for 15 years,  
10 then destroyed (electronic records deleted, paper-files shredded). Data will be strictly handled  
11 confidentially under guidelines set out by the National Health and Medical Research Council. The  
12 principal investigator (Dr Adam Culvenor) is responsible for maintaining this confidentiality.  
13

14  
15 In accordance with relevant Australian and/or Victorian privacy and other relevant laws, you have  
16 the right to request access to your information collected and stored by the research team. You  
17 also have the right to request that any information with which you disagree be corrected.  
18

19 The results of this project may be published and/or presented in a variety of forums and used by  
20 research students to obtain a research degree. In any publication, presentation or data files  
21 shared with other researchers, information will be provided in such a way that you cannot be  
22 identified, except with your permission.  
23

## 24 **11 Who is organising and funding the research?**

25 This research project is being conducted by Dr Adam Culvenor and a team of researchers. It has  
26 been funded by the NHMRC (GNT2008523) and Dr Peter Brukner. Dr Peter Brukner is also an  
27 investigator on the project and has written a book and developed an app that will be used as part  
28 of the study. He will not be involved in data collection, analysis or the decision to publish results.  
29 No member of the research team will receive a personal financial benefit from your involvement  
30 in this research project (other than their ordinary wages).  
31

## 32 **12 Who has reviewed the research project?**

33 All research in Australia involving humans is reviewed by an independent group of people called  
34 a Human Research Ethics Committee (HREC). The ethical aspects of this research project have  
35 been approved by the HREC of La Trobe University Human Ethics Committee.  
36

37 This project will be carried out according to the *National Statement on Ethical Conduct in Human  
38 Research (2018)*. This statement has been developed to protect the interests of people who agree  
39 to participate in human research studies.  
40

## 41 **13 Further information and who to contact**

42 For all enquiries, you can contact the Clinical Trial Manager, during business hours:  
43 Dr Adam Culvenor, Senior Research Fellow in Physiotherapy, La Trobe University  
44 Telephone: 03 9479 5116; E-mail: a.culvenor@latrobe.edu.au  
45

46 If you have any complaints about any aspect of the project, the way it is being conducted or any  
47 questions about being a research participant in general, then you may contact:  
48

49 Reviewing HREC: La Trobe University Human Research Ethics Committee  
50 Complaints Contact: Senior Human Ethics Officer, Ethics and Integrity, Research Office  
51 Telephone: 03 9479 1443 E-mail: humanethics@latrobe.edu.au  
52

53 \* Please quote the application reference number HEC22044  
54

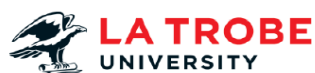

## Consent Form - *Adult providing own consent*

**Title** Optimising outcomes for people with knee pain through food: FEAST randomised controlled trial

**Short Title** The FEAST trial

**Ethics Reference Number** HEC22044

**Project Sponsor** La Trobe University

**Coordinating Principal Investigator/  
Principal Investigator** Dr Adam Culvenor (La Trobe University)  
Dr Brooke Devlin (University of Queensland)  
Prof. Peter Brukner (La Trobe University)  
Ass. Prof. Joanne Kemp (La Trobe University)

**Associate Investigator(s)** Prof. Kay Crossley (La Trobe University)  
Dr Andrea Mosler (La Trobe University)  
Dr Josh Heerey (La Trobe University)  
Ms Lynette Law (PhD student, La Trobe University)  
Ms Amanda Attanayake (SAHHSS, La Trobe University)

**Location** La Trobe University

### Consent Agreement

I have read the Participant Information Sheet and I understand the purposes, procedures and risks of the research described in the project.

I understand that data files may be shared with other researchers, and that information will be provided in such a way that I cannot be identified, except with my permission.

I have had an opportunity to ask questions and I am satisfied with the answers I have received. I freely agree to participate in this research project as described and understand that I am free to withdraw at any time during the study without affecting my future health care.

I understand that, if I decide to discontinue the study treatment, I may be asked to attend follow-up visits to allow collection of information regarding my health status. I agree that data gathered for the study may be published provided my name or other identifying information is not used.

- I wish... /  do not wish... to receive results of the study
- I consent... /  do not consent... to be contacted for future related research
- I consent... /  do not consent... to have my interview responses audio-recorded/transcribed.
- I consent... /  do not consent... to have my samples/data used in future research

I understand that I will be given a signed copy of this document to keep.

Name of Participant (please print) \_\_\_\_\_

Signature \_\_\_\_\_ Date \_\_\_\_\_

### Declaration by Researcher<sup>†</sup>

I have given a verbal explanation of the research project, its procedures and risks and I believe that the participant has understood that explanation.

Name of Researcher<sup>†</sup> (please print) \_\_\_\_\_

Signature \_\_\_\_\_ Date \_\_\_\_\_

<sup>†</sup> An appropriately qualified member of the research team must provide the explanation of, and information concerning, the research project.



STANDARD PROTOCOL ITEMS: RECOMMENDATIONS FOR INTERVENTIONAL TRIALS

SPIRIT 2013 Checklist: Recommended items to address in a clinical trial protocol and related documents\*

| Section/item                                              | Item No | Description                                                                                                                                                                                                                                                                              |                         |
|-----------------------------------------------------------|---------|------------------------------------------------------------------------------------------------------------------------------------------------------------------------------------------------------------------------------------------------------------------------------------------|-------------------------|
| <b>Administrative information</b>                         |         |                                                                                                                                                                                                                                                                                          |                         |
| Title                                                     | 1       | Descriptive title identifying the study design, population, interventions, and, if applicable, trial acronym                                                                                                                                                                             | 1                       |
| Trial registration                                        | 2a      | Trial identifier and registry name. If not yet registered, name of intended registry                                                                                                                                                                                                     | 3                       |
|                                                           | 2b      | All items from the World Health Organization Trial Registration Data Set                                                                                                                                                                                                                 | ACTRN1262200<br>0440729 |
| Protocol version                                          | 3       | Date and version identifier                                                                                                                                                                                                                                                              | NA                      |
| Funding                                                   | 4       | Sources and types of financial, material, and other support                                                                                                                                                                                                                              | 21                      |
| Roles and responsibilities                                | 5a      | Names, affiliations, and roles of protocol contributors                                                                                                                                                                                                                                  | 21                      |
|                                                           | 5b      | Name and contact information for the trial sponsor                                                                                                                                                                                                                                       | 1                       |
|                                                           | 5c      | Role of study sponsor and funders, if any, in study design; collection, management, analysis, and interpretation of data; writing of the report; and the decision to submit the report for publication, including whether they will have ultimate authority over any of these activities | 21                      |
|                                                           | 5d      | Composition, roles, and responsibilities of the coordinating centre, steering committee, endpoint adjudication committee, data management team, and other individuals or groups overseeing the trial, if applicable (see Item 21a for data monitoring committee)                         | NA                      |
| <b>Introduction</b>                                       |         |                                                                                                                                                                                                                                                                                          |                         |
| Background and rationale                                  | 6a      | Description of research question and justification for undertaking the trial, including summary of relevant studies (published and unpublished) examining benefits and harms for each intervention                                                                                       | 4                       |
|                                                           | 6b      | Explanation for choice of comparators                                                                                                                                                                                                                                                    | 4-5                     |
| Objectives                                                | 7       | Specific objectives or hypotheses                                                                                                                                                                                                                                                        | 5                       |
| Trial design                                              | 8       | Description of trial design including type of trial (eg, parallel group, crossover, factorial, single group), allocation ratio, and framework (eg, superiority, equivalence, noninferiority, exploratory)                                                                                | 5                       |
| <b>Methods: Participants, interventions, and outcomes</b> |         |                                                                                                                                                                                                                                                                                          |                         |

|                      |     |                                                                                                                                                                                                                                                                                                                                                                                |                                     |
|----------------------|-----|--------------------------------------------------------------------------------------------------------------------------------------------------------------------------------------------------------------------------------------------------------------------------------------------------------------------------------------------------------------------------------|-------------------------------------|
| Study setting        | 9   | Description of study settings (eg, community clinic, academic hospital) and list of countries where data will be collected. Reference to where list of study sites can be obtained                                                                                                                                                                                             | 5                                   |
| Eligibility criteria | 10  | Inclusion and exclusion criteria for participants. If applicable, eligibility criteria for study centres and individuals who will perform the interventions (eg, surgeons, psychotherapists)                                                                                                                                                                                   | 6-7                                 |
| Interventions        | 11a | Interventions for each group with sufficient detail to allow replication, including how and when they will be administered                                                                                                                                                                                                                                                     | 8-13, Table 2, Supplementary File 1 |
|                      | 11b | Criteria for discontinuing or modifying allocated interventions for a given trial participant (eg, drug dose change in response to harms, participant request, or improving/worsening disease)                                                                                                                                                                                 | Table 2                             |
|                      | 11c | Strategies to improve adherence to intervention protocols, and any procedures for monitoring adherence (eg, drug tablet return, laboratory tests)                                                                                                                                                                                                                              | 8-13, Table 2                       |
|                      | 11d | Relevant concomitant care and interventions that are permitted or prohibited during the trial                                                                                                                                                                                                                                                                                  | 13                                  |
| Outcomes             | 12  | Primary, secondary, and other outcomes, including the specific measurement variable (eg, systolic blood pressure), analysis metric (eg, change from baseline, final value, time to event), method of aggregation (eg, median, proportion), and time point for each outcome. Explanation of the clinical relevance of chosen efficacy and harm outcomes is strongly recommended | 13-18, Table 3                      |
| Participant timeline | 13  | Time schedule of enrolment, interventions (including any run-ins and washouts), assessments, and visits for participants. A schematic diagram is highly recommended (see Figure)                                                                                                                                                                                               | Figure 1                            |
| Sample size          | 14  | Estimated number of participants needed to achieve study objectives and how it was determined, including clinical and statistical assumptions supporting any sample size calculations                                                                                                                                                                                          | 19                                  |
| Recruitment          | 15  | Strategies for achieving adequate participant enrolment to reach target sample size                                                                                                                                                                                                                                                                                            | 7                                   |

### Methods: Assignment of interventions (for controlled trials)

#### Allocation:

|                                  |     |                                                                                                                                                                                                                                                                                                                                                          |     |
|----------------------------------|-----|----------------------------------------------------------------------------------------------------------------------------------------------------------------------------------------------------------------------------------------------------------------------------------------------------------------------------------------------------------|-----|
| Sequence generation              | 16a | Method of generating the allocation sequence (eg, computer-generated random numbers), and list of any factors for stratification. To reduce predictability of a random sequence, details of any planned restriction (eg, blocking) should be provided in a separate document that is unavailable to those who enrol participants or assign interventions | 7-8 |
| Allocation concealment mechanism | 16b | Mechanism of implementing the allocation sequence (eg, central telephone; sequentially numbered, opaque, sealed envelopes), describing any steps to conceal the sequence until interventions are assigned                                                                                                                                                | 7-8 |
| Implementation                   | 16c | Who will generate the allocation sequence, who will enrol participants, and who will assign participants to interventions                                                                                                                                                                                                                                | 7-8 |
| Blinding (masking)               | 17a | Who will be blinded after assignment to interventions (eg, trial participants, care providers, outcome assessors, data analysts), and how                                                                                                                                                                                                                | 7-8 |



1  
2  
3  
4  
5  
6  
7  
8  
9  
10  
11  
12  
13  
14  
15  
16  
17  
18  
19  
20  
21  
22  
23  
24  
25  
26  
27  
28  
29  
30  
31  
32  
33  
34  
35  
36  
37  
38  
39  
40  
41  
42  
43  
44  
45  
46  
47  
48  
49  
50  
51  
52  
53  
54  
55  
56  
57  
58  
59  
60

|  |     |                                                                                                                                                      |    |
|--|-----|------------------------------------------------------------------------------------------------------------------------------------------------------|----|
|  | 17b | If blinded, circumstances under which unblinding is permissible, and procedure for revealing a participant's allocated intervention during the trial | NA |
|--|-----|------------------------------------------------------------------------------------------------------------------------------------------------------|----|

**Methods: Data collection, management, and analysis**

|                         |     |                                                                                                                                                                                                                                                                                                                                                                                                              |    |
|-------------------------|-----|--------------------------------------------------------------------------------------------------------------------------------------------------------------------------------------------------------------------------------------------------------------------------------------------------------------------------------------------------------------------------------------------------------------|----|
| Data collection methods | 18a | Plans for assessment and collection of outcome, baseline, and other trial data, including any related processes to promote data quality (eg, duplicate measurements, training of assessors) and a description of study instruments (eg, questionnaires, laboratory tests) along with their reliability and validity, if known. Reference to where data collection forms can be found, if not in the protocol | 13 |
|-------------------------|-----|--------------------------------------------------------------------------------------------------------------------------------------------------------------------------------------------------------------------------------------------------------------------------------------------------------------------------------------------------------------------------------------------------------------|----|

|  |     |                                                                                                                                                                                           |    |
|--|-----|-------------------------------------------------------------------------------------------------------------------------------------------------------------------------------------------|----|
|  | 18b | Plans to promote participant retention and complete follow-up, including list of any outcome data to be collected for participants who discontinue or deviate from intervention protocols | 13 |
|--|-----|-------------------------------------------------------------------------------------------------------------------------------------------------------------------------------------------|----|

|                 |    |                                                                                                                                                                                                                                                                   |    |
|-----------------|----|-------------------------------------------------------------------------------------------------------------------------------------------------------------------------------------------------------------------------------------------------------------------|----|
| Data management | 19 | Plans for data entry, coding, security, and storage, including any related processes to promote data quality (eg, double data entry; range checks for data values). Reference to where details of data management procedures can be found, if not in the protocol | 18 |
|-----------------|----|-------------------------------------------------------------------------------------------------------------------------------------------------------------------------------------------------------------------------------------------------------------------|----|

|                     |     |                                                                                                                                                                          |    |
|---------------------|-----|--------------------------------------------------------------------------------------------------------------------------------------------------------------------------|----|
| Statistical methods | 20a | Statistical methods for analysing primary and secondary outcomes. Reference to where other details of the statistical analysis plan can be found, if not in the protocol | 19 |
|---------------------|-----|--------------------------------------------------------------------------------------------------------------------------------------------------------------------------|----|

|  |     |                                                                          |    |
|--|-----|--------------------------------------------------------------------------|----|
|  | 20b | Methods for any additional analyses (eg, subgroup and adjusted analyses) | 19 |
|--|-----|--------------------------------------------------------------------------|----|

|  |     |                                                                                                                                                                                 |    |
|--|-----|---------------------------------------------------------------------------------------------------------------------------------------------------------------------------------|----|
|  | 20c | Definition of analysis population relating to protocol non-adherence (eg, as randomised analysis), and any statistical methods to handle missing data (eg, multiple imputation) | 19 |
|--|-----|---------------------------------------------------------------------------------------------------------------------------------------------------------------------------------|----|

**Methods: Monitoring**

|                 |     |                                                                                                                                                                                                                                                                                                                                       |    |
|-----------------|-----|---------------------------------------------------------------------------------------------------------------------------------------------------------------------------------------------------------------------------------------------------------------------------------------------------------------------------------------|----|
| Data monitoring | 21a | Composition of data monitoring committee (DMC); summary of its role and reporting structure; statement of whether it is independent from the sponsor and competing interests; and reference to where further details about its charter can be found, if not in the protocol. Alternatively, an explanation of why a DMC is not needed | 18 |
|-----------------|-----|---------------------------------------------------------------------------------------------------------------------------------------------------------------------------------------------------------------------------------------------------------------------------------------------------------------------------------------|----|

|  |     |                                                                                                                                                                         |       |
|--|-----|-------------------------------------------------------------------------------------------------------------------------------------------------------------------------|-------|
|  | 21b | Description of any interim analyses and stopping guidelines, including who will have access to these interim results and make the final decision to terminate the trial | 19-20 |
|--|-----|-------------------------------------------------------------------------------------------------------------------------------------------------------------------------|-------|

|       |    |                                                                                                                                                                                   |    |
|-------|----|-----------------------------------------------------------------------------------------------------------------------------------------------------------------------------------|----|
| Harms | 22 | Plans for collecting, assessing, reporting, and managing solicited and spontaneously reported adverse events and other unintended effects of trial interventions or trial conduct | 16 |
|-------|----|-----------------------------------------------------------------------------------------------------------------------------------------------------------------------------------|----|

|          |    |                                                                                                                                             |    |
|----------|----|---------------------------------------------------------------------------------------------------------------------------------------------|----|
| Auditing | 23 | Frequency and procedures for auditing trial conduct, if any, and whether the process will be independent from investigators and the sponsor | NA |
|----------|----|---------------------------------------------------------------------------------------------------------------------------------------------|----|

**Ethics and dissemination**

|                          |    |                                                                                           |    |
|--------------------------|----|-------------------------------------------------------------------------------------------|----|
| Research ethics approval | 24 | Plans for seeking research ethics committee/institutional review board (REC/IRB) approval | 20 |
|--------------------------|----|-------------------------------------------------------------------------------------------|----|

|    |                               |     |                                                                                                                                                                                                                                                                                     |                      |
|----|-------------------------------|-----|-------------------------------------------------------------------------------------------------------------------------------------------------------------------------------------------------------------------------------------------------------------------------------------|----------------------|
| 1  |                               |     |                                                                                                                                                                                                                                                                                     |                      |
| 2  |                               |     |                                                                                                                                                                                                                                                                                     |                      |
| 3  |                               |     |                                                                                                                                                                                                                                                                                     |                      |
| 4  | Protocol amendments           | 25  | Plans for communicating important protocol modifications (eg, changes to eligibility criteria, outcomes, analyses) to relevant parties (eg, investigators, REC/IRBs, trial participants, trial registries, journals, regulators)                                                    | 20                   |
| 5  |                               |     |                                                                                                                                                                                                                                                                                     |                      |
| 6  |                               |     |                                                                                                                                                                                                                                                                                     |                      |
| 7  |                               |     |                                                                                                                                                                                                                                                                                     |                      |
| 8  | Consent or assent             | 26a | Who will obtain informed consent or assent from potential trial participants or authorised surrogates, and how (see Item 32)                                                                                                                                                        | 20                   |
| 9  |                               |     |                                                                                                                                                                                                                                                                                     |                      |
| 10 |                               |     |                                                                                                                                                                                                                                                                                     |                      |
| 11 |                               | 26b | Additional consent provisions for collection and use of participant data and biological specimens in ancillary studies, if applicable                                                                                                                                               | NA                   |
| 12 |                               |     |                                                                                                                                                                                                                                                                                     |                      |
| 13 |                               |     |                                                                                                                                                                                                                                                                                     |                      |
| 14 | Confidentiality               | 27  | How personal information about potential and enrolled participants will be collected, shared, and maintained in order to protect confidentiality before, during, and after the trial                                                                                                | 18                   |
| 15 |                               |     |                                                                                                                                                                                                                                                                                     |                      |
| 16 |                               |     |                                                                                                                                                                                                                                                                                     |                      |
| 17 |                               |     |                                                                                                                                                                                                                                                                                     |                      |
| 18 | Declaration of interests      | 28  | Financial and other competing interests for principal investigators for the overall trial and each study site                                                                                                                                                                       | 21                   |
| 19 |                               |     |                                                                                                                                                                                                                                                                                     |                      |
| 20 | Access to data                | 29  | Statement of who will have access to the final trial dataset, and disclosure of contractual agreements that limit such access for investigators                                                                                                                                     | Supplementary File 1 |
| 21 |                               |     |                                                                                                                                                                                                                                                                                     |                      |
| 22 |                               |     |                                                                                                                                                                                                                                                                                     |                      |
| 23 |                               |     |                                                                                                                                                                                                                                                                                     |                      |
| 24 | Ancillary and post-trial care | 30  | Provisions, if any, for ancillary and post-trial care, and for compensation to those who suffer harm from trial participation                                                                                                                                                       | NA                   |
| 25 |                               |     |                                                                                                                                                                                                                                                                                     |                      |
| 26 | Dissemination policy          | 31a | Plans for investigators and sponsor to communicate trial results to participants, healthcare professionals, the public, and other relevant groups (eg, via publication, reporting in results databases, or other data sharing arrangements), including any publication restrictions | 20                   |
| 27 |                               |     |                                                                                                                                                                                                                                                                                     |                      |
| 28 |                               | 31b | Authorship eligibility guidelines and any intended use of professional writers                                                                                                                                                                                                      | NA                   |
| 29 |                               |     |                                                                                                                                                                                                                                                                                     |                      |
| 30 |                               | 31c | Plans, if any, for granting public access to the full protocol, participant-level dataset, and statistical code                                                                                                                                                                     | NA                   |
| 31 |                               |     |                                                                                                                                                                                                                                                                                     |                      |
| 32 |                               |     |                                                                                                                                                                                                                                                                                     |                      |
| 33 |                               |     |                                                                                                                                                                                                                                                                                     |                      |
| 34 |                               |     |                                                                                                                                                                                                                                                                                     |                      |
| 35 |                               |     |                                                                                                                                                                                                                                                                                     |                      |
| 36 |                               |     |                                                                                                                                                                                                                                                                                     |                      |
| 37 |                               |     |                                                                                                                                                                                                                                                                                     |                      |
| 38 | <b>Appendices</b>             |     |                                                                                                                                                                                                                                                                                     |                      |
| 39 | Informed consent materials    | 32  | Model consent form and other related documentation given to participants and authorised surrogates                                                                                                                                                                                  | Supplementary File 1 |
| 40 |                               |     |                                                                                                                                                                                                                                                                                     |                      |
| 41 |                               |     |                                                                                                                                                                                                                                                                                     |                      |
| 42 |                               |     |                                                                                                                                                                                                                                                                                     |                      |
| 43 | Biological specimens          | 33  | Plans for collection, laboratory evaluation, and storage of biological specimens for genetic or molecular analysis in the current trial and for future use in ancillary studies, if applicable                                                                                      | Supplementary File 2 |
| 44 |                               |     |                                                                                                                                                                                                                                                                                     |                      |
| 45 |                               |     |                                                                                                                                                                                                                                                                                     |                      |

\*It is strongly recommended that this checklist be read in conjunction with the SPIRIT 2013 Explanation & Elaboration for important clarification on the items. Amendments to the protocol should be tracked and dated. The SPIRIT checklist is copyrighted by the SPIRIT Group under the Creative Commons "[Attribution-Non Commercial-No Derivs 3.0 Unported](https://creativecommons.org/licenses/by-nc-nd/3.0/)" license.
