# Supplementary material for: Effectiveness of an anti-inflammatory diet versus low-fat diet for knee osteoarthritis: the FEAST randomised controlled trial protocol
Source: PubMed Central journal article supplement — BMJ Open. 2024 Apr 2;14(4):e079374. doi: 10.1136/bmjopen-2023-079374 (PMC10989185; doi:10.1136/bmjopen-2023-079374), 2024-04-02
Supplement: bmjopen-2023-079374supp002.pdf [file bmjopen-2023-079374supp002.pdf]

# FEAST

## SAMPLE OF ANTI-INFLAMMATORY PARTICIPANT BOOKLET

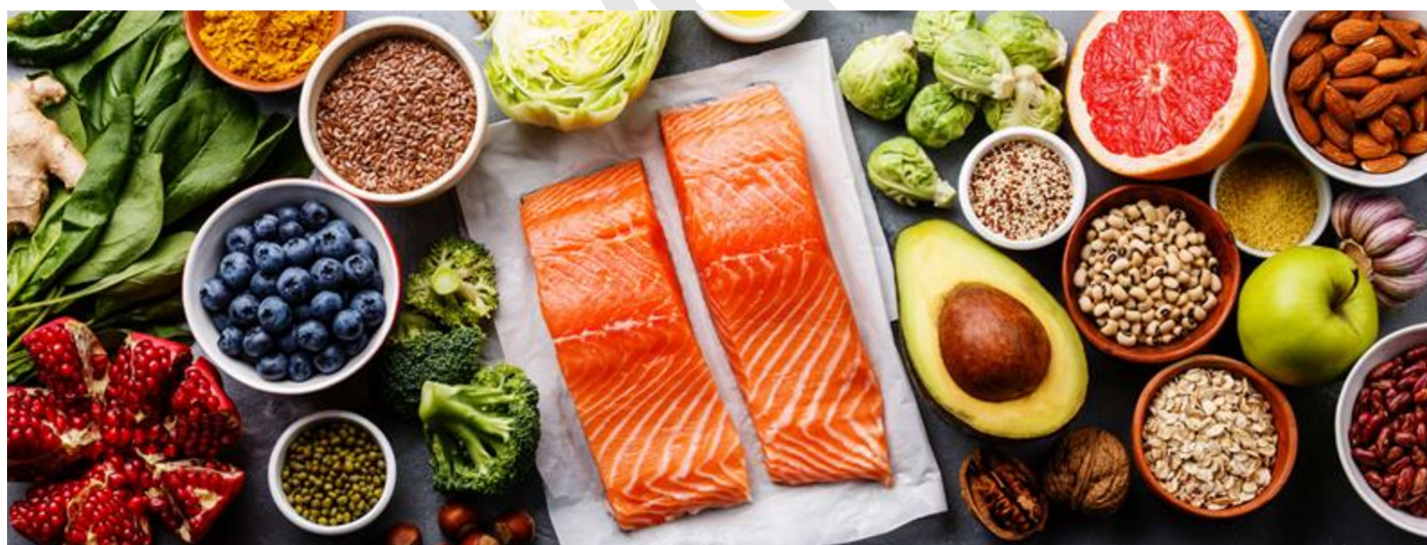

## EXAMPLE WEEKLY MEAL PLANS

Here are examples of what a week might look like. Consider these plans as a guide to give you ideas, not something written in stone! Most of the recipes below can be found on the **Defeat Diabetes** app, or by simply searching on Google online.

Lots of other anti-inflammatory/low-carbohydrate ideas online at: <https://www.eatthebutter.org/dinner-ideas/>

### Week 1

|                  | Monday                                          | Tuesday                      | Wednesday                 | Thursday                                        | Friday                                          | Saturday                                | Sunday                                     |
|------------------|-------------------------------------------------|------------------------------|---------------------------|-------------------------------------------------|-------------------------------------------------|-----------------------------------------|--------------------------------------------|
| <b>Breakfast</b> | Raspberry chia pot                              | Yoghurt with berries         | Raspberry chia pot        | Coconut crunch granola                          | Berry yoghurt smoothie                          | Scrambled eggs with spinach and avocado | Zucchini and feta fritters                 |
| <b>Snack</b>     | Apple with peanut butter                        | Hummus and veggies           | Apple with peanut butter  | Handful of almonds with piece of dark chocolate | Hummus and veggies                              | Apple with peanut butter                | Handful of walnuts                         |
| <b>Lunch</b>     | Roast vegetable salad                           | Salad with can of tuna       | Leftover prawn pad thai   | Leftover burrito bowl                           | Salad with can of tuna                          | Salmon with cauliflower rice bowl       | One pan spiced halloumi and eggplant       |
| <b>Snack</b>     | Handful of almonds with piece of dark chocolate | Almond meal blueberry muffin | Zucchini and feta fritter | Almond meal blueberry muffin                    | Handful of almonds with piece of dark chocolate | Yoghurt with berries                    | Almond meal blueberry muffin               |
| <b>Dinner</b>    | Garlic prawns with zoodles                      | Beef pad thai                | 15-minute burrito bowl    | Miso barramundi with vegetables                 | Swedish meatballs                               | Baked portobello mushrooms with feta    | Grilled lamb chops with roasted vegetables |

## Week 2

|                  | Monday                           | Tuesday                                         | Wednesday                               | Thursday                                        | Friday                                   | Saturday                                         | Sunday                               |
|------------------|----------------------------------|-------------------------------------------------|-----------------------------------------|-------------------------------------------------|------------------------------------------|--------------------------------------------------|--------------------------------------|
| <b>Breakfast</b> | Coconut crunch granola           | Berry smoothie                                  | Scrambled eggs with spinach and avocado | Berry smoothie                                  | Coconut crunch granola                   | Scrambled eggs with spinach and avocado          | Shakshuka                            |
| <b>Snack</b>     | Mini frittata                    | Pear                                            | Apple with handful of almonds           | Pear                                            | Mini frittata                            | Handful of walnuts with piece of dark chocolate  | Yoghurt with berries                 |
| <b>Lunch</b>     | Salad with sliced steak          | Easy Tuna Niçoise                               | Leftover stuffed capsicum               | Leftover burger patty with salad                | Leftover green curry with cauli rice     | Caesar salad                                     | Warm veggie salad with almonds       |
| <b>Snack</b>     | Slice of orange almond meal cake | Handful of walnuts with piece of dark chocolate | Mini frittata                           | Slice of orange almond meal cake                | Apple with handful of almonds            | Yoghurt with berries                             | Pear                                 |
| <b>Dinner</b>    | Salmon poke bowl                 | Stuffed capsicums                               | Smoky beef burger on mushroom buns      | Green vegetable and prawn curry with cauli rice | Easy mushroom, lemon, and garlic chicken | Cauliflower pizza with pesto, sausage, and herbs | Grilled steak and roasted vegetables |

## Week 3

|                  | Monday                      | Tuesday                                          | Wednesday                           | Thursday                      | Friday                                      | Saturday                             | Sunday                                     |
|------------------|-----------------------------|--------------------------------------------------|-------------------------------------|-------------------------------|---------------------------------------------|--------------------------------------|--------------------------------------------|
| <b>Breakfast</b> | Breakfast egg muffins       | Berry yoghurt smoothie                           | Breakfast egg muffins               | Chia pudding pot              | Berry yoghurt smoothie                      | Bacon and eggs with roasted tomatoes | Mexican breakfast scramble                 |
| <b>Snack</b>     | Chia pudding pot            | Beef jerky                                       | Greek yoghurt with berries          | Breakfast egg muffins         | Handful of almonds with cheese stick        | Apple with peanut butter             | Strawberry power balls                     |
| <b>Lunch</b>     | Zucchini and walnut salad   | Leftover beef burrito bowl                       | Leftover salmon patties with salad  | Greek salad                   | Leftover tagine                             | Kale, broccoli and almond salad      | Mushroom soup with crispy cheese croutons  |
| <b>Snack</b>     | Strawberry power balls      | Handful of almonds with square of dark chocolate | Strawberry power balls              | Handful of almonds with apple | Dark chocolate (avocado) mousse             | Beef jerky                           | Dark chocolate (avocado) mousse            |
| <b>Dinner</b>    | 15-minute beef burrito bowl | Salmon patties with feta sauce and beet salad    | Chicken curry with cauliflower rice | Lamb and apricot tagine       | Pan-seared barramundi with cauliflower mash | Zucchini lasagne                     | Grilled lamb chops with roasted vegetables |

## Week 4

|                  | Monday                    | Tuesday                           | Wednesday                 | Thursday                          | Friday                    | Saturday      | Sunday                |
|------------------|---------------------------|-----------------------------------|---------------------------|-----------------------------------|---------------------------|---------------|-----------------------|
| <b>Breakfast</b> | Coconut granola with milk | Blueberry almond protein smoothie | Vegetable cheese frittata | Blueberry almond protein smoothie | Coconut granola with milk | Tofu scramble | Almond flour pancakes |

---

|               |                                     |                                              |                                 |                                    |                                        |                                            |                                             |
|---------------|-------------------------------------|----------------------------------------------|---------------------------------|------------------------------------|----------------------------------------|--------------------------------------------|---------------------------------------------|
| <b>Snack</b>  | Roasted chickpeas                   | Slice of almond flour banana bread           | Greek yoghurt with berries      | Peanut butter balls                | Beef jerky                             | Roasted chickpeas                          | Handful of walnuts                          |
| <b>Lunch</b>  | Vegetable cheese frittata           | Leftover roast vegetable salad with halloumi | Leftover broccoli and leek soup | Vegetable cheese frittata          | Kale Caesar salad                      | Leftover stuffed capsicums                 | Creamy Tuscan soup                          |
| <b>Snack</b>  | Slice of almond flour banana bread  | Handful of almonds with dark chocolate       | Roasted chickpeas               | Slice of almond flour banana bread | Handful of almonds with dark chocolate | Greek yoghurt with berries                 | Peanut butter balls                         |
| <b>Dinner</b> | Roast vegetable salad with halloumi | Cheesy broccoli soup                         | Spicy tofu san choi bao         | Vegetarian stuffed zucchini boats  | Stuffed capsicums                      | Beetroot & halloumi salad with pomegranate | Spiced eggplant curry with cauliflower rice |

---
